# Supplementary material for: レム睡眠行動障害 (特集 高齢者の睡眠障害をめぐって)
Source: Royal Society of Chemistry journal article supplement (doi:10.1039/d3fd00027c), 2010-09-01
Supplement: d3fd00027c1.pdf [file d3fd00027c1.pdf]

## Supplementary information

### Ultrafast electronic, infrared, and X-ray absorption spectroscopic study of Cu(I) phosphine diimine complexes

Martin V. Appleby<sup>a</sup>, Rory A. Cowin<sup>a</sup>, Iona I. Ivalo<sup>a</sup>, Samantha L. Peralta-Arriaga<sup>a</sup>, Craig C. Robertson<sup>a</sup>, Stuart Bartlett<sup>b</sup>, Ann Fitzpatrick<sup>b</sup>, Andrew Dent<sup>b</sup>, Gabriel Karras<sup>b</sup>, Sofia Diaz-Moreno<sup>b</sup>, Dimitri Chekulaev<sup>a</sup>, Julia. A. Weinstein<sup>a</sup>

<sup>a</sup> Department of Chemistry, the University of Sheffield, Sheffield, S3 7HF, United Kingdom

<sup>b</sup> Diamond Light Source, Rutherford Appleton Laboratory, Harwell Science and Innovation Campus, Didcot, Oxfordshire, OX11 0DE, United Kingdom

#### 1. Synthesis

##### 4,4'-di(COOEt)-2,2'-biquinoline (deebq)

The ligand was synthesised following literature procedure given in brief here.<sup>1</sup> 4,4'-dicarboxylic-acid-2,2'-biquinoline (0.5 g, 1.45 mmol) was added to ethanol (23 ml) and was chilled in an ice bath to ~0 °C. Sulfuric acid (34.6 ml, 17.85 M) was added dropwise to the suspension which fully dissolved after 1 hour to give a cream-coloured solution. The solution was then refluxed for 27 h at 80 °C. Following reflux, the solution was neutralised with NaOH (133 ml, 25% w/v, 7.81 M) producing a white precipitate. The resulting precipitate was filtered to yield a white powder (349.6 mg, 64% yield).

4,4'-di(COOEt) 2,2'-biquinoline: <sup>1</sup>H NMR (400 MHz, CDCl<sub>3</sub>): 9.33 (2H, s), 8.82 (2H, d, J = 8.4 Hz), 8.36 (2H, d, J = 8.4 Hz), 7.90-7.80 (2H, m), 7.73 (2H, m, J = 8.3, 6.9, 1.2 Hz), 4.63 (4H, q, J = 7.1 Hz), 1.58 (6H, t, J = 8.0 Hz). m/z (ES+) 401.2 (100%, M+)

##### [Cu(deebq)<sub>2</sub>](BF<sub>4</sub>) (D1)

deebq (107 mg, 0.42 mmol) and [Cu(CH<sub>3</sub>CN)<sub>4</sub>](BF<sub>4</sub>) (52 mg, 0.16 mmol) were dissolved in dry DCM (10 mL) under N<sub>2</sub>. The solution was then stirred for 1 h. The solvent was reduced to minimal volume (~2 mL) by rotary evaporation. A dark blue precipitate crashed out of solution upon addition of diethyl ether. The product was dried in a vacuum desiccator, yielding a dark-blue powder (122 mg, 93%).

[Cu(deebq)<sub>2</sub>](BF<sub>4</sub>): <sup>1</sup>H NMR (400 MHz, CDCl<sub>3</sub>) δ (ppm): 9.38 (4H, s), 8.86 (4H, d, J=8.0 Hz), 7.73 (4H, d, J=8.5 Hz), 7.68 (4H, t, J=7.5 Hz), 7.45 (4H, t, J=7.5 Hz), 4.76 (8H, q, J=7.4 Hz), 1.58 (12H, t, J=7.1 Hz). m/z (ES+) 863.4 (100%, M<sup>+</sup>)

##### [Cu(xantphos)(deebq)]BF<sub>4</sub> (D2)

Complexes D2 and D3 were synthesised following an adapted literature procedure.<sup>2</sup> xantphos (166 mg, 0.29 mmol) and [Cu(CH<sub>3</sub>CN)<sub>4</sub>](BF<sub>4</sub>) (100 mg, 0.33 mmol) were dissolved in dry DCM (10 mL). The solution was then stirred for 1 h. While the solution was stirred, deebq (108 mg, 0.42 mmol) dissolved in DCM (5mL) was added. The solution was stirred for a further hour. The solvent was reduced to minimal volume (~2 mL) by rotary evaporation. A dark orange precipitate crashed out of solution upon addition of diethyl ether. The product was dried in a vacuum desiccator to yield a dark-orange powder. (244 mg, 76%).

[Cu(xantphos)(deebq)]BF<sub>4</sub>: <sup>1</sup>H NMR (400 MHz, CDCl<sub>3</sub>) δ 8.92 (2H, s, dcbq), 8.76 (2H, d, J=7.8 Hz, dcbq), 7.98 (2H, d, J=8.2 Hz, dcbq), 7.78 (2H, d, J=8.2 Hz), 7.64 (2H, t, J=7.8 Hz), 7.35-7.29 (4H, m), 7.26-7.02 (10H, m, xantphos), 6.94-6.89 (2H, m), 4.71 (4H, q, J=7.1 Hz, dcbq), 1.94 (6H, s, xantphos), 1.55 (6H, t, J = 7.1 Hz, dcbq). m/z (ES+) 1041.3 (100%, M<sup>+</sup>)

### [Cu(DPEphos)(deebq)]BF<sub>4</sub> (D3)

DPEphos (150 mg, 0.28 mmol) and [Cu(CH<sub>3</sub>CN)<sub>4</sub>](BF<sub>4</sub>) (100 mg, 0.33 mmol) were dissolved in dry DCM (10 mL). The solution was then stirred for 1 h. While the solution was stirred, dcbq (106 mg, 0.41 mmol) dissolved in DCM (5 mL) was added. The solution was stirred for a further hour. The solvent was reduced to minimal volume (~2 mL) by rotary evaporation. A dark orange precipitate crashed out of solution upon addition of diethyl ether. The product was dried in a vacuum desiccator, yielding a dark-orange powder (141 mg, 46%).

[Cu(DPEphos)(deebq)]BF<sub>4</sub>: <sup>1</sup>H NMR (400 MHz, CDCl<sub>3</sub>) δ 8.79 (2H, d, J=8.2 Hz, DPEphos), 8.71 (2H, s, dcbq), 8.44 (2H, d, J= 8.2 Hz, dcbq), 7.69-7.63 (2H, m, dcbq), 7.50-7.40 (2H, m), 7.25-7.12 (10H, m), 6.92 (8H, dd, J=29.1, 21.8 Hz, DPEphos), 6.71 (8H, dd, J=29.1, 21.8 Hz, DPEphos), 4.70 (4H, q, J= 7.1 Hz, dcbq), 1.53 (6H, t, J=8.0 Hz, dcbq). m/z (ES+) 1001.3 (100%, M<sup>+</sup>)

## 2. Steady-state electronic spectroscopy

Table S1. Absorption band maxima ( $\lambda_{\text{max}}$ /nm) for **D1-D3** in different solvents

| Solvent    | Dielectric constant <sup>a</sup> | Dipole moment <sup>a</sup> | Viscosity 10 <sup>-3</sup> Pa s <sup>a</sup> | D1  | D2  | D3  |
|------------|----------------------------------|----------------------------|----------------------------------------------|-----|-----|-----|
| Hexane     | 1.9                              | 0.1                        | 0.29                                         | 581 | -   | -   |
| Chloroform | 4.8                              | 1.0                        | 0.54                                         | 581 | 496 | 496 |
| DCM        | 8.9                              | 1.6                        | 0.42                                         | 579 | 499 | 496 |
| Acetone    | 21                               | 2.85                       | 0.30                                         | 577 | 489 | 483 |
| Ethanol    | 24                               | 1.7                        | 1.08                                         | 581 | 490 | 496 |

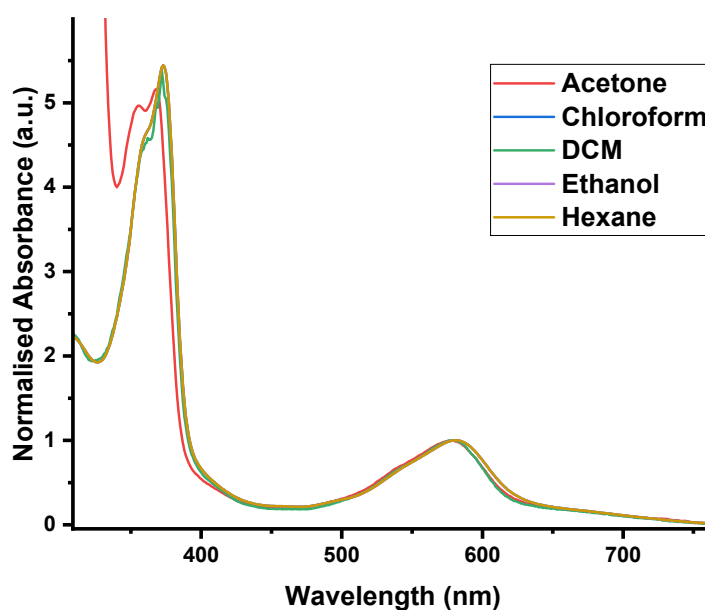

Figure S1. Normalised UV-vis absorption of [Cu(deebq)<sub>2</sub>]BF<sub>4</sub> (**D1**) in acetone (red), chloroform (blue), DCM (green), ethanol (purple) and Hexane (yellow). The spectra are normalised to the absorption maximum of the MLCT band.

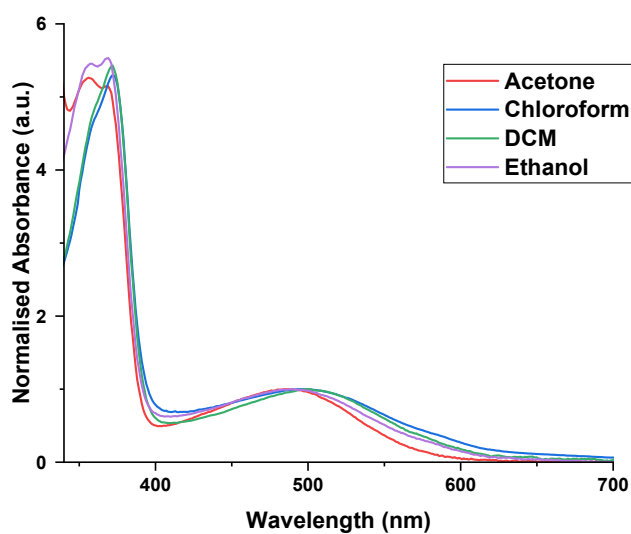

Figure S2. Normalised UV-vis absorption of  $[\text{Cu}(\text{xantphos})(\text{deebq})]\text{BF}_4$  (**D2**) in acetone (red), chloroform (blue), DCM (green) and ethanol (purple). The spectra are normalised to the absorption maximum of the MLCT band. The second absorption band at  $\sim 575$  nm is tentatively assigned to formation of **D1** via ligand scrambling.

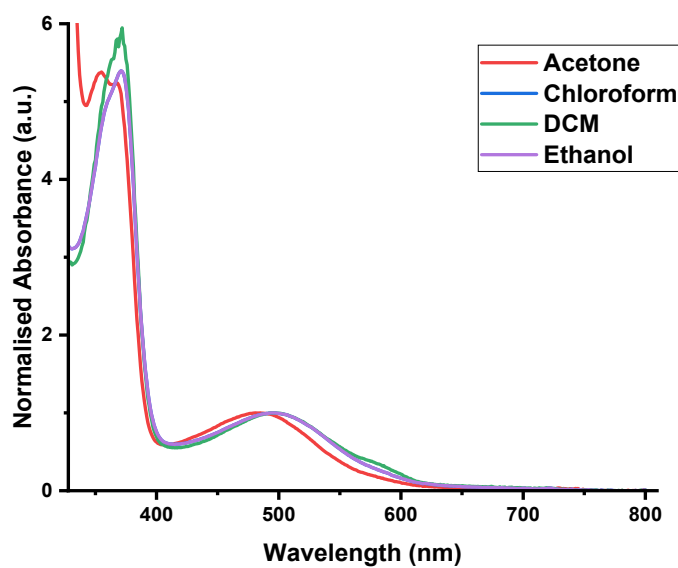

Figure S3. Normalised UV-vis absorption of  $[\text{Cu}(\text{DPEphos})(\text{deebq})]\text{BF}_4$  (**D3**) in acetone (red), chloroform (blue), DCM (green) and ethanol (purple). The spectra are normalised to the absorption maximum of the MLCT band. The second absorption band at  $\sim 575$  nm is tentatively assigned to formation of **D1** via ligand scrambling.

### 3. Transient absorption spectroscopy

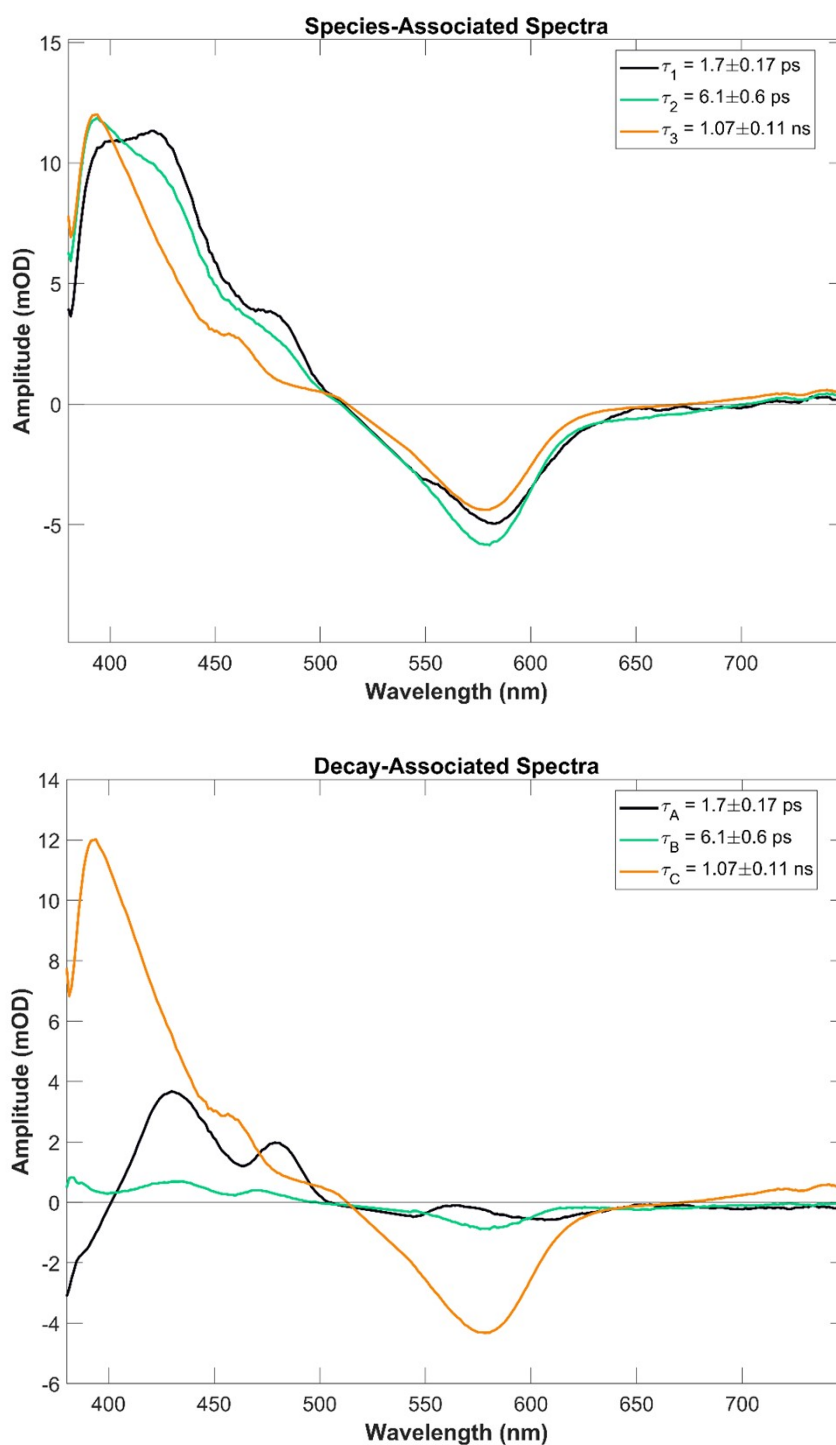

Figure S4. Top: Species-Associated Spectra (SAS) and, Bottom: Decay-Associated Spectra (DAS) for the fs-transient absorption spectra of  $[\text{Cu}(\text{deebq})_2]\text{BF}_4$  (**D1**) in DCM, after photoexcitation from 525 nm ( $\text{OD}@525\text{nm}=0.2$ , 2 mW), collected with the pump set to magic angle ( $54.7^\circ$ ) with respect to the probe. The time delay between the pump and probe for each spectrum is shown in the legend. The spectra have been cropped between 510 and 540 nm to remove pump scatter.

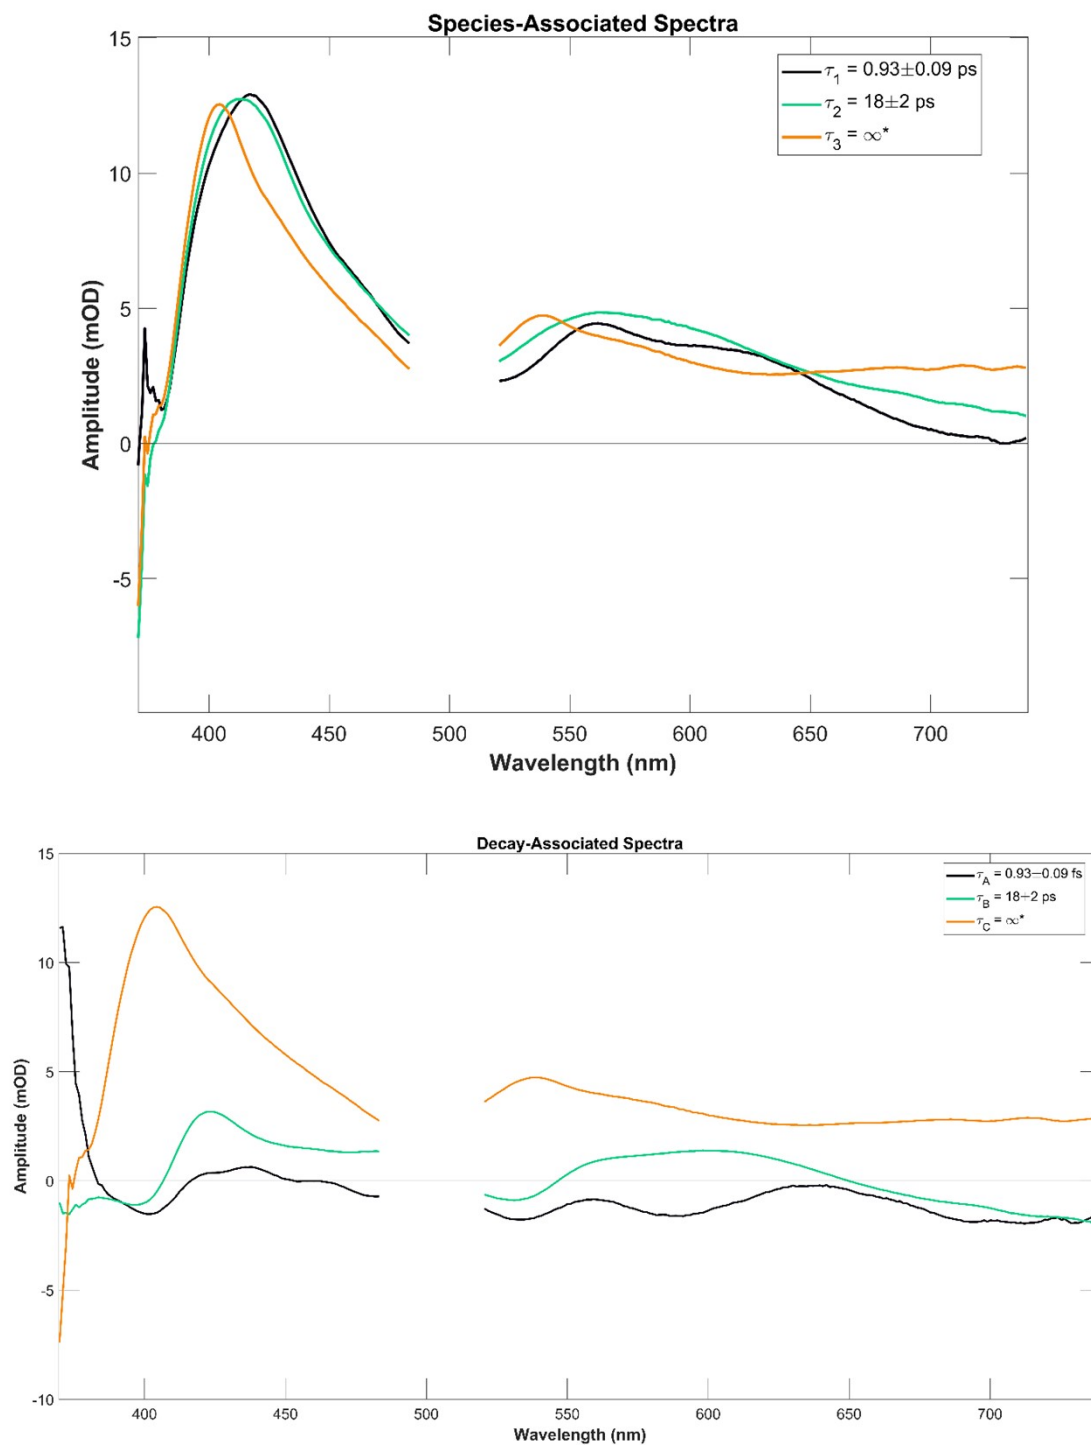

Figure S5. Top: Species-Associated Spectra (SAS) and, Bottom: Decay-Associated Spectra (DAS) for the fs-transient absorption spectra of [Cu(xant)(deebq)]BF<sub>4</sub> (**D2**) in DCM, after photoexcitation from 500 nm (OD@500nm=0.38, 2 mW), collected with the pump set to magic angle (54.7 °) with respect to the probe. The time delay between the pump and probe for each spectrum is shown in the legend. The spectra have been cropped between 510 and 540 nm to remove pump scatter.

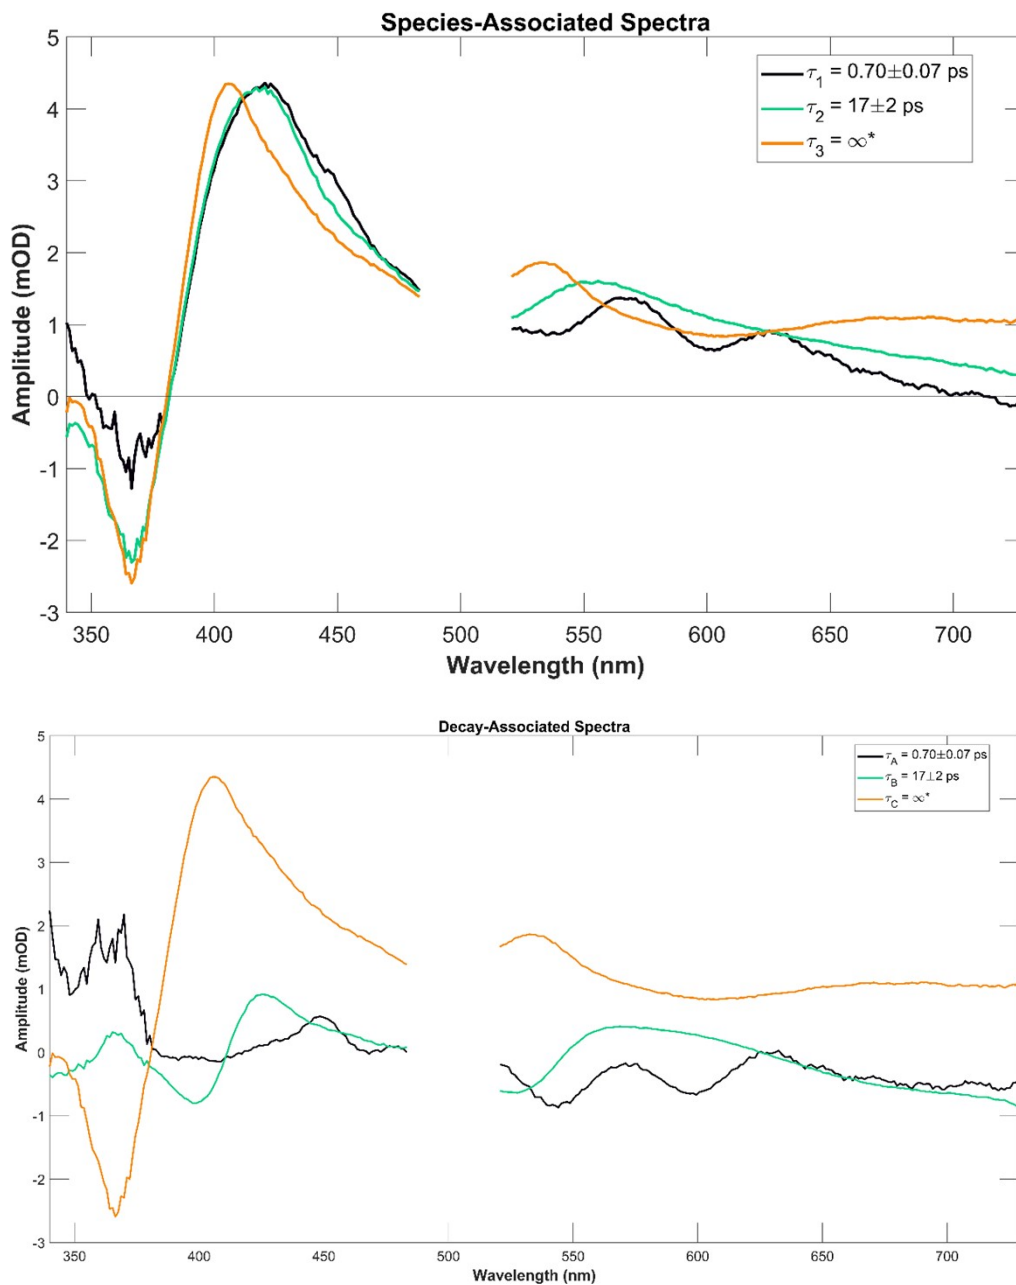

Figure S6. Top: Species-Associated Spectra (SAS) and, Bottom: Decay-Associated Spectra (DAS) for the fs-transient absorption spectra of [Cu(DPEphos)(deebq)]BF<sub>4</sub> (**D3**) in DCM, after photoexcitation from 500 nm (OD@500nm=0.2, 2 mW), collected with the pump set to magic angle (54.7 °) with respect to the probe. The time delay between the pump and probe for each spectrum is shown in the legend. The spectra have been cropped between 510 and 540 nm to remove pump scatt

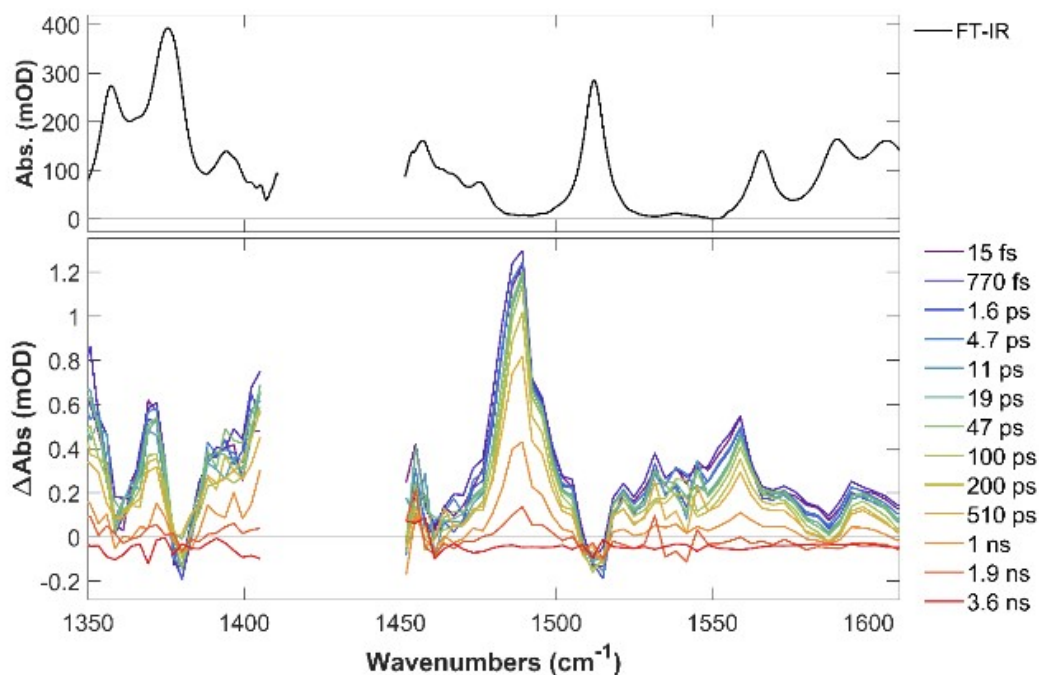

Figure S7. TRIR spectra of  $[\text{Cu}(\text{deebq})_2]\text{BF}_4$  (**D1**) from  $1350\text{-}1625\text{ cm}^{-1}$  in DCM following excitation at  $525\text{ nm}$  ( $2\text{ mW}$ ,  $\text{OD}@525\text{nm} = 0.6$ ), collected with the pump set to magic angle ( $54.7^\circ$ ) with respect to the probe. The time delay between the pump and probe for each spectrum is shown in the legend.

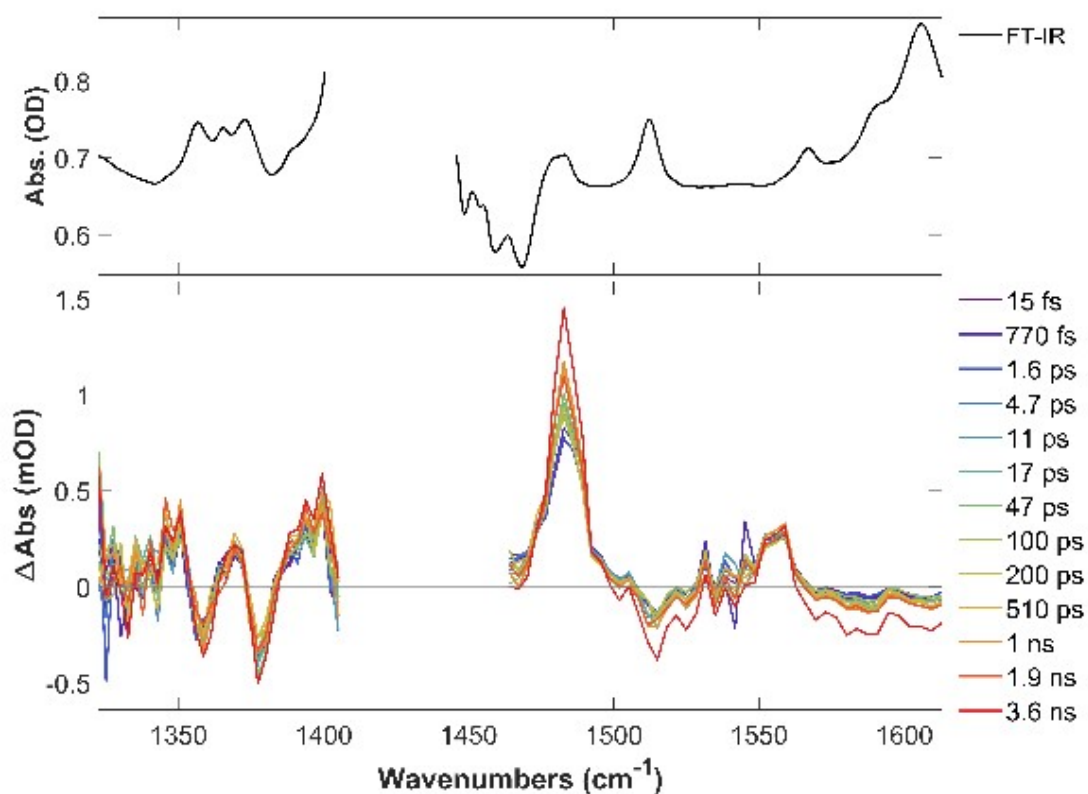

Figure S8. TRIR spectra of  $[\text{Cu}(\text{xant})(\text{deebq})]\text{BF}_4$  (**D2**) from  $1300\text{-}1650\text{ cm}^{-1}$ . TRIR spectra were recorded in DCM following excitation at  $500\text{ nm}$  ( $2\text{ mW}$ ,  $\text{OD}@500\text{nm} = 0.6$ ), collected with the pump set to magic angle ( $54.7^\circ$ ) with respect to the probe. The time delay between the pump and probe for each spectrum is shown in the legend.

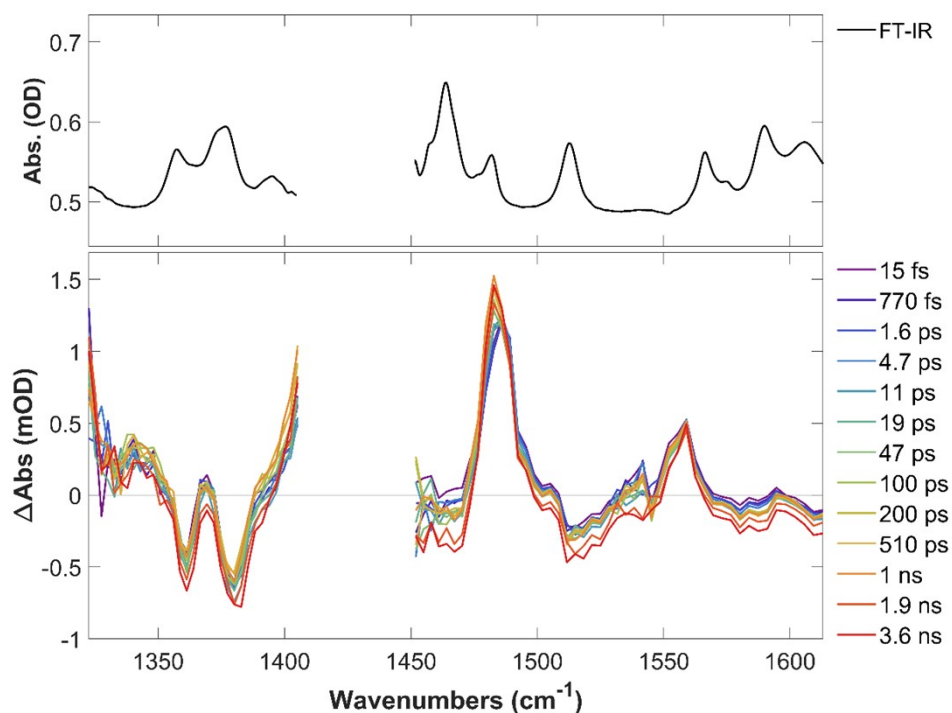

Figure S9. TRIR spectra of [Cu(DPEphos)(deebq)]BF<sub>4</sub> (D3) from 1340-1620 cm<sup>-1</sup>. TRIR spectra were recorded in DCM following excitation at 530 nm (2 mW, OD@530nm = 0.65), collected with the pump set to magic angle (54.7 °) with respect to the probe. The time delay between the pump and probe for each spectrum is shown in the legend.

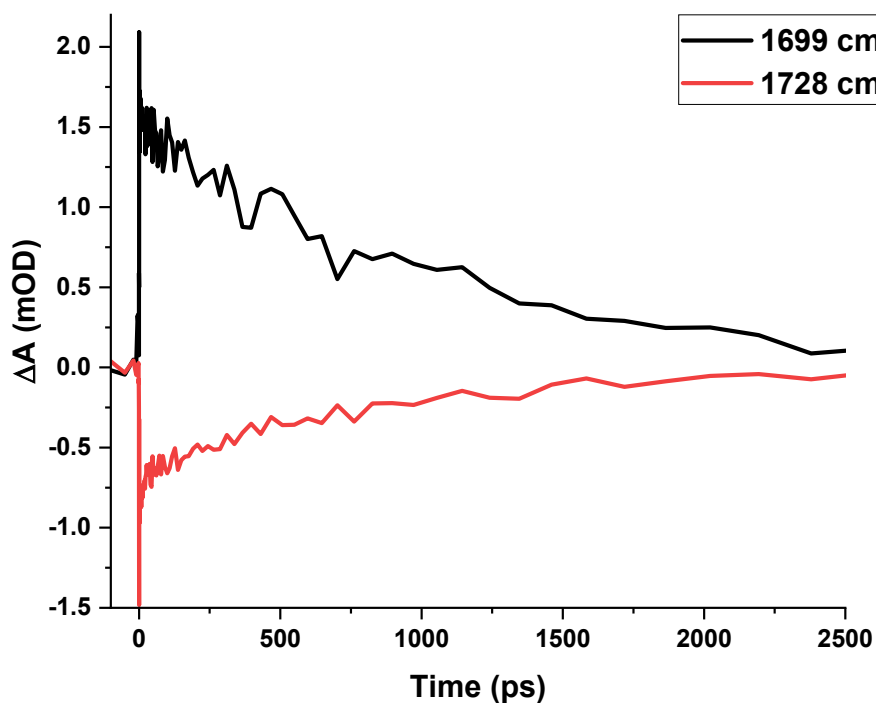

Figure S10. TRIR kinetics of [Cu(deebq)<sub>2</sub>]BF<sub>4</sub> (D1) in DCM following excitation at 525 nm (2 mW, OD@525nm = 0.6), collected with the pump set to magic angle (54.7 °) with respect to the probe.



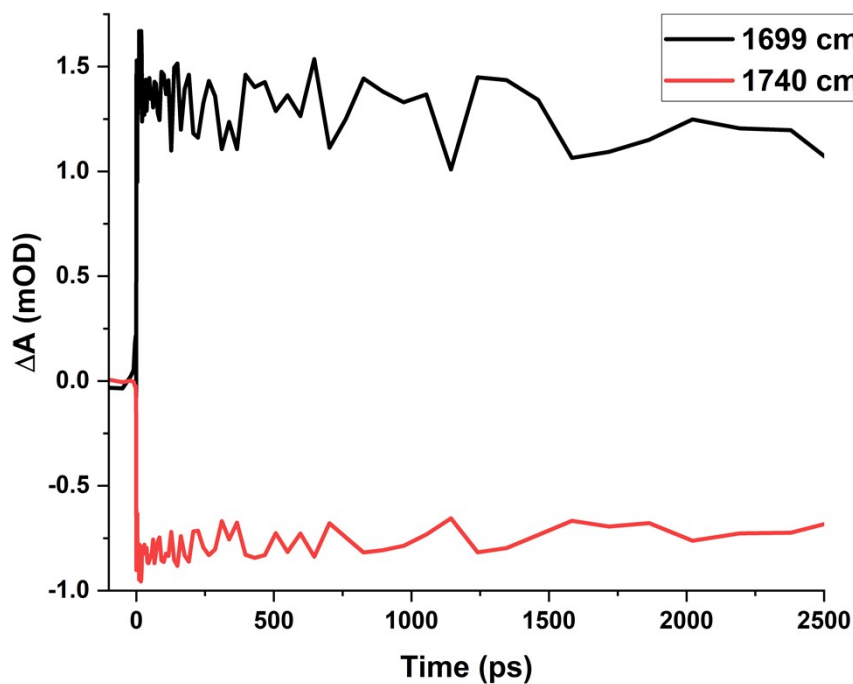

Figure S11. TRIR kinetics of [Cu(xant)(deebq)]BF<sub>4</sub> (D2). TRIR spectra were recorded in DCM following excitation at 500 nm (2 mW, OD@500nm = 0.6), collected with the pump set to magic angle (54.7 °) with respect to the probe.

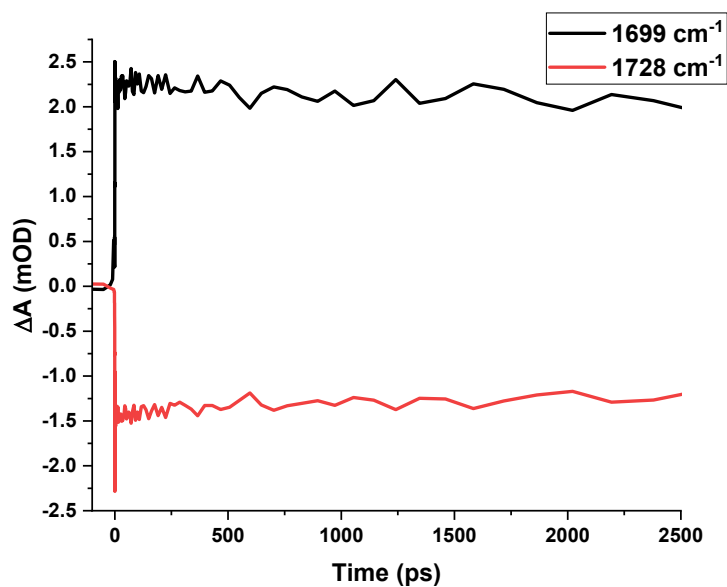

Figure S12. TRIR spectra of [Cu(DPEphos)(deebq)]BF<sub>4</sub> (D3) from 1340-1620 cm<sup>-1</sup>. TRIR spectra were recorded in DCM following excitation at 530 nm (2 mW, OD@530nm = 0.65), collected with the pump set to magic angle (54.7 °) with respect to the probe. The time delay between the pump and probe for each spectrum is shown in the legend.

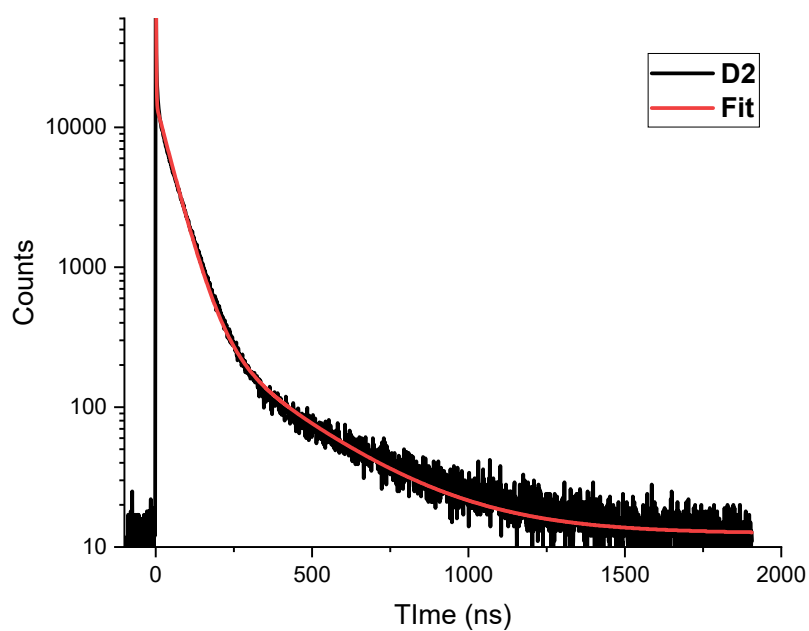

Figure S13. TCSPC data for emission decay of D2 in aerated DCM (405 nm excitation), collected with 50-nm band-pass filter.

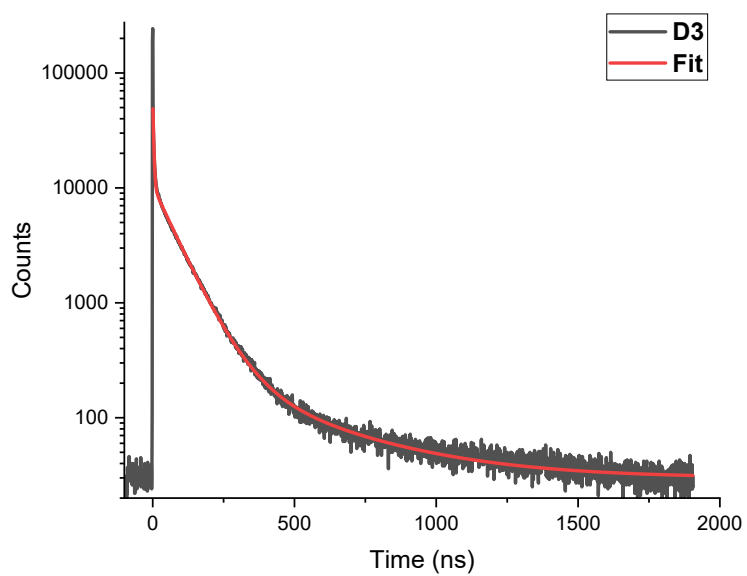

Figure S14. TCSPC for emission decay of D3 in aerated DCM (405 nm excitation), collected with 50-nm band-pass filter.

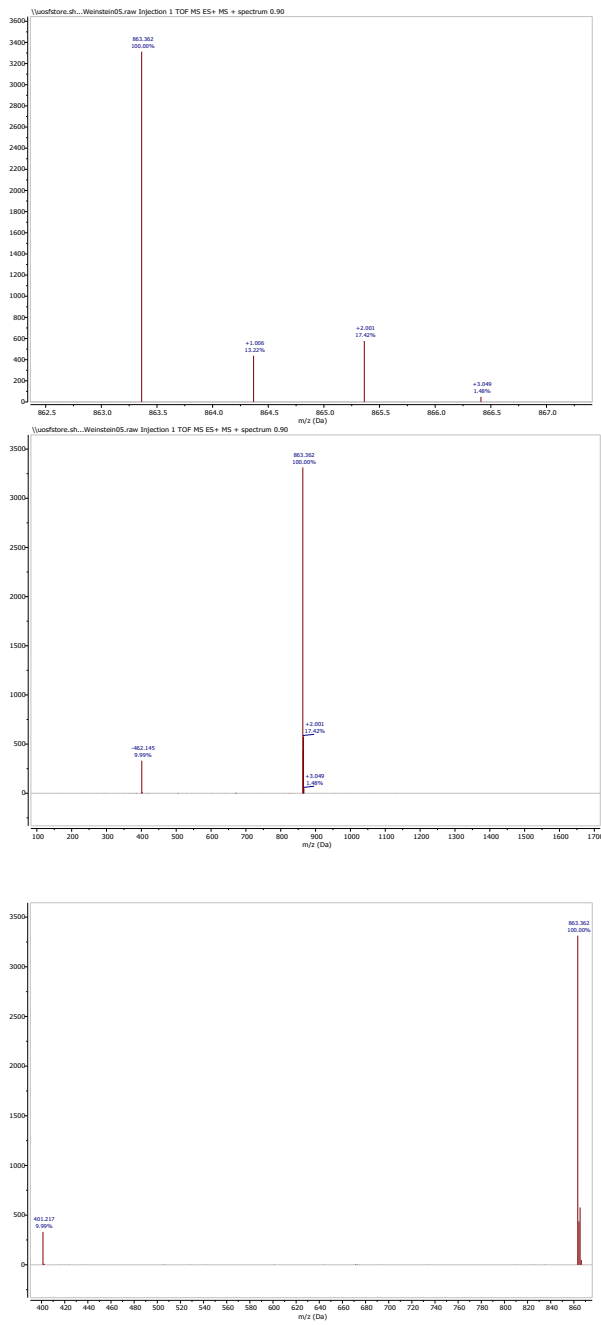

Figure S15. ES+ Mass Spectra of **D1** (note that only one species with Cu is present)

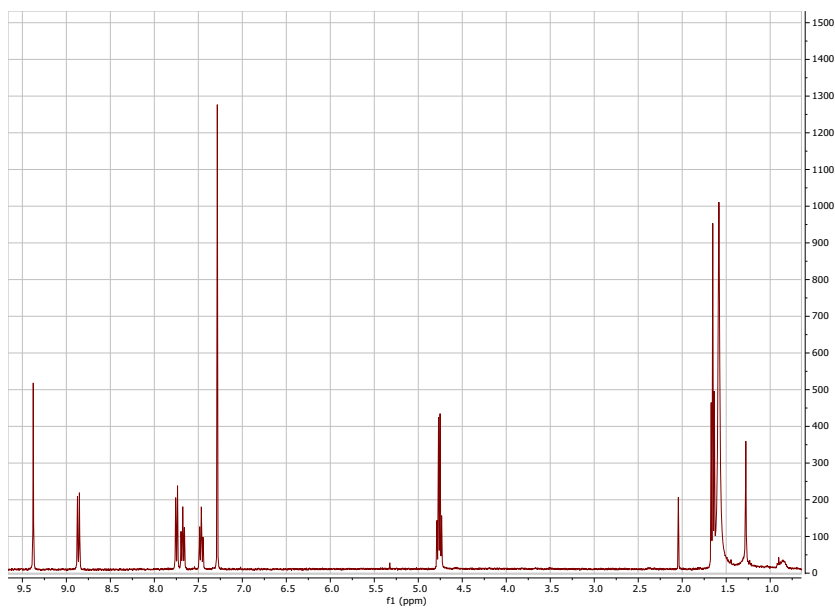

Figure S16:  $^1\text{H}$  NMR of complex **D1** in  $\text{CDCl}_3$ .  $^1\text{H}$  NMR (400 MHz,  $\text{CDCl}_3$ )  $\delta$  (ppm): 9.38 (4H, s), 8.86 (4H, d,  $J=8.0$  Hz), 7.73 (4H, d,  $J=8.5$  Hz), 7.68 (4H, t,  $J=7.5$  Hz), 7.45 (4H, t,  $J=7.5$  Hz), 4.76 (8H, q,  $J=7.4$  Hz), 1.58 (12H, t,  $J=7.1$  Hz).

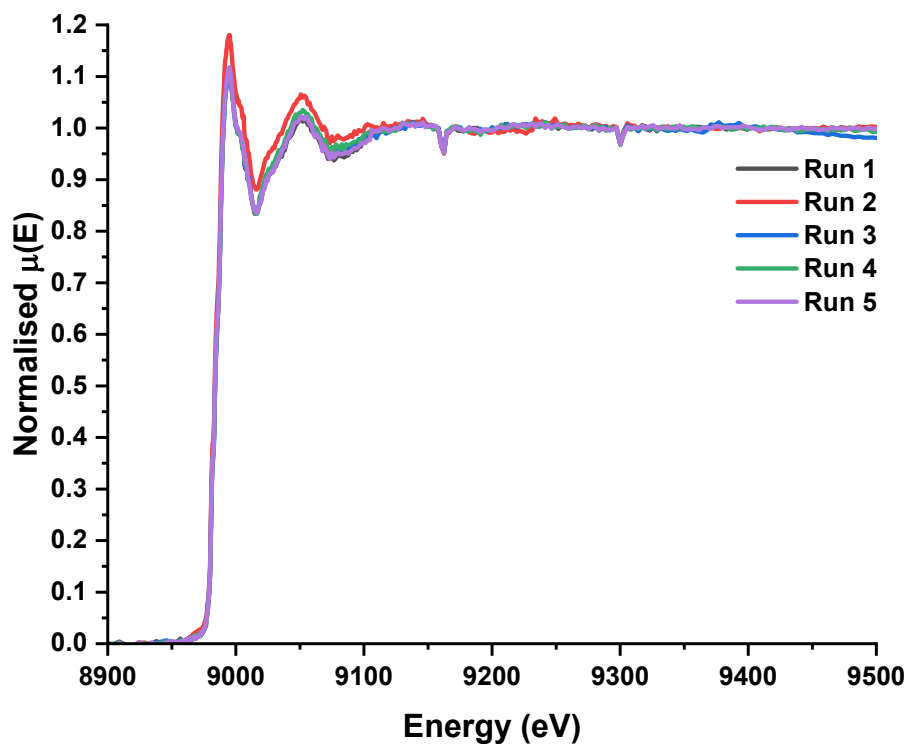

Figure S17. Sequential runs of EXAFS recorded for **D1** plotted as normalised  $m(E)$  against energy, eV, showing no major changes to the spectra following repeated X-ray exposure. Run 2 (red spectrum) is slightly higher in intensity – note that the data are not normalised for the X-ray flux.

#### 4. Crystallography data for complex **D1**

**Table S2 Crystal data and structure refinement for D1.**

|                                             |                                                                                 |
|---------------------------------------------|---------------------------------------------------------------------------------|
| Identification code                         | <b>D1</b>                                                                       |
| Empirical formula                           | C <sub>48</sub> H <sub>40</sub> BCuF <sub>4</sub> N <sub>4</sub> O <sub>8</sub> |
| Formula weight                              | 951.19                                                                          |
| Temperature/K                               | 100.00                                                                          |
| Crystal system                              | triclinic                                                                       |
| Space group                                 | P-1                                                                             |
| a/Å                                         | 11.7561(8)                                                                      |
| b/Å                                         | 13.8748(10)                                                                     |
| c/Å                                         | 14.2785(10)                                                                     |
| α/°                                         | 88.744(3)                                                                       |
| β/°                                         | 75.329(4)                                                                       |
| γ/°                                         | 66.116(3)                                                                       |
| Volume/Å <sup>3</sup>                       | 2051.6(3)                                                                       |
| Z                                           | 2                                                                               |
| ρ <sub>calc</sub> /cm <sup>3</sup>          | 1.540                                                                           |
| μ/mm <sup>-1</sup>                          | 1.459                                                                           |
| F(000)                                      | 980.0                                                                           |
| Crystal size/mm <sup>3</sup>                | 0.25 × 0.084 × 0.068                                                            |
| Radiation                                   | CuKα (λ = 1.54178)                                                              |
| 2θ range for data collection/°              | 6.426 to 133.914                                                                |
| Index ranges                                | -13 ≤ h ≤ 14, -16 ≤ k ≤ 16, -16 ≤ l ≤ 17                                        |
| Reflections collected                       | 26569                                                                           |
| Independent reflections                     | 7071 [R <sub>int</sub> = 0.0790, R <sub>sigma</sub> = 0.0586]                   |
| Data/restraints/parameters                  | 7071/0/599                                                                      |
| Goodness-of-fit on F <sup>2</sup>           | 1.066                                                                           |
| Final R indexes [I ≥ 2σ (I)]                | R <sub>1</sub> = 0.0902, wR <sub>2</sub> = 0.2439                               |
| Final R indexes [all data]                  | R <sub>1</sub> = 0.1225, wR <sub>2</sub> = 0.2747                               |
| Largest diff. peak/hole / e Å <sup>-3</sup> | 1.53/-0.49                                                                      |

**Table S3 Fractional Atomic Coordinates (×10<sup>4</sup>) and Equivalent Isotropic Displacement Parameters (Å<sup>2</sup>×10<sup>3</sup>) for D1. U<sub>eq</sub> is defined as 1/3 of the trace of the orthogonalised U<sub>ij</sub> tensor.**

| Atom | x          | y          | z          | U(eq)    |
|------|------------|------------|------------|----------|
| Cu1  | 6981.9 (8) | 6279.3 (6) | 3060.5 (6) | 45.5 (3) |
| F1   | 9434 (3)   | 1724 (3)   | 4201 (2)   | 56.1 (8) |
| F2   | 10321 (3)  | 1018 (3)   | 2621 (3)   | 60.5 (9) |
| F3   | 8194 (3)   | 1447 (3)   | 3333 (3)   | 54.7 (8) |
| F4   | 8914 (4)   | 2743 (3)   | 2970 (3)   | 59.2 (9) |

**Table S3 Fractional Atomic Coordinates ( $\times 10^4$ ) and Equivalent Isotropic Displacement Parameters ( $\text{\AA}^2 \times 10^3$ ) for D1.  $U_{\text{eq}}$  is defined as 1/3 of the trace of the orthogonalised  $U_{\text{IJ}}$  tensor.**

| Atom | <i>x</i>  | <i>y</i>  | <i>z</i> | $U(\text{eq})$ |
|------|-----------|-----------|----------|----------------|
| O1   | 5204 (5)  | 2106 (3)  | 2545 (3) | 57.5 (11)      |
| O2   | 5116 (4)  | 2184 (3)  | 4135 (3) | 50.1 (9)       |
| O3   | 9069 (5)  | 3821 (4)  | 7113 (3) | 57.5 (11)      |
| O4   | 8210 (4)  | 2858 (3)  | 6542 (3) | 53.2 (10)      |
| O5   | 3707 (4)  | 11222 (3) | 1352 (3) | 59.8 (11)      |
| O6   | 5809 (4)  | 10713 (3) | 646 (3)  | 50.7 (9)       |
| O7   | 12577 (4) | 6129 (4)  | -469 (3) | 65.2 (12)      |
| O8   | 11048 (4) | 7770 (3)  | -363 (3) | 51.9 (10)      |
| N1   | 6127 (4)  | 5265 (4)  | 3146 (3) | 43.5 (10)      |
| N2   | 7353 (5)  | 5637 (3)  | 4289 (3) | 43.8 (10)      |
| N3   | 6190 (5)  | 7789 (4)  | 2740 (3) | 45.2 (10)      |
| N4   | 8461 (5)  | 6232 (4)  | 1920 (3) | 44.4 (10)      |
| C1   | 5449 (5)  | 5140 (4)  | 2534 (4) | 43.0 (12)      |
| C2   | 5123 (6)  | 5909 (4)  | 1853 (4) | 47.1 (13)      |
| C3   | 4453 (6)  | 5821 (5)  | 1240 (4) | 50.2 (13)      |
| C4   | 4023 (6)  | 5005 (5)  | 1288 (4) | 52.5 (14)      |
| C5   | 4326 (6)  | 4253 (5)  | 1929 (4) | 49.1 (13)      |
| C6   | 5057 (5)  | 4292 (4)  | 2564 (4) | 45.5 (12)      |
| C7   | 5423 (5)  | 3550 (4)  | 3258 (4) | 44.1 (12)      |
| C8   | 6035 (5)  | 3723 (4)  | 3892 (4) | 44.8 (12)      |
| C9   | 6392 (5)  | 4584 (4)  | 3808 (4) | 40.9 (11)      |
| C10  | 7088 (5)  | 4795 (4)  | 4467 (4) | 42.9 (12)      |
| C11  | 7450 (5)  | 4159 (4)  | 5207 (4) | 44.0 (12)      |
| C12  | 8045 (5)  | 4430 (4)  | 5815 (4) | 44.4 (12)      |
| C13  | 8260 (6)  | 5367 (4)  | 5686 (4) | 44.9 (12)      |
| C14  | 8782 (6)  | 5777 (5)  | 6295 (4) | 50.0 (13)      |
| C15  | 8980 (6)  | 6675 (5)  | 6096 (4) | 50.8 (13)      |
| C16  | 8685 (6)  | 7212 (5)  | 5281 (4) | 49.3 (13)      |
| C17  | 8154 (6)  | 6861 (4)  | 4697 (4) | 45.8 (12)      |
| C18  | 7915 (5)  | 5947 (4)  | 4884 (4) | 44.5 (12)      |
| C19  | 5223 (6)  | 2554 (5)  | 3256 (4) | 48.7 (13)      |
| C20  | 5037 (6)  | 1162 (5)  | 4181 (4) | 52.5 (14)      |
| C21  | 6329 (6)  | 270 (5)   | 3804 (5) | 54.2 (14)      |
| C22  | 8500 (6)  | 3686 (5)  | 6573 (4) | 47.7 (13)      |
| C23  | 8693 (6)  | 2052 (5)  | 7188 (4) | 54.1 (14)      |
| C24  | 10081 (7) | 1336 (5)  | 6777 (5) | 67.6 (18)      |
| C25  | 4932 (6)  | 8486 (4)  | 3060 (4) | 45.4 (12)      |
| C26  | 4141 (6)  | 8207 (4)  | 3830 (4) | 44.8 (12)      |
| C27  | 2860 (6)  | 8863 (5)  | 4202 (4) | 50.0 (13)      |
| C28  | 2332 (6)  | 9839 (5)  | 3806 (4) | 48.1 (13)      |
| C29  | 3083 (6)  | 10143 (5) | 3056 (4) | 48.1 (13)      |

**Table S3 Fractional Atomic Coordinates ( $\times 10^4$ ) and Equivalent Isotropic Displacement Parameters ( $\text{\AA}^2 \times 10^3$ ) for D1.  $U_{\text{eq}}$  is defined as 1/3 of the trace of the orthogonalised  $U_{\text{IJ}}$  tensor.**

| Atom | $x$       | $y$       | $z$       | $U(\text{eq})$ |
|------|-----------|-----------|-----------|----------------|
| C30  | 4394 (6)  | 9481 (4)  | 2653 (4)  | 44.3 (12)      |
| C31  | 5271 (6)  | 9693 (5)  | 1859 (4)  | 49.4 (13)      |
| C32  | 6523 (6)  | 8988 (5)  | 1561 (4)  | 46.0 (12)      |
| C33  | 6964 (6)  | 8032 (4)  | 2003 (4)  | 43.9 (12)      |
| C34  | 8288 (6)  | 7193 (4)  | 1633 (4)  | 44.8 (12)      |
| C35  | 9299 (6)  | 7361 (5)  | 964 (4)   | 44.5 (12)      |
| C36  | 10442 (6) | 6545 (5)  | 556 (4)   | 44.1 (12)      |
| C37  | 10624 (5) | 5486 (4)  | 787 (4)   | 43.2 (12)      |
| C38  | 11713 (6) | 4551 (5)  | 362 (4)   | 46.7 (12)      |
| C39  | 11794 (6) | 3587 (4)  | 659 (4)   | 47.6 (13)      |
| C40  | 10794 (6) | 3486 (5)  | 1386 (4)  | 46.7 (12)      |
| C41  | 9705 (6)  | 4371 (4)  | 1797 (4)  | 46.4 (12)      |
| C42  | 9592 (6)  | 5388 (4)  | 1510 (4)  | 45.4 (12)      |
| C43  | 4799 (6)  | 10641 (5) | 1298 (4)  | 48.0 (13)      |
| C44  | 5498 (6)  | 11541 (5) | -2 (4)    | 50.6 (13)      |
| C45  | 6689 (6)  | 11289 (5) | -832 (4)  | 53.0 (14)      |
| C46  | 11478 (6) | 6772 (5)  | -155 (4)  | 47.9 (13)      |
| C47  | 11969 (6) | 8052 (5)  | -1089 (4) | 49.8 (13)      |
| C48  | 11375 (6) | 9239 (5)  | -1095 (4) | 52.6 (14)      |
| B1   | 9224 (7)  | 1726 (5)  | 3270 (5)  | 48.9 (15)      |

**Table S4 Anisotropic Displacement Parameters ( $\text{\AA}^2 \times 10^3$ ) for D1. The Anisotropic displacement factor exponent takes the form:  $-2\pi^2[h^2a^*2U_{11}+2hka^*b^*U_{12}+\dots]$ .**

| Atom | $U_{11}$ | $U_{22}$  | $U_{33}$  | $U_{23}$  | $U_{13}$   | $U_{12}$   |
|------|----------|-----------|-----------|-----------|------------|------------|
| Cu1  | 52.3 (5) | 47.3 (5)  | 38.9 (5)  | 9.8 (3)   | -11.7 (4)  | -23.1 (4)  |
| F1   | 60 (2)   | 63 (2)    | 44.4 (18) | 5.9 (15)  | -14.7 (15) | -24.8 (17) |
| F2   | 53 (2)   | 68 (2)    | 49.0 (19) | 3.6 (16)  | -9.6 (16)  | -16.7 (17) |
| F3   | 59 (2)   | 54.5 (19) | 54.7 (19) | 8.5 (15)  | -14.7 (16) | -27.8 (16) |
| F4   | 60 (2)   | 59 (2)    | 63 (2)    | 16.8 (16) | -15.1 (17) | -30.7 (17) |
| O1   | 80 (3)   | 57 (2)    | 47 (2)    | 5.5 (18)  | -21 (2)    | -36 (2)    |
| O2   | 62 (2)   | 54 (2)    | 41 (2)    | 8.2 (17)  | -10.7 (18) | -32 (2)    |
| O3   | 74 (3)   | 65 (3)    | 53 (2)    | 19 (2)    | -32 (2)    | -40 (2)    |
| O4   | 70 (3)   | 56 (2)    | 43 (2)    | 15.5 (18) | -19.4 (19) | -33 (2)    |
| O5   | 50 (3)   | 59 (3)    | 64 (3)    | 22 (2)    | -14 (2)    | -18 (2)    |
| O6   | 57 (2)   | 55 (2)    | 41 (2)    | 15.2 (17) | -14.1 (18) | -23.2 (19) |
| O7   | 56 (3)   | 59 (3)    | 65 (3)    | 20 (2)    | -4 (2)     | -16 (2)    |
| O8   | 53 (2)   | 54 (2)    | 45 (2)    | 11.3 (17) | -5.7 (18)  | -22.5 (19) |
| N1   | 47 (3)   | 47 (2)    | 38 (2)    | 8.9 (18)  | -9.6 (19)  | -21 (2)    |
| N2   | 50 (3)   | 42 (2)    | 39 (2)    | 6.5 (18)  | -9 (2)     | -21 (2)    |
| N3   | 50 (3)   | 45 (2)    | 45 (2)    | 8.1 (19)  | -15 (2)    | -23 (2)    |

**Table S4 Anisotropic Displacement Parameters ( $\text{\AA}^2 \times 10^3$ ) for D1. The Anisotropic displacement factor exponent takes the form:  $-2\pi^2[h^2a^2U_{11}+2hka^*b^*U_{12}+\dots]$ .**

| Atom | $U_{11}$ | $U_{22}$ | $U_{33}$ | $U_{23}$ | $U_{13}$ | $U_{12}$ |
|------|----------|----------|----------|----------|----------|----------|
| N4   | 54 (3)   | 48 (3)   | 35 (2)   | 8.3 (18) | -15 (2)  | -23 (2)  |
| C1   | 44 (3)   | 46 (3)   | 37 (3)   | 1 (2)    | -11 (2)  | -16 (2)  |
| C2   | 55 (3)   | 45 (3)   | 40 (3)   | 9 (2)    | -8 (2)   | -21 (3)  |
| C3   | 60 (4)   | 52 (3)   | 40 (3)   | 9 (2)    | -17 (3)  | -22 (3)  |
| C4   | 55 (3)   | 59 (4)   | 41 (3)   | 2 (3)    | -13 (3)  | -21 (3)  |
| C5   | 54 (3)   | 54 (3)   | 41 (3)   | 3 (2)    | -10 (3)  | -26 (3)  |
| C6   | 46 (3)   | 49 (3)   | 39 (3)   | 6 (2)    | -5 (2)   | -20 (2)  |
| C7   | 45 (3)   | 44 (3)   | 42 (3)   | 5 (2)    | -8 (2)   | -20 (2)  |
| C8   | 47 (3)   | 48 (3)   | 36 (3)   | 7 (2)    | -9 (2)   | -18 (2)  |
| C9   | 45 (3)   | 38 (3)   | 37 (3)   | 6 (2)    | -9 (2)   | -15 (2)  |
| C10  | 44 (3)   | 44 (3)   | 36 (3)   | 4 (2)    | -6 (2)   | -17 (2)  |
| C11  | 46 (3)   | 47 (3)   | 37 (3)   | 3 (2)    | -7 (2)   | -19 (2)  |
| C12  | 43 (3)   | 49 (3)   | 39 (3)   | 7 (2)    | -9 (2)   | -18 (2)  |
| C13  | 48 (3)   | 49 (3)   | 38 (3)   | 7 (2)    | -10 (2)  | -21 (2)  |
| C14  | 58 (3)   | 55 (3)   | 44 (3)   | 10 (2)   | -16 (3)  | -28 (3)  |
| C15  | 52 (3)   | 58 (3)   | 51 (3)   | 4 (3)    | -16 (3)  | -30 (3)  |
| C16  | 57 (3)   | 49 (3)   | 48 (3)   | 7 (2)    | -14 (3)  | -28 (3)  |
| C17  | 50 (3)   | 43 (3)   | 42 (3)   | 7 (2)    | -13 (2)  | -17 (2)  |
| C18  | 41 (3)   | 50 (3)   | 40 (3)   | 4 (2)    | -4 (2)   | -20 (2)  |
| C19  | 51 (3)   | 56 (3)   | 45 (3)   | 10 (3)   | -15 (3)  | -27 (3)  |
| C20  | 66 (4)   | 59 (3)   | 40 (3)   | 7 (2)    | -10 (3)  | -36 (3)  |
| C21  | 68 (4)   | 55 (3)   | 50 (3)   | 14 (3)   | -22 (3)  | -32 (3)  |
| C22  | 50 (3)   | 52 (3)   | 42 (3)   | 5 (2)    | -9 (3)   | -24 (3)  |
| C23  | 66 (4)   | 56 (3)   | 47 (3)   | 17 (3)   | -20 (3)  | -31 (3)  |
| C24  | 74 (5)   | 57 (4)   | 63 (4)   | 19 (3)   | -5 (3)   | -26 (3)  |
| C25  | 49 (3)   | 48 (3)   | 41 (3)   | 5 (2)    | -15 (2)  | -21 (2)  |
| C26  | 54 (3)   | 43 (3)   | 38 (3)   | 8 (2)    | -11 (2)  | -22 (2)  |
| C27  | 55 (3)   | 57 (3)   | 42 (3)   | 9 (2)    | -13 (3)  | -28 (3)  |
| C28  | 49 (3)   | 53 (3)   | 40 (3)   | 4 (2)    | -9 (2)   | -20 (3)  |
| C29  | 54 (3)   | 48 (3)   | 40 (3)   | 4 (2)    | -14 (2)  | -18 (3)  |
| C30  | 55 (3)   | 47 (3)   | 36 (3)   | 7 (2)    | -17 (2)  | -24 (3)  |
| C31  | 60 (4)   | 50 (3)   | 40 (3)   | 6 (2)    | -14 (3)  | -24 (3)  |
| C32  | 48 (3)   | 52 (3)   | 43 (3)   | 5 (2)    | -11 (2)  | -26 (3)  |
| C33  | 49 (3)   | 44 (3)   | 42 (3)   | 9 (2)    | -12 (2)  | -23 (2)  |
| C34  | 50 (3)   | 46 (3)   | 41 (3)   | 11 (2)   | -12 (2)  | -23 (2)  |
| C35  | 53 (3)   | 51 (3)   | 33 (3)   | 9 (2)    | -13 (2)  | -25 (3)  |
| C36  | 49 (3)   | 54 (3)   | 33 (3)   | 10 (2)   | -15 (2)  | -23 (3)  |
| C37  | 44 (3)   | 52 (3)   | 36 (3)   | 7 (2)    | -13 (2)  | -21 (2)  |
| C38  | 51 (3)   | 56 (3)   | 34 (3)   | 6 (2)    | -14 (2)  | -22 (3)  |
| C39  | 53 (3)   | 42 (3)   | 46 (3)   | 2 (2)    | -19 (3)  | -15 (2)  |
| C40  | 55 (3)   | 49 (3)   | 41 (3)   | 7 (2)    | -20 (3)  | -24 (3)  |
| C41  | 54 (3)   | 46 (3)   | 39 (3)   | 9 (2)    | -14 (2)  | -20 (3)  |



**Table S4 Anisotropic Displacement Parameters ( $\text{\AA}^2 \times 10^3$ ) for D1. The Anisotropic displacement factor exponent takes the form:  $-2\pi^2[h^2a^{*2}U_{11}+2hka^*b^*U_{12}+\dots]$ .**

| Atom | $U_{11}$ | $U_{22}$ | $U_{33}$ | $U_{23}$ | $U_{13}$ | $U_{12}$ |
|------|----------|----------|----------|----------|----------|----------|
| C42  | 55 (3)   | 46 (3)   | 38 (3)   | 11 (2)   | -18 (2)  | -22 (3)  |
| C43  | 56 (4)   | 49 (3)   | 43 (3)   | 8 (2)    | -16 (3)  | -24 (3)  |
| C44  | 58 (3)   | 49 (3)   | 48 (3)   | 14 (2)   | -17 (3)  | -24 (3)  |
| C45  | 65 (4)   | 57 (3)   | 40 (3)   | 13 (3)   | -13 (3)  | -29 (3)  |
| C46  | 47 (3)   | 52 (3)   | 42 (3)   | 8 (2)    | -12 (2)  | -18 (3)  |
| C47  | 50 (3)   | 56 (3)   | 40 (3)   | 7 (2)    | -2 (2)   | -25 (3)  |
| C48  | 60 (4)   | 57 (3)   | 42 (3)   | 8 (3)    | -9 (3)   | -29 (3)  |
| B1   | 49 (4)   | 52 (4)   | 47 (3)   | 12 (3)   | -16 (3)  | -21 (3)  |

**Table S5 Bond Lengths for D1.**

| Atom | Atom | Length/ $\text{\AA}$ | Atom | Atom | Length/ $\text{\AA}$ |
|------|------|----------------------|------|------|----------------------|
| Cu1  | N1   | 2.019 (4)            | C8   | C9   | 1.412 (8)            |
| Cu1  | N2   | 2.016 (5)            | C9   | C10  | 1.495 (8)            |
| Cu1  | N3   | 2.015 (5)            | C10  | C11  | 1.400 (8)            |
| Cu1  | N4   | 2.040 (5)            | C11  | C12  | 1.385 (8)            |
| F1   | B1   | 1.411 (8)            | C12  | C13  | 1.422 (8)            |
| F2   | B1   | 1.377 (8)            | C12  | C22  | 1.524 (8)            |
| F3   | B1   | 1.396 (8)            | C13  | C14  | 1.425 (8)            |
| F4   | B1   | 1.394 (7)            | C13  | C18  | 1.433 (8)            |
| O1   | C19  | 1.212 (7)            | C14  | C15  | 1.369 (8)            |
| O2   | C19  | 1.340 (7)            | C15  | C16  | 1.410 (8)            |
| O2   | C20  | 1.457 (7)            | C16  | C17  | 1.361 (8)            |
| O3   | C22  | 1.203 (7)            | C17  | C18  | 1.412 (8)            |
| O4   | C22  | 1.329 (7)            | C20  | C21  | 1.490 (9)            |
| O4   | C23  | 1.460 (7)            | C23  | C24  | 1.491 (10)           |
| O5   | C43  | 1.191 (7)            | C25  | C26  | 1.406 (8)            |
| O6   | C43  | 1.348 (7)            | C25  | C30  | 1.445 (8)            |
| O6   | C44  | 1.446 (6)            | C26  | C27  | 1.374 (9)            |
| O7   | C46  | 1.207 (7)            | C27  | C28  | 1.415 (8)            |
| O8   | C46  | 1.324 (7)            | C28  | C29  | 1.381 (8)            |
| O8   | C47  | 1.469 (6)            | C29  | C30  | 1.406 (8)            |
| N1   | C1   | 1.380 (7)            | C30  | C31  | 1.440 (8)            |
| N1   | C9   | 1.325 (7)            | C31  | C32  | 1.356 (9)            |
| N2   | C10  | 1.330 (7)            | C31  | C43  | 1.506 (8)            |
| N2   | C18  | 1.369 (7)            | C32  | C33  | 1.414 (8)            |
| N3   | C25  | 1.360 (8)            | C33  | C34  | 1.484 (8)            |
| N3   | C33  | 1.341 (7)            | C34  | C35  | 1.420 (8)            |
| N4   | C34  | 1.336 (7)            | C35  | C36  | 1.352 (8)            |
| N4   | C42  | 1.362 (8)            | C36  | C37  | 1.440 (8)            |
| C1   | C2   | 1.429 (8)            | C36  | C46  | 1.512 (8)            |

**Table S5 Bond Lengths for D1.**

| Atom | Atom | Length/Å  | Atom | Atom | Length/Å  |
|------|------|-----------|------|------|-----------|
| C1   | C6   | 1.423 (8) | C37  | C38  | 1.409 (8) |
| C2   | C3   | 1.354 (8) | C37  | C42  | 1.432 (8) |
| C3   | C4   | 1.408 (9) | C38  | C39  | 1.368 (8) |
| C4   | C5   | 1.369 (8) | C39  | C40  | 1.410 (8) |
| C5   | C6   | 1.414 (8) | C40  | C41  | 1.368 (8) |
| C6   | C7   | 1.428 (8) | C41  | C42  | 1.424 (8) |
| C7   | C8   | 1.368 (8) | C44  | C45  | 1.507 (9) |
| C7   | C19  | 1.494 (8) | C47  | C48  | 1.507 (8) |

**Table S6 Bond Angles for D1.**

| Atom | Atom | Atom | Angle/°     | Atom | Atom | Atom | Angle/°   |
|------|------|------|-------------|------|------|------|-----------|
| N1   | Cu1  | N4   | 123.94 (18) | O1   | C19  | O2   | 123.5 (5) |
| N2   | Cu1  | N1   | 80.76 (18)  | O1   | C19  | C7   | 124.7 (5) |
| N2   | Cu1  | N4   | 120.00 (19) | O2   | C19  | C7   | 111.7 (5) |
| N3   | Cu1  | N1   | 124.12 (19) | O2   | C20  | C21  | 111.8 (5) |
| N3   | Cu1  | N2   | 132.49 (19) | O3   | C22  | O4   | 124.7 (5) |
| N3   | Cu1  | N4   | 81.66 (19)  | O3   | C22  | C12  | 124.4 (5) |
| C19  | O2   | C20  | 115.5 (4)   | O4   | C22  | C12  | 110.9 (5) |
| C22  | O4   | C23  | 115.4 (5)   | O4   | C23  | C24  | 112.2 (5) |
| C43  | O6   | C44  | 116.2 (5)   | N3   | C25  | C26  | 117.1 (5) |
| C46  | O8   | C47  | 115.8 (4)   | N3   | C25  | C30  | 123.2 (5) |
| C1   | N1   | Cu1  | 127.3 (4)   | C26  | C25  | C30  | 119.8 (5) |
| C9   | N1   | Cu1  | 113.7 (4)   | C27  | C26  | C25  | 121.1 (5) |
| C9   | N1   | C1   | 118.5 (5)   | C26  | C27  | C28  | 119.2 (5) |
| C10  | N2   | Cu1  | 114.2 (4)   | C29  | C28  | C27  | 121.2 (6) |
| C10  | N2   | C18  | 119.7 (5)   | C28  | C29  | C30  | 120.8 (5) |
| C18  | N2   | Cu1  | 126.0 (3)   | C29  | C30  | C25  | 117.9 (5) |
| C25  | N3   | Cu1  | 127.0 (4)   | C29  | C30  | C31  | 126.3 (5) |
| C33  | N3   | Cu1  | 113.5 (4)   | C31  | C30  | C25  | 115.9 (5) |
| C33  | N3   | C25  | 118.4 (5)   | C30  | C31  | C43  | 121.1 (5) |
| C34  | N4   | Cu1  | 112.1 (4)   | C32  | C31  | C30  | 119.6 (5) |
| C34  | N4   | C42  | 119.4 (5)   | C32  | C31  | C43  | 119.1 (5) |
| C42  | N4   | Cu1  | 128.2 (4)   | C31  | C32  | C33  | 120.6 (5) |
| N1   | C1   | C2   | 117.7 (5)   | N3   | C33  | C32  | 122.3 (5) |
| N1   | C1   | C6   | 122.7 (5)   | N3   | C33  | C34  | 115.3 (5) |
| C6   | C1   | C2   | 119.5 (5)   | C32  | C33  | C34  | 122.2 (5) |
| C3   | C2   | C1   | 119.8 (5)   | N4   | C34  | C33  | 115.6 (5) |
| C2   | C3   | C4   | 121.0 (5)   | N4   | C34  | C35  | 121.0 (5) |
| C5   | C4   | C3   | 120.5 (6)   | C35  | C34  | C33  | 123.3 (5) |
| C4   | C5   | C6   | 120.5 (5)   | C36  | C35  | C34  | 121.1 (5) |
| C1   | C6   | C7   | 116.4 (5)   | C35  | C36  | C37  | 119.3 (5) |

**Table S6 Bond Angles for D1.**

| Atom | Atom | Atom | Angle/°  | Atom | Atom | Atom | Angle/°  |
|------|------|------|----------|------|------|------|----------|
| C5   | C6   | C1   | 118.5(5) | C35  | C36  | C46  | 118.7(5) |
| C5   | C6   | C7   | 125.0(5) | C37  | C36  | C46  | 122.0(5) |
| C6   | C7   | C19  | 120.6(5) | C38  | C37  | C36  | 125.9(5) |
| C8   | C7   | C6   | 119.7(5) | C38  | C37  | C42  | 117.9(5) |
| C8   | C7   | C19  | 119.6(5) | C42  | C37  | C36  | 116.2(5) |
| C7   | C8   | C9   | 120.0(5) | C39  | C38  | C37  | 120.7(5) |
| N1   | C9   | C8   | 122.4(5) | C38  | C39  | C40  | 121.8(6) |
| N1   | C9   | C10  | 115.3(5) | C41  | C40  | C39  | 119.3(5) |
| C8   | C9   | C10  | 122.2(5) | C40  | C41  | C42  | 120.4(5) |
| N2   | C10  | C9   | 114.5(5) | N4   | C42  | C37  | 122.7(5) |
| N2   | C10  | C11  | 122.1(5) | N4   | C42  | C41  | 117.4(5) |
| C11  | C10  | C9   | 123.3(5) | C41  | C42  | C37  | 119.9(5) |
| C12  | C11  | C10  | 120.0(5) | O5   | C43  | O6   | 122.9(5) |
| C11  | C12  | C13  | 119.2(5) | O5   | C43  | C31  | 127.1(5) |
| C11  | C12  | C22  | 118.7(5) | O6   | C43  | C31  | 109.9(5) |
| C13  | C12  | C22  | 122.0(5) | O6   | C44  | C45  | 107.2(5) |
| C12  | C13  | C14  | 125.2(5) | O7   | C46  | O8   | 124.1(5) |
| C12  | C13  | C18  | 117.3(5) | O7   | C46  | C36  | 123.9(5) |
| C14  | C13  | C18  | 117.6(5) | O8   | C46  | C36  | 111.9(5) |
| C15  | C14  | C13  | 120.7(5) | O8   | C47  | C48  | 107.1(5) |
| C14  | C15  | C16  | 121.0(5) | F2   | B1   | F1   | 109.9(5) |
| C17  | C16  | C15  | 120.1(5) | F2   | B1   | F3   | 110.3(5) |
| C16  | C17  | C18  | 120.8(5) | F2   | B1   | F4   | 109.8(5) |
| N2   | C18  | C13  | 121.5(5) | F3   | B1   | F1   | 108.6(5) |
| N2   | C18  | C17  | 118.7(5) | F4   | B1   | F1   | 108.7(5) |
| C17  | C18  | C13  | 119.8(5) | F4   | B1   | F3   | 109.4(5) |

**Table S7 Torsion Angles for D1.**

| A   | B  | C   | D   | Angle/°   | A   | B   | C   | D   | Angle/°   |
|-----|----|-----|-----|-----------|-----|-----|-----|-----|-----------|
| Cu1 | N1 | C1  | C2  | -10.9(7)  | C16 | C17 | C18 | N2  | 178.6(5)  |
| Cu1 | N1 | C1  | C6  | 169.8(4)  | C16 | C17 | C18 | C13 | -1.3(9)   |
| Cu1 | N1 | C9  | C8  | -171.2(4) | C18 | N2  | C10 | C9  | 175.9(5)  |
| Cu1 | N1 | C9  | C10 | 9.2(6)    | C18 | N2  | C10 | C11 | -4.8(8)   |
| Cu1 | N2 | C10 | C9  | -8.4(6)   | C18 | C13 | C14 | C15 | -2.0(9)   |
| Cu1 | N2 | C10 | C11 | 170.8(4)  | C19 | O2  | C20 | C21 | 78.6(6)   |
| Cu1 | N2 | C18 | C13 | -173.4(4) | C19 | C7  | C8  | C9  | 171.0(5)  |
| Cu1 | N2 | C18 | C17 | 6.7(7)    | C20 | O2  | C19 | O1  | 3.0(9)    |
| Cu1 | N3 | C25 | C26 | 12.8(7)   | C20 | O2  | C19 | C7  | -174.6(5) |
| Cu1 | N3 | C25 | C30 | -167.7(4) | C22 | O4  | C23 | C24 | -80.1(7)  |
| Cu1 | N3 | C33 | C32 | 169.5(4)  | C22 | C12 | C13 | C14 | -7.0(9)   |
| Cu1 | N3 | C33 | C34 | -6.0(6)   | C22 | C12 | C13 | C18 | 173.4(5)  |

**Table S7 Torsion Angles for D1.**

| A   | B   | C   | D   | Angle/°    | A   | B   | C   | D   | Angle/°    |
|-----|-----|-----|-----|------------|-----|-----|-----|-----|------------|
| Cu1 | N4  | C34 | C33 | -14.9 (6)  | C23 | O4  | C22 | O3  | -3.3 (9)   |
| Cu1 | N4  | C34 | C35 | 169.2 (4)  | C23 | O4  | C22 | C12 | 175.4 (5)  |
| Cu1 | N4  | C42 | C37 | -172.1 (4) | C25 | N3  | C33 | C32 | 0.9 (8)    |
| Cu1 | N4  | C42 | C41 | 10.6 (7)   | C25 | N3  | C33 | C34 | -174.5 (5) |
| N1  | C1  | C2  | C3  | -179.7 (5) | C25 | C26 | C27 | C28 | -0.4 (9)   |
| N1  | C1  | C6  | C5  | 177.8 (5)  | C25 | C30 | C31 | C32 | -1.8 (8)   |
| N1  | C1  | C6  | C7  | -1.0 (8)   | C25 | C30 | C31 | C43 | 173.0 (5)  |
| N1  | C9  | C10 | N2  | -0.5 (7)   | C26 | C25 | C30 | C29 | 0.4 (8)    |
| N1  | C9  | C10 | C11 | -179.8 (5) | C26 | C25 | C30 | C31 | -179.2 (5) |
| N2  | C10 | C11 | C12 | 3.5 (8)    | C26 | C27 | C28 | C29 | -0.2 (9)   |
| N3  | C25 | C26 | C27 | 179.8 (5)  | C27 | C28 | C29 | C30 | 1.0 (9)    |
| N3  | C25 | C30 | C29 | -179.1 (5) | C28 | C29 | C30 | C25 | -1.0 (8)   |
| N3  | C25 | C30 | C31 | 1.3 (8)    | C28 | C29 | C30 | C31 | 178.5 (5)  |
| N3  | C33 | C34 | N4  | 14.3 (7)   | C29 | C30 | C31 | C32 | 178.6 (5)  |
| N3  | C33 | C34 | C35 | -169.9 (5) | C29 | C30 | C31 | C43 | -6.6 (9)   |
| N4  | C34 | C35 | C36 | 3.8 (8)    | C30 | C25 | C26 | C27 | 0.3 (8)    |
| C1  | N1  | C9  | C8  | 1.7 (8)    | C30 | C31 | C32 | C33 | 2.0 (8)    |
| C1  | N1  | C9  | C10 | -177.9 (5) | C30 | C31 | C43 | O5  | -9.2 (9)   |
| C1  | C2  | C3  | C4  | 2.6 (9)    | C30 | C31 | C43 | O6  | 175.2 (5)  |
| C1  | C6  | C7  | C8  | 4.5 (8)    | C31 | C32 | C33 | N3  | -1.5 (9)   |
| C1  | C6  | C7  | C19 | -171.5 (5) | C31 | C32 | C33 | C34 | 173.6 (5)  |
| C2  | C1  | C6  | C5  | -1.5 (8)   | C32 | C31 | C43 | O5  | 165.6 (6)  |
| C2  | C1  | C6  | C7  | 179.7 (5)  | C32 | C31 | C43 | O6  | -9.9 (7)   |
| C2  | C3  | C4  | C5  | -3.0 (9)   | C32 | C33 | C34 | N4  | -161.1 (5) |
| C3  | C4  | C5  | C6  | 1.0 (9)    | C32 | C33 | C34 | C35 | 14.7 (9)   |
| C4  | C5  | C6  | C1  | 1.2 (9)    | C33 | N3  | C25 | C26 | 179.6 (5)  |
| C4  | C5  | C6  | C7  | 179.9 (6)  | C33 | N3  | C25 | C30 | -0.9 (8)   |
| C5  | C6  | C7  | C8  | -174.3 (6) | C33 | C34 | C35 | C36 | -171.8 (5) |
| C5  | C6  | C7  | C19 | 9.8 (9)    | C34 | N4  | C42 | C37 | 0.8 (8)    |
| C6  | C1  | C2  | C3  | -0.4 (9)   | C34 | N4  | C42 | C41 | -176.5 (5) |
| C6  | C7  | C8  | C9  | -4.9 (8)   | C34 | C35 | C36 | C37 | 1.5 (8)    |
| C6  | C7  | C19 | O1  | 27.7 (9)   | C34 | C35 | C36 | C46 | 179.6 (5)  |
| C6  | C7  | C19 | O2  | -154.8 (5) | C35 | C36 | C37 | C38 | 174.5 (5)  |
| C7  | C8  | C9  | N1  | 1.8 (8)    | C35 | C36 | C37 | C42 | -5.1 (7)   |
| C7  | C8  | C9  | C10 | -178.6 (5) | C35 | C36 | C46 | O7  | 170.7 (6)  |
| C8  | C7  | C19 | O1  | -148.3 (6) | C35 | C36 | C46 | O8  | -7.0 (7)   |
| C8  | C7  | C19 | O2  | 29.2 (8)   | C36 | C37 | C38 | C39 | 178.2 (5)  |
| C8  | C9  | C10 | N2  | 179.9 (5)  | C36 | C37 | C42 | N4  | 4.1 (8)    |
| C8  | C9  | C10 | C11 | 0.6 (8)    | C36 | C37 | C42 | C41 | -178.6 (5) |
| C9  | N1  | C1  | C2  | 177.3 (5)  | C37 | C36 | C46 | O7  | -11.2 (9)  |
| C9  | N1  | C1  | C6  | -2.0 (8)   | C37 | C36 | C46 | O8  | 171.2 (5)  |
| C9  | C10 | C11 | C12 | -177.3 (5) | C37 | C38 | C39 | C40 | 0.9 (9)    |
| C10 | N2  | C18 | C13 | 1.7 (8)    | C38 | C37 | C42 | N4  | -175.5 (5) |

**Table S7 Torsion Angles for D1.**

| A   | B   | C   | D   | Angle/°    | A   | B   | C   | D   | Angle/°    |
|-----|-----|-----|-----|------------|-----|-----|-----|-----|------------|
| C10 | N2  | C18 | C17 | -178.2 (5) | C38 | C37 | C42 | C41 | 1.7 (8)    |
| C10 | C11 | C12 | C13 | 1.1 (8)    | C38 | C39 | C40 | C41 | 0.9 (8)    |
| C10 | C11 | C12 | C22 | -176.3 (5) | C39 | C40 | C41 | C42 | -1.3 (8)   |
| C11 | C12 | C13 | C14 | 175.7 (5)  | C40 | C41 | C42 | N4  | 177.4 (5)  |
| C11 | C12 | C13 | C18 | -3.9 (8)   | C40 | C41 | C42 | C37 | 0.0 (8)    |
| C11 | C12 | C22 | O3  | 177.2 (6)  | C42 | N4  | C34 | C33 | 171.0 (5)  |
| C11 | C12 | C22 | O4  | -1.5 (7)   | C42 | N4  | C34 | C35 | -4.9 (8)   |
| C12 | C13 | C14 | C15 | 178.5 (6)  | C42 | C37 | C38 | C39 | -2.2 (8)   |
| C12 | C13 | C18 | N2  | 2.6 (8)    | C43 | O6  | C44 | C45 | -163.8 (5) |
| C12 | C13 | C18 | C17 | -177.5 (5) | C43 | C31 | C32 | C33 | -173.0 (5) |
| C13 | C12 | C22 | O3  | -0.2 (9)   | C44 | O6  | C43 | O5  | -0.4 (8)   |
| C13 | C12 | C22 | O4  | -178.8 (5) | C44 | O6  | C43 | C31 | 175.4 (5)  |
| C13 | C14 | C15 | C16 | -0.6 (10)  | C46 | O8  | C47 | C48 | -170.8 (5) |
| C14 | C13 | C18 | N2  | -177.0 (5) | C46 | C36 | C37 | C38 | -3.7 (8)   |
| C14 | C13 | C18 | C17 | 2.9 (8)    | C46 | C36 | C37 | C42 | 176.8 (5)  |
| C14 | C15 | C16 | C17 | 2.3 (9)    | C47 | O8  | C46 | O7  | 5.5 (9)    |
| C15 | C16 | C17 | C18 | -1.3 (9)   | C47 | O8  | C46 | C36 | -176.9 (5) |

**Table S8 Hydrogen Atom Coordinates ( $\text{\AA} \times 10^4$ ) and Isotropic Displacement Parameters ( $\text{\AA}^2 \times 10^3$ ) for D1.**

| Atom | x        | y       | z       | U(eq) |
|------|----------|---------|---------|-------|
| H2   | 5376.22  | 6480.49 | 1830.55 | 57    |
| H3   | 4269.7   | 6316.89 | 770.64  | 60    |
| H4   | 3518.56  | 4976.82 | 873.19  | 63    |
| H5   | 4041.57  | 3699.97 | 1946.92 | 59    |
| H8   | 6219.61  | 3262.51 | 4387.86 | 54    |
| H11  | 7286.92  | 3541.04 | 5292.5  | 53    |
| H14  | 8994.8   | 5423.45 | 6844.72 | 60    |
| H15  | 9321.3   | 6940.68 | 6513.97 | 61    |
| H16  | 8857.67  | 7819.24 | 5139.42 | 59    |
| H17  | 7941.14  | 7234.87 | 4156.38 | 55    |
| H20A | 4455.21  | 1143.66 | 3794.03 | 63    |
| H20B | 4662.02  | 1074.31 | 4863.66 | 63    |
| H21A | 6687.06  | 338.9   | 3120.49 | 81    |
| H21B | 6240.04  | -402.86 | 3860.59 | 81    |
| H21C | 6907.91  | 287.69  | 4184.58 | 81    |
| H23A | 8176.61  | 1626.35 | 7305.52 | 65    |
| H23B | 8583.49  | 2402.55 | 7821.64 | 65    |
| H24A | 10212.72 | 1054.69 | 6115.99 | 101   |
| H24B | 10332.62 | 749.17  | 7184.87 | 101   |
| H24C | 10610.61 | 1732.59 | 6759.98 | 101   |

**Table S8 Hydrogen Atom Coordinates ( $\text{\AA}\times 10^4$ ) and Isotropic Displacement Parameters ( $\text{\AA}^2\times 10^3$ ) for D1.**

| Atom | <i>x</i> | <i>y</i> | <i>z</i> | U(eq) |
|------|----------|----------|----------|-------|
| H26  | 4499.93  | 7553.07  | 4097.25  | 54    |
| H27  | 2333.38  | 8664.31  | 4719.95  | 60    |
| H28  | 1444.95  | 10293.28 | 4060.2   | 58    |
| H29  | 2709.57  | 10806.5  | 2808.74  | 58    |
| H32  | 7108.1   | 9137.26  | 1050.94  | 55    |
| H35  | 9169.03  | 8058.35  | 801.69   | 53    |
| H38  | 12398.09 | 4591.44  | -136.1   | 56    |
| H39  | 12543.74 | 2969.62  | 368.42   | 57    |
| H40  | 10876.39 | 2808.99  | 1587.53  | 56    |
| H41  | 9019.53  | 4307.14  | 2277.6   | 56    |
| H44A | 5244.14  | 12237.29 | 345.05   | 61    |
| H44B | 4771.84  | 11565.57 | -247.12  | 61    |
| H45A | 6470.5   | 11755.6  | -1344.88 | 79    |
| H45B | 7022.13  | 10550.02 | -1093.11 | 79    |
| H45C | 7348.07  | 11396.82 | -599.74  | 79    |
| H47A | 12133.62 | 7708.95  | -1738.98 | 60    |
| H47B | 12799.32 | 7816.04  | -915.81  | 60    |
| H48A | 11968.02 | 9458.68  | -1567.91 | 79    |
| H48B | 11209.65 | 9568.87  | -446.06  | 79    |
| H48C | 10559.4  | 9461.6   | -1273.86 | 79    |

#### 4.1. Crystal structure determination of D1

**Crystal Data** for  $\text{C}_{48}\text{H}_{40}\text{BCuF}_4\text{N}_4\text{O}_8$  ( $M=951.19$  g/mol): triclinic, space group P-1 (no. 2),  $a = 11.7561(8)$   $\text{\AA}$ ,  $b = 13.8748(10)$   $\text{\AA}$ ,  $c = 14.2785(10)$   $\text{\AA}$ ,  $\alpha = 88.744(3)^\circ$ ,  $\beta = 75.329(4)^\circ$ ,  $\gamma = 66.116(3)^\circ$ ,  $V = 2051.6(3)$   $\text{\AA}^3$ ,  $Z = 2$ ,  $T = 100.00$  K,  $\mu(\text{CuK}\alpha) = 1.459$   $\text{mm}^{-1}$ ,  $D_{\text{calc}} = 1.540$   $\text{g/cm}^3$ , 26569 reflections measured ( $6.426^\circ \leq 2\theta \leq 133.914^\circ$ ), 7071 unique ( $R_{\text{int}} = 0.0790$ ,  $R_{\text{sigma}} = 0.0586$ ) which were used in all calculations. The final  $R_1$  was 0.0902 ( $I > 2\sigma(I)$ ) and  $wR_2$  was 0.2747 (all data).

#### 5. Crystallography data for complex D2

**Table S9 Crystal data and structure refinement for D2.**

| Identification code | <b>D2</b>                                                               |
|---------------------|-------------------------------------------------------------------------|
| Empirical formula   | $\text{C}_{63}\text{H}_{52}\text{BCuF}_4\text{N}_2\text{O}_5\text{P}_2$ |
| Formula weight      | 1129.35                                                                 |
| Temperature/K       | 100.00                                                                  |
| Crystal system      | triclinic                                                               |
| Space group         | P-1                                                                     |
| $a/\text{\AA}$      | 11.2410(5)                                                              |
| $b/\text{\AA}$      | 14.6532(8)                                                              |
| $c/\text{\AA}$      | 18.4225(8)                                                              |
| $\alpha/^\circ$     | 73.672(3)                                                               |
| $\beta/^\circ$      | 86.086(3)                                                               |
| $\gamma/^\circ$     | 70.147(3)                                                               |

|                                             |                                                                   |
|---------------------------------------------|-------------------------------------------------------------------|
| Volume/Å <sup>3</sup>                       | 2737.8(2)                                                         |
| Z                                           | 2                                                                 |
| $\rho_{\text{calc}}/\text{cm}^3$            | 1.370                                                             |
| $\mu/\text{mm}^{-1}$                        | 1.668                                                             |
| F(000)                                      | 1168.0                                                            |
| Crystal size/mm <sup>3</sup>                | 0.23 × 0.12 × 0.02                                                |
| Radiation                                   | CuK $\alpha$ ( $\lambda = 1.54178$ )                              |
| 2 $\Theta$ range for data collection/°      | 5 to 141.634                                                      |
| Index ranges                                | -13 ≤ h ≤ 12, -17 ≤ k ≤ 17, -22 ≤ l ≤ 22                          |
| Reflections collected                       | 57710                                                             |
| Independent reflections                     | 10363 [ $R_{\text{int}} = 0.1112$ , $R_{\text{sigma}} = 0.0731$ ] |
| Data/restraints/parameters                  | 10363/890/911                                                     |
| Goodness-of-fit on F <sup>2</sup>           | 1.031                                                             |
| Final R indexes [ $I \geq 2\sigma(I)$ ]     | $R_1 = 0.0962$ , $wR_2 = 0.2518$                                  |
| Final R indexes [all data]                  | $R_1 = 0.1429$ , $wR_2 = 0.3004$                                  |
| Largest diff. peak/hole / e Å <sup>-3</sup> | 1.08/-0.81                                                        |

**Table S10 Fractional Atomic Coordinates ( $\times 10^4$ ) and Equivalent Isotropic Displacement Parameters ( $\text{\AA}^2 \times 10^3$ ) for D2.  $U_{\text{eq}}$  is defined as 1/3 of the trace of the orthogonalised  $U_{ij}$  tensor.**

| Atom | x           | y           | z          | U(eq)     |
|------|-------------|-------------|------------|-----------|
| Cu1  | 1324.6 (7)  | 4072.9 (7)  | 2705.1 (4) | 42.3 (3)  |
| P1   | 3196.2 (14) | 2886.5 (14) | 3185.7 (8) | 50.1 (4)  |
| P2   | -24.5 (15)  | 3557.8 (14) | 2175.2 (9) | 51.0 (4)  |
| O1   | 2473 (4)    | 2266 (3)    | 1959 (2)   | 49.5 (10) |
| O2   | 2634 (5)    | 8561 (4)    | 732 (4)    | 84.6 (18) |
| O3   | 612 (5)     | 9103 (4)    | 1063 (3)   | 73.3 (15) |
| N1   | 1473 (4)    | 5430 (4)    | 2024 (3)   | 44.8 (11) |
| N2   | 291 (5)     | 5058 (5)    | 3327 (3)   | 51.2 (11) |
| C1   | 4173 (6)    | 3347 (6)    | 3651 (3)   | 58.6 (16) |
| C2   | 4022 (7)    | 4347 (7)    | 3414 (4)   | 73.2 (19) |
| C3   | 4727 (7)    | 4769 (9)    | 3722 (5)   | 86 (2)    |
| C4   | 5584 (8)    | 4157 (10)   | 4309 (5)   | 93 (3)    |
| C5   | 5703 (10)   | 3213 (12)   | 4570 (6)   | 109 (3)   |
| C6   | 5004 (8)    | 2783 (9)    | 4257 (4)   | 87 (2)    |
| C7   | 3110 (7)    | 1724 (7)    | 3850 (4)   | 72.9 (19) |
| C13  | 4261 (6)    | 2408 (5)    | 2474 (3)   | 52.8 (15) |
| C14  | 5552 (6)    | 2312 (7)    | 2440 (4)   | 75 (2)    |
| C15  | 6257 (7)    | 1990 (7)    | 1853 (4)   | 73 (2)    |
| C16  | 5720 (6)    | 1774 (6)    | 1300 (4)   | 58.8 (16) |
| C17  | 4438 (6)    | 1873 (5)    | 1307 (4)   | 50.3 (14) |
| C18  | 3761 (6)    | 2168 (5)    | 1907 (3)   | 47.0 (13) |
| C19  | 2400 (6)    | 2401 (6)    | 627 (4)    | 59.2 (16) |

**Table S10 Fractional Atomic Coordinates ( $\times 10^4$ ) and Equivalent Isotropic Displacement Parameters ( $\text{\AA}^2 \times 10^3$ ) for D2.  $U_{\text{eq}}$  is defined as 1/3 of the trace of the orthogonalised  $U_{ij}$  tensor.**

| Atom | <i>x</i>   | <i>y</i>  | <i>z</i>  | $U(\text{eq})$ |
|------|------------|-----------|-----------|----------------|
| C20  | 1699 (7)   | 2837 (8)  | -31 (4)   | 76 (2)         |
| C21  | 454 (7)    | 3504 (9)  | -68 (5)   | 87 (3)         |
| C22  | -126 (7)   | 3714 (7)  | 593 (4)   | 68 (2)         |
| C23  | 565 (6)    | 3276 (6)  | 1279 (4)  | 52.2 (14)      |
| C24  | 1815 (6)   | 2644 (5)  | 1277 (4)  | 50.6 (14)      |
| C25  | 3747 (7)   | 1650 (6)  | 719 (4)   | 60.3 (16)      |
| C26  | 3707 (9)   | 571 (7)   | 1025 (6)  | 90 (3)         |
| C27  | 4432 (7)   | 1727 (7)  | -31 (4)   | 68 (2)         |
| C28  | -1642 (6)  | 4450 (7)  | 1947 (4)  | 64.1 (17)      |
| C29  | -2656 (8)  | 4182 (10) | 1839 (7)  | 115 (4)        |
| C30  | -3911 (8)  | 4905 (11) | 1731 (7)  | 114 (3)        |
| C31  | -4130 (9)  | 5816 (11) | 1741 (5)  | 110 (3)        |
| C32  | -3135 (8)  | 6125 (10) | 1829 (5)  | 100 (3)        |
| C33  | -1902 (7)  | 5427 (8)  | 1928 (4)  | 76 (2)         |
| C40  | 2158 (5)   | 5595 (5)  | 1378 (3)  | 43.2 (12)      |
| C41  | 2713 (5)   | 4776 (5)  | 1061 (3)  | 43.3 (12)      |
| C42  | 3340 (6)   | 4908 (5)  | 399 (4)   | 47.5 (13)      |
| C43  | 3477 (6)   | 5843 (5)  | 41 (4)    | 52.6 (15)      |
| C44  | 2947 (6)   | 6653 (5)  | 331 (4)   | 52.1 (14)      |
| C45  | 2265 (6)   | 6548 (5)  | 1009 (4)  | 49.7 (14)      |
| C46  | 1610 (7)   | 7366 (6)  | 1325 (5)  | 65.3 (18)      |
| C47  | 923 (9)    | 7172 (6)  | 1963 (6)  | 83 (3)         |
| C48  | 841 (7)    | 6208 (6)  | 2293 (4)  | 61.4 (17)      |
| C49  | 1703 (8)   | 8402 (6)  | 998 (5)   | 70 (2)         |
| C50  | 635 (8)    | 10134 (6) | 883 (6)   | 74 (2)         |
| C51  | -696 (8)   | 10788 (6) | 978 (6)   | 80 (2)         |
| O4A  | -3839 (12) | 7492 (10) | 3993 (8)  | 120 (5)        |
| O5A  | -3740 (20) | 7860 (20) | 2847 (12) | 229 (12)       |
| C8A  | 2827 (13)  | 1817 (13) | 4666 (7)  | 87 (4)         |
| C9A  | 2622 (15)  | 1010 (15) | 5204 (9)  | 105 (5)        |
| C10A | 2681 (16)  | 153 (15)  | 4984 (9)  | 105 (5)        |
| C11A | 2770 (30)  | 161 (16)  | 4206 (12) | 125 (8)        |
| C12A | 3092 (17)  | 958 (12)  | 3699 (8)  | 94 (4)         |
| C34A | 90 (20)    | 2200 (20) | 2944 (16) | 43 (5)         |
| C35A | 450 (30)   | 1270 (20) | 2792 (18) | 48 (6)         |
| C36A | 410 (30)   | 370 (30)  | 3314 (19) | 67 (8)         |
| C37A | 20 (30)    | 410 (20)  | 4027 (18) | 65 (7)         |
| C38A | -380 (30)  | 1330 (20) | 4197 (16) | 59 (6)         |
| C39A | -370 (30)  | 2170 (20) | 3684 (15) | 54 (6)         |
| C52A | -77 (14)   | 6012 (9)  | 2882 (8)  | 59 (5)         |
| C53A | -1188 (14) | 6828 (12) | 2942 (9)  | 81 (4)         |



**Table S10 Fractional Atomic Coordinates ( $\times 10^4$ ) and Equivalent Isotropic Displacement Parameters ( $\text{\AA}^2 \times 10^3$ ) for D2.  $U_{\text{eq}}$  is defined as 1/3 of the trace of the orthogonalised  $U_{ij}$  tensor.**

| Atom | $x$        | $y$       | $z$       | $U(\text{eq})$ |
|------|------------|-----------|-----------|----------------|
| C54A | -1962 (13) | 6626 (11) | 3511 (8)  | 78 (4)         |
| C55A | -1601 (12) | 5677 (11) | 4054 (7)  | 56 (3)         |
| C56A | -2269 (16) | 5438 (15) | 4703 (9)  | 66 (5)         |
| C57A | -1837 (17) | 4515 (16) | 5191 (10) | 61 (5)         |
| C58A | -745 (15)  | 3759 (13) | 5046 (8)  | 57 (4)         |
| C59A | -44 (13)   | 3961 (11) | 4433 (7)  | 49 (3)         |
| C60A | -500 (20)  | 4920 (11) | 3917 (13) | 51 (4)         |
| C61A | -3176 (19) | 7515 (16) | 3548 (11) | 119 (7)        |
| C62A | -5270 (20) | 8624 (17) | 2744 (13) | 124 (7)        |
| C63A | -6260 (30) | 8350 (20) | 3359 (15) | 151 (9)        |
| O4B  | -2444 (19) | 7248 (15) | 4892 (10) | 142 (5)        |
| O5B  | -2770 (20) | 8276 (16) | 3542 (12) | 142 (5)        |
| C8B  | 1958 (19)  | 1485 (16) | 3929 (10) | 62 (5)         |
| C9B  | 1860 (30)  | 580 (20)  | 4344 (18) | 97 (9)         |
| C10B | 3030 (30)  | -230 (30) | 4540 (18) | 92 (8)         |
| C11B | 4130 (30)  | -150 (20) | 4385 (14) | 92 (7)         |
| C12B | 4210 (20)  | 799 (18)  | 3975 (11) | 76 (6)         |
| C34B | -414 (12)  | 2483 (9)  | 2665 (7)  | 54 (3)         |
| C35B | 41 (12)    | 1567 (9)  | 2492 (7)  | 55 (3)         |
| C36B | -174 (14)  | 711 (10)  | 2931 (9)  | 81 (4)         |
| C37B | -855 (19)  | 782 (13)  | 3586 (11) | 115 (7)        |
| C38B | -1300 (20) | 1679 (13) | 3796 (11) | 131 (9)        |
| C39B | -1122 (18) | 2545 (12) | 3325 (9)  | 95 (5)         |
| C52B | 222 (15)   | 5999 (10) | 3029 (9)  | 49 (4)         |
| C53B | -706 (13)  | 6739 (12) | 3313 (9)  | 58 (3)         |
| C54B | -1394 (16) | 6468 (13) | 3938 (11) | 74 (4)         |
| C55B | -1246 (14) | 5451 (13) | 4304 (9)  | 55 (3)         |
| C56B | -1974 (18) | 5153 (17) | 4916 (12) | 59 (5)         |
| C57B | -1680 (20) | 4155 (18) | 5256 (12) | 61 (5)         |
| C58B | -760 (30)  | 3417 (17) | 4968 (11) | 80 (7)         |
| C59B | -160 (20)  | 3711 (14) | 4325 (9)  | 63 (5)         |
| C60B | -320 (30)  | 4736 (14) | 3991 (14) | 51 (5)         |
| C61B | -2230 (30) | 7280 (20) | 4299 (15) | 142 (5)        |
| C62B | -3590 (30) | 9556 (19) | 3413 (16) | 142 (5)        |
| C63B | -4480 (30) | 9440 (20) | 2797 (17) | 142 (5)        |
| F1   | 2392 (15)  | 7035 (7)  | 3225 (6)  | 239 (6)        |
| F2   | 2152 (12)  | 8166 (7)  | 3887 (5)  | 196 (4)        |
| F3   | 1996 (9)   | 8693 (5)  | 2543 (4)  | 169 (3)        |
| F4   | 430 (13)   | 8156 (7)  | 3333 (5)  | 182 (4)        |
| B1   | 1850 (30)  | 7958 (13) | 3283 (12) | 170 (5)        |

**Table S11 Anisotropic Displacement Parameters ( $\text{\AA}^2 \times 10^3$ ) for D2. The Anisotropic displacement factor exponent takes the form:  $-2\pi^2[h^2a^{*2}U_{11}+2hka^*b^*U_{12}+\dots]$ .**

| Atom | $U_{11}$ | $U_{22}$ | $U_{33}$ | $U_{23}$  | $U_{13}$ | $U_{12}$  |
|------|----------|----------|----------|-----------|----------|-----------|
| Cu1  | 37.6(5)  | 58.8(6)  | 30.8(4)  | -20.5(4)  | 4.3(3)   | -10.7(4)  |
| P1   | 39.3(8)  | 72.4(11) | 28.2(7)  | -13.7(7)  | 4.7(6)   | -6.3(7)   |
| P2   | 45.8(8)  | 77.2(11) | 48.7(9)  | -38.2(8)  | 22.0(7)  | -31.0(8)  |
| O1   | 47(2)    | 59(3)    | 47(2)    | -23.7(19) | 19.5(17) | -19.0(18) |
| O2   | 64(3)    | 63(3)    | 144(5)   | -52(3)    | 30(3)    | -29(3)    |
| O3   | 69(3)    | 52(3)    | 106(4)   | -37(3)    | 31(3)    | -22(2)    |
| N1   | 38(2)    | 55(3)    | 47(2)    | -29(2)    | 6.1(19)  | -11(2)    |
| N2   | 38(2)    | 82(3)    | 45(2)    | -40(2)    | 5.6(19)  | -17(2)    |
| C1   | 36(3)    | 103(4)   | 31(3)    | -27(3)    | 6(2)     | -11(3)    |
| C2   | 52(4)    | 112(5)   | 58(4)    | -35(4)    | -11(3)   | -19(4)    |
| C3   | 53(4)    | 148(7)   | 77(5)    | -61(5)    | 3(3)     | -34(4)    |
| C4   | 52(4)    | 179(7)   | 64(5)    | -66(5)    | 9(3)     | -33(5)    |
| C5   | 86(6)    | 180(8)   | 60(5)    | -39(5)    | -23(4)   | -35(6)    |
| C6   | 71(5)    | 133(6)   | 44(4)    | -19(4)    | -15(3)   | -18(4)    |
| C7   | 57(4)    | 82(4)    | 50(3)    | 3(3)      | 8(3)     | -5(3)     |
| C13  | 42(3)    | 70(4)    | 37(3)    | -14(3)    | 8(2)     | -9(3)     |
| C14  | 39(3)    | 128(7)   | 51(4)    | -36(4)    | 8(3)     | -11(3)    |
| C15  | 43(3)    | 103(6)   | 64(4)    | -33(4)    | 15(3)    | -9(3)     |
| C16  | 49(3)    | 72(4)    | 51(3)    | -23(3)    | 19(3)    | -14(3)    |
| C17  | 51(3)    | 50(3)    | 48(3)    | -19(3)    | 19(2)    | -15(3)    |
| C18  | 40(3)    | 52(3)    | 44(3)    | -13(2)    | 12(2)    | -11(2)    |
| C19  | 52(3)    | 91(4)    | 63(3)    | -52(3)    | 27(2)    | -39(3)    |
| C20  | 56(3)    | 146(6)   | 61(4)    | -69(4)    | 26(3)    | -49(4)    |
| C21  | 50(4)    | 174(8)   | 62(4)    | -72(5)    | 16(3)    | -40(4)    |
| C22  | 48(3)    | 125(6)   | 56(3)    | -56(4)    | 18(3)    | -37(4)    |
| C23  | 48(3)    | 82(4)    | 51(3)    | -42(3)    | 21(2)    | -37(3)    |
| C24  | 48(3)    | 71(4)    | 52(3)    | -36(3)    | 19(2)    | -32(3)    |
| C25  | 55(3)    | 79(4)    | 67(4)    | -45(3)    | 32(3)    | -33(3)    |
| C26  | 93(6)    | 82(5)    | 125(7)   | -62(4)    | 63(5)    | -51(4)    |
| C27  | 52(4)    | 108(6)   | 69(4)    | -58(4)    | 30(3)    | -36(4)    |
| C28  | 36(3)    | 126(5)   | 49(3)    | -57(3)    | 15(2)    | -26(3)    |
| C29  | 45(4)    | 190(8)   | 166(9)   | -134(7)   | 36(4)    | -48(4)    |
| C30  | 38(4)    | 216(9)   | 126(8)   | -118(7)   | 23(4)    | -36(5)    |
| C31  | 56(4)    | 208(9)   | 75(5)    | -87(6)    | 5(4)     | -17(5)    |
| C32  | 54(4)    | 143(7)   | 84(6)    | -41(5)    | -15(4)   | 3(4)      |
| C33  | 43(3)    | 125(5)   | 59(4)    | -37(4)    | -6(3)    | -14(3)    |
| C40  | 32(3)    | 54(3)    | 50(3)    | -26(2)    | 3(2)     | -13(2)    |
| C41  | 33(3)    | 51(3)    | 51(3)    | -24(2)    | 8(2)     | -13(2)    |
| C42  | 42(3)    | 50(3)    | 58(3)    | -28(3)    | 16(3)    | -16(2)    |
| C43  | 41(3)    | 57(3)    | 63(4)    | -24(3)    | 20(3)    | -17(3)    |

**Table S11 Anisotropic Displacement Parameters ( $\text{\AA}^2 \times 10^3$ ) for D2. The Anisotropic displacement factor exponent takes the form:  $-2\pi^2[h^2a^{*2}U_{11}+2hka^*b^*U_{12}+\dots]$ .**

| Atom | $U_{11}$ | $U_{22}$ | $U_{33}$ | $U_{23}$ | $U_{13}$ | $U_{12}$ |
|------|----------|----------|----------|----------|----------|----------|
| C44  | 39 (3)   | 51 (3)   | 71 (4)   | -24 (3)  | 11 (3)   | -16 (3)  |
| C45  | 37 (3)   | 52 (3)   | 66 (3)   | -25 (3)  | 8 (2)    | -15 (2)  |
| C46  | 54 (4)   | 56 (3)   | 93 (5)   | -39 (3)  | 18 (3)   | -16 (3)  |
| C47  | 91 (6)   | 60 (4)   | 106 (5)  | -48 (4)  | 44 (5)   | -21 (4)  |
| C48  | 61 (4)   | 61 (3)   | 70 (4)   | -41 (3)  | 22 (3)   | -15 (3)  |
| C49  | 62 (4)   | 60 (4)   | 100 (5)  | -42 (3)  | 21 (4)   | -21 (3)  |
| C50  | 77 (5)   | 52 (4)   | 100 (6)  | -35 (4)  | 26 (4)   | -22 (3)  |
| C51  | 77 (5)   | 52 (4)   | 102 (6)  | -26 (4)  | 34 (4)   | -14 (3)  |
| O4A  | 78 (7)   | 107 (9)  | 118 (8)  | -7 (7)   | 31 (6)   | 15 (6)   |
| O5A  | 143 (10) | 280 (20) | 125 (9)  | -25 (9)  | 10 (7)   | 70 (12)  |
| C8A  | 74 (8)   | 137 (9)  | 52 (5)   | -20 (5)  | 25 (5)   | -48 (7)  |
| C9A  | 100 (11) | 144 (10) | 66 (7)   | -12 (6)  | 43 (7)   | -54 (9)  |
| C10A | 93 (10)  | 121 (9)  | 71 (7)   | 0 (6)    | 28 (7)   | -25 (8)  |
| C11A | 190 (20) | 92 (10)  | 73 (8)   | -3 (6)   | 39 (9)   | -43 (12) |
| C12A | 123 (12) | 81 (6)   | 53 (6)   | -5 (5)   | 23 (6)   | -16 (7)  |
| C34A | 27 (10)  | 69 (8)   | 48 (7)   | -29 (6)  | 10 (6)   | -28 (7)  |
| C35A | 43 (14)  | 67 (9)   | 49 (10)  | -27 (7)  | 9 (9)    | -29 (8)  |
| C36A | 72 (19)  | 69 (10)  | 64 (10)  | -19 (8)  | 21 (10)  | -33 (10) |
| C37A | 62 (16)  | 77 (11)  | 62 (11)  | -19 (8)  | 19 (10)  | -35 (10) |
| C38A | 49 (13)  | 77 (10)  | 56 (9)   | -15 (7)  | 7 (8)    | -32 (9)  |
| C39A | 55 (14)  | 69 (10)  | 47 (8)   | -22 (7)  | 11 (8)   | -30 (9)  |
| C52A | 51 (7)   | 79 (5)   | 60 (6)   | -46 (4)  | 11 (6)   | -19 (4)  |
| C53A | 74 (7)   | 93 (7)   | 58 (7)   | -35 (6)  | 19 (6)   | 1 (6)    |
| C54A | 63 (6)   | 96 (7)   | 50 (6)   | -30 (5)  | 13 (5)   | 10 (5)   |
| C55A | 36 (6)   | 95 (6)   | 41 (5)   | -40 (4)  | -5 (4)   | -7 (4)   |
| C56A | 40 (8)   | 104 (9)  | 49 (6)   | -39 (5)  | 5 (6)    | -2 (6)   |
| C57A | 41 (7)   | 104 (9)  | 40 (6)   | -47 (7)  | 4 (5)    | -6 (7)   |
| C58A | 46 (6)   | 89 (8)   | 40 (6)   | -37 (5)  | 13 (4)   | -14 (6)  |
| C59A | 38 (5)   | 84 (7)   | 37 (5)   | -41 (5)  | 4 (4)    | -16 (5)  |
| C60A | 34 (7)   | 85 (6)   | 42 (5)   | -39 (4)  | 1 (5)    | -12 (5)  |
| C61A | 91 (8)   | 107 (10) | 83 (8)   | -4 (7)   | 34 (6)   | 38 (7)   |
| C62A | 129 (11) | 97 (13)  | 109 (13) | -27 (11) | 2 (9)    | 8 (9)    |
| C63A | 164 (16) | 180 (20) | 120 (16) | -75 (15) | 10 (13)  | -41 (16) |
| O4B  | 137 (9)  | 138 (8)  | 128 (8)  | -76 (6)  | 58 (7)   | 4 (6)    |
| O5B  | 137 (9)  | 138 (8)  | 128 (8)  | -76 (6)  | 58 (7)   | 4 (6)    |
| C8B  | 57 (7)   | 69 (9)   | 30 (8)   | 6 (6)    | 9 (6)    | -2 (6)   |
| C9B  | 66 (10)  | 74 (9)   | 100 (19) | 24 (9)   | 24 (9)   | -4 (7)   |
| C10B | 80 (9)   | 87 (10)  | 54 (15)  | 17 (10)  | 22 (8)   | 7 (8)    |
| C11B | 79 (10)  | 78 (9)   | 67 (14)  | 12 (8)   | 25 (8)   | 8 (7)    |
| C12B | 73 (8)   | 80 (8)   | 35 (9)   | 6 (6)    | 18 (7)   | 5 (6)    |
| C34B | 48 (6)   | 75 (5)   | 50 (5)   | -25 (4)  | 21 (4)   | -31 (4)  |
| C35B | 51 (6)   | 67 (5)   | 50 (6)   | -16 (4)  | 15 (5)   | -27 (4)  |

**Table S11 Anisotropic Displacement Parameters ( $\text{\AA}^2 \times 10^3$ ) for D2. The Anisotropic displacement factor exponent takes the form:  $-2\pi^2[h^2a^{*2}U_{11}+2hka^*b^*U_{12}+\dots]$ .**

| Atom | $U_{11}$ | $U_{22}$ | $U_{33}$ | $U_{23}$ | $U_{13}$ | $U_{12}$ |
|------|----------|----------|----------|----------|----------|----------|
| C36B | 76 (8)   | 70 (6)   | 91 (8)   | -9 (5)   | 34 (7)   | -33 (6)  |
| C37B | 132 (15) | 103 (8)  | 107 (10) | -17 (7)  | 70 (11)  | -58 (9)  |
| C38B | 180 (20) | 112 (8)  | 108 (11) | -29 (7)  | 103 (13) | -71 (9)  |
| C39B | 119 (13) | 99 (8)   | 75 (7)   | -31 (6)  | 66 (9)   | -53 (8)  |
| C52B | 30 (7)   | 77 (5)   | 55 (6)   | -47 (4)  | 0 (5)    | -14 (4)  |
| C53B | 39 (6)   | 81 (7)   | 64 (7)   | -50 (6)  | 1 (5)    | -7 (5)   |
| C54B | 48 (8)   | 100 (7)  | 81 (8)   | -53 (6)  | 23 (6)   | -14 (5)  |
| C55B | 27 (6)   | 99 (7)   | 52 (7)   | -47 (5)  | -4 (5)   | -18 (5)  |
| C56B | 30 (8)   | 99 (10)  | 59 (9)   | -44 (7)  | 4 (7)    | -20 (8)  |
| C57B | 62 (12)  | 101 (10) | 38 (7)   | -46 (7)  | 5 (7)    | -29 (8)  |
| C58B | 98 (13)  | 102 (10) | 41 (8)   | -39 (7)  | 27 (8)   | -25 (9)  |
| C59B | 76 (11)  | 99 (8)   | 28 (6)   | -43 (5)  | 6 (6)    | -27 (7)  |
| C60B | 30 (9)   | 96 (7)   | 38 (6)   | -40 (5)  | -1 (6)   | -16 (6)  |
| C61B | 137 (9)  | 138 (8)  | 128 (8)  | -76 (6)  | 58 (7)   | 4 (6)    |
| C62B | 137 (9)  | 138 (8)  | 128 (8)  | -76 (6)  | 58 (7)   | 4 (6)    |
| C63B | 137 (9)  | 138 (8)  | 128 (8)  | -76 (6)  | 58 (7)   | 4 (6)    |
| F1   | 350 (13) | 97 (5)   | 183 (8)  | -8 (5)   | -80 (8)  | 28 (6)   |
| F2   | 293 (12) | 130 (6)  | 124 (6)  | 22 (5)   | -42 (6)  | -57 (7)  |
| F3   | 222 (8)  | 89 (4)   | 123 (5)  | -20 (4)  | -42 (5)  | 39 (4)   |
| F4   | 288 (9)  | 120 (6)  | 98 (5)   | -14 (4)  | -33 (6)  | -25 (6)  |
| B1   | 260 (12) | 80 (7)   | 112 (8)  | 11 (6)   | -48 (8)  | -2 (7)   |

**Table S12 Bond Lengths for D2.**

| Atom | Atom | Length/ $\text{\AA}$ | Atom | Atom | Length/ $\text{\AA}$ |
|------|------|----------------------|------|------|----------------------|
| Cu1  | P1   | 2.2664 (17)          | C45  | C46  | 1.432 (9)            |
| Cu1  | P2   | 2.2839 (18)          | C46  | C47  | 1.377 (11)           |
| Cu1  | N1   | 2.085 (5)            | C46  | C49  | 1.505 (11)           |
| Cu1  | N2   | 2.087 (5)            | C47  | C48  | 1.404 (11)           |
| P1   | C1   | 1.831 (7)            | C48  | C52A | 1.483 (13)           |
| P1   | C7   | 1.826 (9)            | C48  | C52B | 1.484 (14)           |
| P1   | C13  | 1.837 (6)            | C50  | C51  | 1.508 (10)           |
| P2   | C23  | 1.840 (6)            | O4A  | C61A | 1.071 (18)           |
| P2   | C28  | 1.837 (7)            | O5A  | C61A | 1.36 (3)             |
| P2   | C34A | 2.06 (3)             | O5A  | C62A | 1.69 (2)             |
| P2   | C34B | 1.761 (11)           | C8A  | C9A  | 1.39 (2)             |
| O1   | C18  | 1.405 (7)            | C9A  | C10A | 1.41 (3)             |
| O1   | C24  | 1.374 (8)            | C10A | C11A | 1.43 (3)             |
| O2   | C49  | 1.192 (9)            | C11A | C12A | 1.41 (2)             |
| O3   | C49  | 1.329 (9)            | C34A | C35A | 1.38 (4)             |
| O3   | C50  | 1.461 (9)            | C34A | C39A | 1.42 (3)             |

**Table S12 Bond Lengths for D2.**

| Atom | Atom | Length/Å   | Atom | Atom | Length/Å   |
|------|------|------------|------|------|------------|
| N1   | C40  | 1.381 (7)  | C35A | C36A | 1.41 (4)   |
| N1   | C48  | 1.330 (8)  | C36A | C37A | 1.37 (4)   |
| N2   | C52A | 1.345 (13) | C37A | C38A | 1.38 (4)   |
| N2   | C60A | 1.374 (12) | C38A | C39A | 1.33 (4)   |
| N2   | C52B | 1.310 (15) | C52A | C53A | 1.429 (14) |
| N2   | C60B | 1.407 (13) | C53A | C54A | 1.349 (17) |
| C1   | C2   | 1.359 (12) | C54A | C55A | 1.410 (18) |
| C1   | C6   | 1.379 (10) | C54A | C61A | 1.548 (17) |
| C2   | C3   | 1.388 (12) | C55A | C56A | 1.392 (15) |
| C3   | C4   | 1.381 (14) | C55A | C60A | 1.414 (14) |
| C4   | C5   | 1.293 (16) | C56A | C57A | 1.342 (19) |
| C5   | C6   | 1.396 (15) | C57A | C58A | 1.415 (16) |
| C7   | C8A  | 1.549 (15) | C58A | C59A | 1.354 (13) |
| C7   | C12A | 1.235 (18) | C59A | C60A | 1.403 (17) |
| C7   | C8B  | 1.44 (2)   | C62A | C63A | 1.60 (3)   |
| C7   | C12B | 1.46 (2)   | O4B  | C61B | 1.09 (2)   |
| C13  | C14  | 1.408 (10) | O5B  | C61B | 1.68 (3)   |
| C13  | C18  | 1.397 (9)  | O5B  | C62B | 1.74 (2)   |
| C14  | C15  | 1.390 (9)  | C8B  | C9B  | 1.37 (3)   |
| C15  | C16  | 1.378 (11) | C9B  | C10B | 1.43 (4)   |
| C16  | C17  | 1.399 (9)  | C10B | C11B | 1.28 (4)   |
| C17  | C18  | 1.385 (8)  | C11B | C12B | 1.42 (4)   |
| C17  | C25  | 1.539 (10) | C34B | C35B | 1.385 (15) |
| C19  | C20  | 1.360 (11) | C34B | C39B | 1.414 (13) |
| C19  | C24  | 1.402 (8)  | C35B | C36B | 1.376 (16) |
| C19  | C25  | 1.527 (10) | C36B | C37B | 1.394 (18) |
| C20  | C21  | 1.402 (12) | C37B | C38B | 1.39 (2)   |
| C21  | C22  | 1.403 (9)  | C38B | C39B | 1.393 (19) |
| C22  | C23  | 1.397 (10) | C52B | C53B | 1.419 (15) |
| C23  | C24  | 1.397 (9)  | C53B | C54B | 1.381 (18) |
| C25  | C26  | 1.537 (11) | C54B | C55B | 1.41 (2)   |
| C25  | C27  | 1.531 (9)  | C54B | C61B | 1.530 (19) |
| C28  | C29  | 1.368 (11) | C55B | C56B | 1.403 (17) |
| C28  | C33  | 1.352 (12) | C55B | C60B | 1.423 (16) |
| C29  | C30  | 1.434 (15) | C56B | C57B | 1.35 (2)   |
| C30  | C31  | 1.278 (18) | C57B | C58B | 1.417 (19) |
| C31  | C32  | 1.377 (16) | C58B | C59B | 1.361 (16) |
| C32  | C33  | 1.402 (11) | C59B | C60B | 1.404 (19) |
| C40  | C41  | 1.417 (8)  | C62B | C63B | 1.64 (3)   |
| C40  | C45  | 1.413 (9)  | F1   | B1   | 1.31 (2)   |
| C41  | C42  | 1.364 (8)  | F2   | B1   | 1.33 (2)   |
| C42  | C43  | 1.398 (9)  | F3   | B1   | 1.52 (2)   |
| C43  | C44  | 1.372 (9)  | F4   | B1   | 1.52 (3)   |

**Table S12 Bond Lengths for D2.**

| Atom | Atom | Length/Å | Atom | Atom | Length/Å |
|------|------|----------|------|------|----------|
| C44  | C45  | 1.419(9) |      |      |          |

**Table S13 Bond Angles for D2.**

| Atom | Atom | Atom | Angle/°    | Atom | Atom | Atom | Angle/°   |
|------|------|------|------------|------|------|------|-----------|
| P1   | Cu1  | P2   | 116.74(8)  | C40  | C45  | C46  | 117.3(6)  |
| N1   | Cu1  | P1   | 114.45(14) | C44  | C45  | C46  | 124.0(6)  |
| N1   | Cu1  | P2   | 111.63(14) | C45  | C46  | C49  | 121.8(7)  |
| N1   | Cu1  | N2   | 79.7(2)    | C47  | C46  | C45  | 118.1(7)  |
| N2   | Cu1  | P1   | 119.49(15) | C47  | C46  | C49  | 120.0(6)  |
| N2   | Cu1  | P2   | 109.25(14) | C46  | C47  | C48  | 121.5(6)  |
| C1   | P1   | Cu1  | 113.7(3)   | N1   | C48  | C47  | 121.5(6)  |
| C1   | P1   | C13  | 102.3(3)   | N1   | C48  | C52A | 115.0(8)  |
| C7   | P1   | Cu1  | 116.2(3)   | N1   | C48  | C52B | 117.9(8)  |
| C7   | P1   | C1   | 106.7(4)   | C47  | C48  | C52A | 123.0(7)  |
| C7   | P1   | C13  | 102.0(4)   | C47  | C48  | C52B | 119.8(8)  |
| C13  | P1   | Cu1  | 114.4(2)   | O2   | C49  | O3   | 125.5(7)  |
| C23  | P2   | Cu1  | 111.7(2)   | O2   | C49  | C46  | 124.3(7)  |
| C23  | P2   | C34A | 106.6(7)   | O3   | C49  | C46  | 110.3(6)  |
| C28  | P2   | Cu1  | 116.5(2)   | O3   | C50  | C51  | 106.1(6)  |
| C28  | P2   | C23  | 105.0(3)   | C61A | O5A  | C62A | 118.3(16) |
| C28  | P2   | C34A | 114.5(7)   | C9A  | C8A  | C7   | 118.1(15) |
| C34A | P2   | Cu1  | 102.4(7)   | C8A  | C9A  | C10A | 118.6(14) |
| C34B | P2   | Cu1  | 121.0(5)   | C9A  | C10A | C11A | 120.7(16) |
| C34B | P2   | C23  | 102.6(4)   | C12A | C11A | C10A | 117(2)    |
| C34B | P2   | C28  | 97.9(5)    | C7   | C12A | C11A | 125.2(15) |
| C24  | O1   | C18  | 114.6(4)   | C35A | C34A | P2   | 126.1(19) |
| C49  | O3   | C50  | 115.7(6)   | C35A | C34A | C39A | 113(3)    |
| C40  | N1   | Cu1  | 128.9(4)   | C39A | C34A | P2   | 120.5(19) |
| C48  | N1   | Cu1  | 112.3(4)   | C34A | C35A | C36A | 125(3)    |
| C48  | N1   | C40  | 118.7(6)   | C37A | C36A | C35A | 118(3)    |
| C52A | N2   | Cu1  | 109.9(6)   | C36A | C37A | C38A | 120(3)    |
| C52A | N2   | C60A | 112.5(8)   | C39A | C38A | C37A | 121(3)    |
| C60A | N2   | Cu1  | 130.3(10)  | C38A | C39A | C34A | 124(3)    |
| C52B | N2   | Cu1  | 114.4(6)   | N2   | C52A | C48  | 113.5(9)  |
| C52B | N2   | C60B | 123.3(11)  | N2   | C52A | C53A | 127.5(11) |
| C60B | N2   | Cu1  | 122.2(10)  | C53A | C52A | C48  | 118.9(11) |
| C2   | C1   | P1   | 117.9(5)   | C54A | C53A | C52A | 116.7(13) |
| C2   | C1   | C6   | 116.1(8)   | C53A | C54A | C55A | 120.1(11) |
| C6   | C1   | P1   | 125.9(8)   | C53A | C54A | C61A | 115.6(14) |
| C1   | C2   | C3   | 122.4(8)   | C55A | C54A | C61A | 124.1(12) |
| C4   | C3   | C2   | 118.8(11)  | C54A | C55A | C60A | 117.4(10) |

**Table S13 Bond Angles for D2.**

| Atom Atom Atom | Angle/°    | Atom Atom Atom | Angle/°    |
|----------------|------------|----------------|------------|
| C5 C4 C3       | 120.1 (10) | C56A C55A C54A | 124.2 (12) |
| C4 C5 C6       | 121.3 (10) | C56A C55A C60A | 118.4 (13) |
| C1 C6 C5       | 121.2 (11) | C57A C56A C55A | 119.6 (13) |
| C8A C7 P1      | 113.0 (9)  | C56A C57A C58A | 121.6 (12) |
| C12A C7 P1     | 127.4 (8)  | C59A C58A C57A | 121.1 (14) |
| C12A C7 C8A    | 118.9 (11) | C58A C59A C60A | 117.2 (12) |
| C8B C7 P1      | 121.2 (9)  | N2 C60A C55A   | 125.1 (12) |
| C8B C7 C12B    | 110.3 (16) | N2 C60A C59A   | 112.7 (11) |
| C12B C7 P1     | 119.7 (10) | C59A C60A C55A | 121.9 (10) |
| C14 C13 P1     | 124.0 (5)  | O4A C61A O5A   | 113 (2)    |
| C18 C13 P1     | 118.7 (5)  | O4A C61A C54A  | 124.3 (17) |
| C18 C13 C14    | 117.2 (6)  | O5A C61A C54A  | 105.8 (16) |
| C15 C14 C13    | 119.2 (7)  | C63A C62A O5A  | 119.0 (19) |
| C16 C15 C14    | 121.7 (7)  | C61B O5B C62B  | 134.6 (16) |
| C15 C16 C17    | 120.9 (6)  | C9B C8B C7     | 124.6 (19) |
| C16 C17 C25    | 125.1 (5)  | C8B C9B C10B   | 115 (3)    |
| C18 C17 C16    | 116.5 (6)  | C11B C10B C9B  | 126 (3)    |
| C18 C17 C25    | 118.4 (6)  | C10B C11B C12B | 118 (3)    |
| C13 C18 O1     | 115.9 (5)  | C11B C12B C7   | 122 (2)    |
| C17 C18 O1     | 119.6 (6)  | C35B C34B P2   | 124.2 (7)  |
| C17 C18 C13    | 124.5 (6)  | C35B C34B C39B | 118.9 (10) |
| C20 C19 C24    | 116.8 (7)  | C39B C34B P2   | 116.6 (9)  |
| C20 C19 C25    | 125.6 (6)  | C36B C35B C34B | 122.8 (10) |
| C24 C19 C25    | 117.6 (7)  | C35B C36B C37B | 117.5 (13) |
| C19 C20 C21    | 122.3 (6)  | C38B C37B C36B | 121.8 (13) |
| C20 C21 C22    | 120.0 (8)  | C39B C38B C37B | 119.6 (12) |
| C23 C22 C21    | 119.1 (7)  | C38B C39B C34B | 119.3 (13) |
| C22 C23 P2     | 124.0 (5)  | N2 C52B C48    | 115.5 (10) |
| C22 C23 C24    | 118.3 (5)  | N2 C52B C53B   | 117.0 (11) |
| C24 C23 P2     | 117.5 (5)  | C53B C52B C48  | 124.9 (12) |
| O1 C24 C19     | 120.5 (6)  | C54B C53B C52B | 121.2 (14) |
| O1 C24 C23     | 116.1 (5)  | C53B C54B C55B | 122.0 (12) |
| C23 C24 C19    | 123.4 (7)  | C53B C54B C61B | 119.4 (17) |
| C19 C25 C17    | 106.8 (5)  | C55B C54B C61B | 118.3 (16) |
| C19 C25 C26    | 109.4 (6)  | C54B C55B C60B | 114.9 (12) |
| C19 C25 C27    | 112.0 (7)  | C56B C55B C54B | 123.4 (13) |
| C26 C25 C17    | 108.9 (7)  | C56B C55B C60B | 121.7 (15) |
| C27 C25 C17    | 111.3 (5)  | C57B C56B C55B | 117.8 (15) |
| C27 C25 C26    | 108.3 (6)  | C56B C57B C58B | 121.9 (15) |
| C29 C28 P2     | 124.1 (8)  | C59B C58B C57B | 119.7 (17) |
| C33 C28 P2     | 119.8 (5)  | C58B C59B C60B | 120.8 (15) |
| C33 C28 C29    | 115.9 (8)  | N2 C60B C55B   | 120.6 (14) |
| C28 C29 C30    | 120.9 (11) | C59B C60B N2   | 121.8 (14) |

**Table S13 Bond Angles for D2.**

| Atom | Atom | Atom | Angle/°    | Atom | Atom | Atom | Angle/°    |
|------|------|------|------------|------|------|------|------------|
| C31  | C30  | C29  | 121.7 (10) | C59B | C60B | C55B | 117.3 (12) |
| C30  | C31  | C32  | 119.4 (10) | O4B  | C61B | O5B  | 127.2 (19) |
| C31  | C32  | C33  | 119.4 (12) | O4B  | C61B | C54B | 131 (2)    |
| C28  | C33  | C32  | 122.7 (9)  | C54B | C61B | O5B  | 102.1 (16) |
| N1   | C40  | C41  | 117.5 (5)  | C63B | C62B | O5B  | 85.4 (18)  |
| N1   | C40  | C45  | 122.8 (5)  | F1   | B1   | F2   | 117.6 (16) |
| C45  | C40  | C41  | 119.6 (5)  | F1   | B1   | F3   | 108.6 (18) |
| C42  | C41  | C40  | 120.2 (6)  | F1   | B1   | F4   | 108 (2)    |
| C41  | C42  | C43  | 120.4 (5)  | F2   | B1   | F3   | 113.1 (19) |
| C44  | C43  | C42  | 120.9 (6)  | F2   | B1   | F4   | 104 (2)    |
| C43  | C44  | C45  | 120.2 (6)  | F3   | B1   | F4   | 104.4 (13) |
| C40  | C45  | C44  | 118.6 (5)  |      |      |      |            |

**Table S14 Torsion Angles for D2.**

| A      | B    | C    | D   | Angle/°     | A   | B   | C    | D    | Angle/°     |
|--------|------|------|-----|-------------|-----|-----|------|------|-------------|
| Cu1 P1 | C1   | C2   | C29 | -27.2 (6)   | C30 | C31 | C32  | C32  | 2.5 (18)    |
| Cu1 P1 | C1   | C6   | C30 | 148.5 (6)   | C31 | C32 | C33  | C33  | -1.9 (15)   |
| Cu1 P1 | C7   | C8A  | C31 | -82.0 (8)   | C32 | C33 | C28  | C28  | -0.4 (14)   |
| Cu1 P1 | C7   | C12A | C33 | 88.2 (13)   | C28 | C29 | C30  | C30  | -1.4 (15)   |
| Cu1 P1 | C7   | C8B  | C40 | 13.5 (12)   | N1  | C48 | C47  | C47  | -4.1 (11)   |
| Cu1 P1 | C7   | C12B | C40 | 157.8 (14)  | N1  | C48 | C52A | C52A | 167.5 (9)   |
| Cu1 P1 | C13  | C14  | C40 | 132.2 (6)   | N1  | C48 | C52B | C52B | -173.7 (10) |
| Cu1 P1 | C13  | C18  | C40 | -44.4 (6)   | C41 | C42 | C43  | C43  | 2.2 (9)     |
| Cu1 P2 | C23  | C22  | C40 | -125.0 (6)  | C45 | C46 | C47  | C47  | 0.0 (11)    |
| Cu1 P2 | C23  | C24  | C40 | 49.8 (6)    | C45 | C46 | C49  | C49  | 177.4 (7)   |
| Cu1 P2 | C28  | C29  | C41 | -160.2 (7)  | C40 | C45 | C44  | C44  | -0.8 (9)    |
| Cu1 P2 | C28  | C33  | C41 | 15.2 (7)    | C40 | C45 | C46  | C46  | 175.7 (6)   |
| Cu1 P2 | C34B | C35B | C41 | -106.3 (10) | C42 | C43 | C44  | C44  | -2.4 (10)   |
| Cu1 P2 | C34B | C39B | C42 | 66.4 (12)   | C43 | C44 | C45  | C45  | 1.0 (10)    |
| Cu1 N1 | C40  | C41  | C43 | 9.3 (8)     | C44 | C45 | C40  | C40  | 0.6 (9)     |
| Cu1 N1 | C40  | C45  | C43 | -174.0 (4)  | C44 | C45 | C46  | C46  | -175.6 (7)  |
| Cu1 N1 | C48  | C47  | C44 | 173.4 (7)   | C45 | C46 | C47  | C47  | 176.3 (8)   |
| Cu1 N1 | C48  | C52A | C44 | -15.0 (11)  | C45 | C46 | C49  | C49  | -6.3 (11)   |
| Cu1 N1 | C48  | C52B | C45 | 3.8 (11)    | C40 | C41 | C42  | C42  | -0.6 (9)    |
| Cu1 N2 | C52A | C48  | C45 | -33.0 (15)  | C46 | C47 | C48  | C48  | -1.0 (14)   |
| Cu1 N2 | C52A | C53A | C45 | 149.9 (16)  | C46 | C49 | O2   | O2   | -35.5 (13)  |
| Cu1 N2 | C60A | C55A | C45 | -146.0 (19) | C46 | C49 | O3   | O3   | 145.7 (7)   |
| Cu1 N2 | C60A | C59A | C46 | 41 (3)      | C47 | C48 | N1   | N1   | 3.2 (14)    |
| Cu1 N2 | C52B | C48  | C46 | 2.3 (17)    | C47 | C48 | C52A | C52A | -167.7 (12) |
| Cu1 N2 | C52B | C53B | C46 | 164.9 (12)  | C47 | C48 | C52B | C52B | 172.7 (11)  |
| Cu1 N2 | C60B | C55B | C47 | -166 (2)    | C46 | C49 | O2   | O2   | 141.9 (10)  |



**Table S14 Torsion Angles for D2.**

| <b>A</b> | <b>B</b> | <b>C</b> | <b>D</b> | <b>Angle/°</b> | <b>A</b> | <b>B</b> | <b>C</b> | <b>D</b> | <b>Angle/°</b> |
|----------|----------|----------|----------|----------------|----------|----------|----------|----------|----------------|
| Cu1      | N2       | C60B     | C59B     | 8 (4)          | C47      | C46      | C49      | O3       | -37.0 (12)     |
| P1       | C1       | C2       | C3       | -179.1 (6)     | C47      | C48      | C52A     | N2       | -155.3 (11)    |
| P1       | C1       | C6       | C5       | -179.9 (7)     | C47      | C48      | C52A     | C53A     | 22 (2)         |
| P1       | C7       | C8A      | C9A      | 174.0 (11)     | C47      | C48      | C52B     | N2       | -174.0 (11)    |
| P1       | C7       | C12A     | C11A     | -166.5 (17)    | C47      | C48      | C52B     | C53B     | 25 (2)         |
| P1       | C7       | C8B      | C9B      | 172 (2)        | C48      | N1       | C40      | C41      | -173.7 (6)     |
| P1       | C7       | C12B     | C11B     | -170 (2)       | C48      | N1       | C40      | C45      | 3.1 (9)        |
| P1       | C13      | C14      | C15      | -176.7 (7)     | C48      | C52A     | C53A     | C54A     | -176.7 (16)    |
| P1       | C13      | C18      | O1       | -3.4 (8)       | C48      | C52B     | C53B     | C54B     | 168.7 (16)     |
| P1       | C13      | C18      | C17      | 175.0 (5)      | C49      | O3       | C50      | C51      | 178.7 (8)      |
| P2       | C23      | C24      | O1       | 2.1 (8)        | C49      | C46      | C47      | C48      | -178.5 (8)     |
| P2       | C23      | C24      | C19      | -177.3 (5)     | C50      | O3       | C49      | O2       | -8.5 (13)      |
| P2       | C28      | C29      | C30      | 174.2 (8)      | C50      | O3       | C49      | C46      | 170.3 (7)      |
| P2       | C28      | C33      | C32      | -173.8 (7)     | C8A      | C7       | C12A     | C11A     | 3 (3)          |
| P2       | C34A     | C35A     | C36A     | -174 (2)       | C8A      | C9A      | C10A     | C11A     | -9 (3)         |
| P2       | C34A     | C39A     | C38A     | 177 (2)        | C9A      | C10A     | C11A     | C12A     | 14 (3)         |
| P2       | C34B     | C35B     | C36B     | 173.1 (11)     | C10A     | C11A     | C12A     | C7       | -12 (4)        |
| P2       | C34B     | C39B     | C38B     | -170.7 (16)    | C12A     | C7       | C8A      | C9A      | 2.9 (19)       |
| N1       | C40      | C41      | C42      | 176.3 (5)      | C34A     | P2       | C23      | C22      | 123.9 (10)     |
| N1       | C40      | C45      | C44      | -177.5 (6)     | C34A     | P2       | C23      | C24      | -61.2 (9)      |
| N1       | C40      | C45      | C46      | -1.0 (9)       | C34A     | P2       | C28      | C29      | -40.9 (11)     |
| N1       | C48      | C52A     | N2       | 33.2 (17)      | C34A     | P2       | C28      | C33      | 134.6 (9)      |
| N1       | C48      | C52A     | C53A     | -149.4 (14)    | C34A     | C35A     | C36A     | C37A     | -1 (5)         |
| N1       | C48      | C52B     | N2       | -4.2 (19)      | C35A     | C34A     | C39A     | C38A     | 4 (4)          |
| N1       | C48      | C52B     | C53B     | -165.2 (14)    | C35A     | C36A     | C37A     | C38A     | 3 (4)          |
| N2       | C52A     | C53A     | C54A     | 0 (3)          | C36A     | C37A     | C38A     | C39A     | -1 (4)         |
| N2       | C52B     | C53B     | C54B     | 8 (3)          | C37A     | C38A     | C39A     | C34A     | -3 (4)         |
| C1       | P1       | C7       | C8A      | 45.9 (8)       | C39A     | C34A     | C35A     | C36A     | -2 (4)         |
| C1       | P1       | C7       | C12A     | -143.9 (13)    | C52A     | N2       | C60A     | C55A     | 1 (4)          |
| C1       | P1       | C7       | C8B      | 141.5 (11)     | C52A     | N2       | C60A     | C59A     | -172.8 (19)    |
| C1       | P1       | C7       | C12B     | -74.2 (15)     | C52A     | C53A     | C54A     | C55A     | 6 (3)          |
| C1       | P1       | C13      | C14      | 8.8 (8)        | C52A     | C53A     | C54A     | C61A     | -178.3 (19)    |
| C1       | P1       | C13      | C18      | -167.8 (6)     | C53A     | C54A     | C55A     | C56A     | 172.8 (18)     |
| C1       | C2       | C3       | C4       | -2.3 (12)      | C53A     | C54A     | C55A     | C60A     | -9 (3)         |
| C2       | C1       | C6       | C5       | -4.1 (12)      | C53A     | C54A     | C61A     | O4A      | -174 (3)       |
| C2       | C3       | C4       | C5       | -1.2 (13)      | C53A     | C54A     | C61A     | O5A      | 53 (3)         |
| C3       | C4       | C5       | C6       | 1.8 (16)       | C54A     | C55A     | C56A     | C57A     | -179.2 (18)    |
| C4       | C5       | C6       | C1       | 1.0 (16)       | C54A     | C55A     | C60A     | N2       | 5 (4)          |
| C6       | C1       | C2       | C3       | 4.7 (11)       | C54A     | C55A     | C60A     | C59A     | 178 (2)        |
| C7       | P1       | C1       | C2       | -156.6 (6)     | C55A     | C54A     | C61A     | O4A      | 1 (4)          |
| C7       | P1       | C1       | C6       | 19.1 (7)       | C55A     | C54A     | C61A     | O5A      | -132 (2)       |
| C7       | P1       | C13      | C14      | -101.4 (7)     | C55A     | C56A     | C57A     | C58A     | -3 (3)         |
| C7       | P1       | C13      | C18      | 82.0 (6)       | C56A     | C55A     | C60A     | N2       | -176 (2)       |

**Table S14 Torsion Angles for D2.**

| A   | B   | C    | D    | Angle/°     | A    | B    | C    | D    | Angle/°     |
|-----|-----|------|------|-------------|------|------|------|------|-------------|
| C7  | C8A | C9A  | C10A | 0 (2)       | C56A | C55A | C60A | C59A | -3 (4)      |
| C7  | C8B | C9B  | C10B | -16 (5)     | C56A | C57A | C58A | C59A | 5 (3)       |
| C13 | P1  | C1   | C2   | 96.7 (6)    | C57A | C58A | C59A | C60A | -5 (3)      |
| C13 | P1  | C1   | C6   | -87.6 (7)   | C58A | C59A | C60A | N2   | 178.4 (19)  |
| C13 | P1  | C7   | C8A  | 152.8 (7)   | C58A | C59A | C60A | C55A | 5 (4)       |
| C13 | P1  | C7   | C12A | -37.0 (13)  | C60A | N2   | C52A | C48  | 173.5 (19)  |
| C13 | P1  | C7   | C8B  | -111.7 (12) | C60A | N2   | C52A | C53A | -4 (3)      |
| C13 | P1  | C7   | C12B | 32.7 (15)   | C60A | C55A | C56A | C57A | 2 (3)       |
| C13 | C14 | C15  | C16  | 0.9 (14)    | C61A | O5A  | C62A | C63A | -44 (4)     |
| C14 | C13 | C18  | O1   | 179.7 (6)   | C61A | C54A | C55A | C56A | -2 (3)      |
| C14 | C13 | C18  | C17  | -1.8 (11)   | C61A | C54A | C55A | C60A | 176 (2)     |
| C14 | C15 | C16  | C17  | 0.0 (13)    | C62A | O5A  | C61A | O4A  | 26 (4)      |
| C15 | C16 | C17  | C18  | -1.7 (11)   | C62A | O5A  | C61A | C54A | 165 (2)     |
| C15 | C16 | C17  | C25  | -179.9 (7)  | C8B  | C7   | C12B | C11B | -22 (3)     |
| C16 | C17 | C18  | O1   | -178.9 (6)  | C8B  | C9B  | C10B | C11B | 3 (6)       |
| C16 | C17 | C18  | C13  | 2.7 (10)    | C9B  | C10B | C11B | C12B | -1 (6)      |
| C16 | C17 | C25  | C19  | -145.9 (7)  | C10B | C11B | C12B | C7   | 12 (4)      |
| C16 | C17 | C25  | C26  | 96.1 (8)    | C12B | C7   | C8B  | C9B  | 25 (3)      |
| C16 | C17 | C25  | C27  | -23.3 (10)  | C34B | P2   | C23  | C22  | 104.0 (8)   |
| C18 | O1  | C24  | C19  | 35.1 (8)    | C34B | P2   | C23  | C24  | -81.2 (7)   |
| C18 | O1  | C24  | C23  | -144.3 (6)  | C34B | P2   | C28  | C29  | -29.7 (9)   |
| C18 | C13 | C14  | C15  | 0.0 (12)    | C34B | P2   | C28  | C33  | 145.8 (7)   |
| C18 | C17 | C25  | C19  | 36.0 (8)    | C34B | C35B | C36B | C37B | -2 (2)      |
| C18 | C17 | C25  | C26  | -82.0 (7)   | C35B | C34B | C39B | C38B | 2 (2)       |
| C18 | C17 | C25  | C27  | 158.6 (6)   | C35B | C36B | C37B | C38B | 0 (3)       |
| C19 | C20 | C21  | C22  | -2.3 (14)   | C36B | C37B | C38B | C39B | 3 (3)       |
| C20 | C19 | C24  | O1   | -177.5 (7)  | C37B | C38B | C39B | C34B | -4 (3)      |
| C20 | C19 | C24  | C23  | 1.9 (11)    | C39B | C34B | C35B | C36B | 1 (2)       |
| C20 | C19 | C25  | C17  | 144.1 (8)   | C52B | N2   | C60B | C55B | 11 (4)      |
| C20 | C19 | C25  | C26  | -98.1 (9)   | C52B | N2   | C60B | C59B | -175 (2)    |
| C20 | C19 | C25  | C27  | 22.0 (10)   | C52B | C53B | C54B | C55B | -3 (3)      |
| C20 | C21 | C22  | C23  | 2.0 (13)    | C52B | C53B | C54B | C61B | 170 (2)     |
| C21 | C22 | C23  | P2   | 175.0 (7)   | C53B | C54B | C55B | C56B | -176.7 (18) |
| C21 | C22 | C23  | C24  | 0.2 (11)    | C53B | C54B | C55B | C60B | 1 (3)       |
| C22 | C23 | C24  | O1   | 177.3 (6)   | C53B | C54B | C61B | O4B  | -144 (4)    |
| C22 | C23 | C24  | C19  | -2.2 (10)   | C53B | C54B | C61B | O5B  | 36 (3)      |
| C23 | P2  | C28  | C29  | 75.7 (8)    | C54B | C55B | C56B | C57B | -175 (2)    |
| C23 | P2  | C28  | C33  | -108.9 (6)  | C54B | C55B | C60B | N2   | -5 (4)      |
| C23 | P2  | C34B | C35B | 18.9 (12)   | C54B | C55B | C60B | C59B | -179 (2)    |
| C23 | P2  | C34B | C39B | -168.4 (11) | C55B | C54B | C61B | O4B  | 29 (5)      |
| C24 | O1  | C18  | C13  | 141.5 (6)   | C55B | C54B | C61B | O5B  | -151 (2)    |
| C24 | O1  | C18  | C17  | -37.0 (8)   | C55B | C56B | C57B | C58B | -6 (3)      |
| C24 | C19 | C20  | C21  | 0.4 (12)    | C56B | C55B | C60B | N2   | 173 (2)     |

**Table S14 Torsion Angles for D2.**

| A   | B   | C    | D    | Angle/°    | A    | B    | C    | D    | Angle/°  |
|-----|-----|------|------|------------|------|------|------|------|----------|
| C24 | C19 | C25  | C17  | -37.8 (8)  | C56B | C55B | C60B | C59B | -1 (4)   |
| C24 | C19 | C25  | C26  | 80.0 (8)   | C56B | C57B | C58B | C59B | -1 (4)   |
| C24 | C19 | C25  | C27  | -159.9 (6) | C57B | C58B | C59B | C60B | 7 (4)    |
| C25 | C17 | C18  | O1   | -0.6 (9)   | C58B | C59B | C60B | N2   | 180 (3)  |
| C25 | C17 | C18  | C13  | -179.0 (6) | C58B | C59B | C60B | C55B | -6 (4)   |
| C25 | C19 | C20  | C21  | 178.5 (8)  | C60B | N2   | C52B | C48  | -175 (2) |
| C25 | C19 | C24  | O1   | 4.2 (9)    | C60B | N2   | C52B | C53B | -12 (3)  |
| C25 | C19 | C24  | C23  | -176.4 (6) | C60B | C55B | C56B | C57B | 7 (3)    |
| C28 | P2  | C23  | C22  | 2.1 (7)    | C61B | O5B  | C62B | C63B | -135 (3) |
| C28 | P2  | C23  | C24  | 176.9 (5)  | C61B | C54B | C55B | C56B | 10 (3)   |
| C28 | P2  | C34B | C35B | 126.2 (11) | C61B | C54B | C55B | C60B | -172 (3) |
| C28 | P2  | C34B | C39B | -61.1 (11) | C62B | O5B  | C61B | O4B  | 11 (6)   |
| C28 | C29 | C30  | C31  | -0.9 (19)  | C62B | O5B  | C61B | C54B | -169 (3) |
| C29 | C28 | C33  | C32  | 2.0 (13)   |      |      |      |      |          |

**Table S15 Hydrogen Atom Coordinates ( $\text{\AA} \times 10^4$ ) and Isotropic Displacement Parameters ( $\text{\AA}^2 \times 10^3$ ) for D2.**

| Atom | x        | y       | z       | U(eq) |
|------|----------|---------|---------|-------|
| H2   | 3410.92  | 4772.22 | 3023.58 | 88    |
| H3   | 4623.22  | 5466.34 | 3533.66 | 104   |
| H4   | 6086.49  | 4430.49 | 4520.15 | 112   |
| H5   | 6277.8   | 2804.2  | 4982.41 | 130   |
| H6   | 5101.71  | 2089.94 | 4465.96 | 104   |
| H14  | 5935.84  | 2466.51 | 2811.97 | 89    |
| H15  | 7130.01  | 1916.13 | 1834.39 | 87    |
| H16  | 6228.85  | 1555.42 | 906.83  | 71    |
| H20  | 2066.17  | 2684.09 | -480.64 | 91    |
| H21  | 3.49     | 3814.08 | -540.09 | 104   |
| H22  | -978.61  | 4149.38 | 574.36  | 82    |
| H26A | 4572.18  | 89.07   | 1095.21 | 135   |
| H26B | 3238.72  | 432.23  | 662.46  | 135   |
| H26C | 3285.01  | 503.71  | 1510.47 | 135   |
| H27A | 4449.5   | 2415.51 | -240.66 | 102   |
| H27B | 3985.55  | 1562.92 | -388.85 | 102   |
| H27C | 5300.82  | 1251.77 | 55.38   | 102   |
| H29  | -2527.26 | 3507.8  | 1835.24 | 138   |
| H30  | -4596.4  | 4700.97 | 1650.04 | 137   |
| H31  | -4973.08 | 6274.92 | 1688.74 | 132   |
| H32  | -3281.23 | 6805.58 | 1822.27 | 120   |
| H33  | -1221.58 | 5650.22 | 1984.49 | 92    |
| H41  | 2649.7   | 4132.56 | 1309.4  | 52    |

**Table S15 Hydrogen Atom Coordinates ( $\text{\AA}\times 10^4$ ) and Isotropic Displacement Parameters ( $\text{\AA}^2\times 10^3$ ) for D2.**

| Atom | <i>x</i> | <i>y</i> | <i>z</i> | U(eq) |
|------|----------|----------|----------|-------|
| H42  | 3685.5   | 4362.19  | 180.64   | 57    |
| H43  | 3943.09  | 5917.73  | -408.91  | 63    |
| H44  | 3037.76  | 7285.69  | 77.04    | 63    |
| H47  | 494.1    | 7703.03  | 2184.54  | 100   |
| H50A | 900.88   | 10346.39 | 356.7    | 89    |
| H50B | 1231.89  | 10181.55 | 1230.12  | 89    |
| H51A | -1283.33 | 10690.5  | 661.47   | 120   |
| H51B | -749.04  | 11498.26 | 825.24   | 120   |
| H51C | -921.58  | 10601.95 | 1509.72  | 120   |
| H8A  | 2795.3   | 2408.99  | 4793.99  | 104   |
| H9A  | 2445.04  | 1038     | 5710.64  | 126   |
| H10A | 2659.18  | -439.4   | 5357.4   | 125   |
| H11A | 2623.62  | -347.2   | 4036.97  | 150   |
| H12A | 3311.65  | 901.39   | 3202.92  | 113   |
| H35A | 739.41   | 1239.21  | 2300.3   | 58    |
| H36A | 649.05   | -244.13  | 3176.19  | 80    |
| H37A | 18.13    | -182.49  | 4403.28  | 78    |
| H38A | -666.64  | 1358.83  | 4689.75  | 70    |
| H39A | -680.47  | 2781.52  | 3820.49  | 65    |
| H53A | -1372.88 | 7481.31  | 2597.63  | 97    |
| H56A | -3026.12 | 5924.08  | 4800.17  | 80    |
| H57A | -2274.22 | 4366.24  | 5645.13  | 73    |
| H58A | -500.93  | 3099.52  | 5384.18  | 68    |
| H59A | 727.31   | 3473.17  | 4355.68  | 59    |
| H62A | -5281.63 | 9307.61  | 2728.54  | 149   |
| H62B | -5589.48 | 8666.45  | 2243.9   | 149   |
| H63A | -6811.9  | 8092.96  | 3141.63  | 226   |
| H63B | -6772.01 | 8951.49  | 3508.27  | 226   |
| H63C | -5799.51 | 7826.85  | 3804.98  | 226   |
| H8B  | 1215.88  | 1990.48  | 3674.09  | 74    |
| H9B  | 1064.48  | 500.44   | 4491.69  | 116   |
| H10B | 2999.24  | -872.41  | 4808.59  | 110   |
| H11B | 4878.65  | -723.44  | 4541.15  | 110   |
| H12B | 4997.8   | 839.85   | 3774.57  | 91    |
| H35B | 523.46   | 1526.92  | 2050.83  | 66    |
| H36B | 129.09   | 95.89    | 2793.48  | 97    |
| H37B | -1017.93 | 202.33   | 3898.42  | 138   |
| H38B | -1727.23 | 1699.12  | 4258.22  | 157   |
| H39B | -1470.44 | 3171.63  | 3444.81  | 114   |
| H53B | -858.2   | 7433.53  | 3069.6   | 70    |
| H56B | -2649.14 | 5636.09  | 5085.45  | 70    |
| H57B | -2105.94 | 3940.95  | 5701.41  | 74    |

**Table S15 Hydrogen Atom Coordinates ( $\text{\AA}\times 10^4$ ) and Isotropic Displacement Parameters ( $\text{\AA}^2\times 10^3$ ) for D2.**

| Atom | <i>x</i> | <i>y</i> | <i>z</i> | U(eq) |
|------|----------|----------|----------|-------|
| H58B | -565.51  | 2720.93  | 5222.46  | 96    |
| H59B | 386.18   | 3217.75  | 4099.38  | 76    |
| H62C | -4036.66 | 9726.45  | 3863.71  | 170   |
| H62D | -3082.37 | 9999     | 3190.35  | 170   |
| H63D | -5127.29 | 10088.55 | 2578.78  | 213   |
| H63E | -3950.07 | 9206.72  | 2394.03  | 213   |
| H63F | -4882.97 | 8940.27  | 3052.3   | 213   |

**Table S16 Atomic Occupancy for D2.**

| Atom | Occupancy  | Atom | Occupancy  | Atom | Occupancy  |
|------|------------|------|------------|------|------------|
| O4A  | 0.551 (9)  | O5A  | 0.551 (9)  | C8A  | 0.655 (10) |
| H8A  | 0.655 (10) | C9A  | 0.655 (10) | H9A  | 0.655 (10) |
| C10A | 0.655 (10) | H10A | 0.655 (10) | C11A | 0.655 (10) |
| H11A | 0.655 (10) | C12A | 0.655 (10) | H12A | 0.655 (10) |
| C34A | 0.278 (18) | C35A | 0.278 (18) | H35A | 0.278 (18) |
| C36A | 0.278 (18) | H36A | 0.278 (18) | C37A | 0.278 (18) |
| H37A | 0.278 (18) | C38A | 0.278 (18) | H38A | 0.278 (18) |
| C39A | 0.278 (18) | H39A | 0.278 (18) | C52A | 0.551 (9)  |
| C53A | 0.551 (9)  | H53A | 0.551 (9)  | C54A | 0.551 (9)  |
| C55A | 0.551 (9)  | C56A | 0.551 (9)  | H56A | 0.551 (9)  |
| C57A | 0.551 (9)  | H57A | 0.551 (9)  | C58A | 0.551 (9)  |
| H58A | 0.551 (9)  | C59A | 0.551 (9)  | H59A | 0.551 (9)  |
| C60A | 0.551 (9)  | C61A | 0.551 (9)  | C62A | 0.551 (9)  |
| H62A | 0.551 (9)  | H62B | 0.551 (9)  | C63A | 0.551 (9)  |
| H63A | 0.551 (9)  | H63B | 0.551 (9)  | H63C | 0.551 (9)  |
| O4B  | 0.449 (9)  | O5B  | 0.449 (9)  | C8B  | 0.345 (10) |
| H8B  | 0.345 (10) | C9B  | 0.345 (10) | H9B  | 0.345 (10) |
| C10B | 0.345 (10) | H10B | 0.345 (10) | C11B | 0.345 (10) |
| H11B | 0.345 (10) | C12B | 0.345 (10) | H12B | 0.345 (10) |
| C34B | 0.722 (18) | C35B | 0.722 (18) | H35B | 0.722 (18) |
| C36B | 0.722 (18) | H36B | 0.722 (18) | C37B | 0.722 (18) |
| H37B | 0.722 (18) | C38B | 0.722 (18) | H38B | 0.722 (18) |
| C39B | 0.722 (18) | H39B | 0.722 (18) | C52B | 0.449 (9)  |
| C53B | 0.449 (9)  | H53B | 0.449 (9)  | C54B | 0.449 (9)  |
| C55B | 0.449 (9)  | C56B | 0.449 (9)  | H56B | 0.449 (9)  |
| C57B | 0.449 (9)  | H57B | 0.449 (9)  | C58B | 0.449 (9)  |
| H58B | 0.449 (9)  | C59B | 0.449 (9)  | H59B | 0.449 (9)  |
| C60B | 0.449 (9)  | C61B | 0.449 (9)  | C62B | 0.449 (9)  |
| H62C | 0.449 (9)  | H62D | 0.449 (9)  | C63B | 0.449 (9)  |
| H63D | 0.449 (9)  | H63E | 0.449 (9)  | H63F | 0.449 (9)  |

### Crystal structure determination of D2

**Crystal Data** for  $C_{63}H_{52}BCuF_4N_2O_5P_2$  ( $M=1129.35$  g/mol): triclinic, space group P-1 (no. 2),  $a = 11.2410(5)$  Å,  $b = 14.6532(8)$  Å,  $c = 18.4225(8)$  Å,  $\alpha = 73.672(3)^\circ$ ,  $\beta = 86.086(3)^\circ$ ,  $\gamma = 70.147(3)^\circ$ ,  $V = 2737.8(2)$  Å<sup>3</sup>,  $Z = 2$ ,  $T = 100.00$  K,  $\mu(\text{CuK}\alpha) = 1.668$  mm<sup>-1</sup>,  $D_{\text{calc}} = 1.370$  g/cm<sup>3</sup>, 57710 reflections measured ( $5^\circ \leq 2\theta \leq 141.634^\circ$ ), 10363 unique ( $R_{\text{int}} = 0.1112$ ,  $R_{\text{sigma}} = 0.0731$ ) which were used in all calculations. The final  $R_1$  was 0.0962 ( $I > 2\sigma(I)$ ) and  $wR_2$  was 0.3004 (all data).

### 6. Crystallography data for complex D3

**Table S17 Crystal data and structure refinement for D3.**

|                                               |                                                                    |
|-----------------------------------------------|--------------------------------------------------------------------|
| Identification code                           | <b>D3</b>                                                          |
| Empirical formula                             | $C_{60}H_{48}BCuF_4N_2O_5P_2$                                      |
| Formula weight                                | 1089.29                                                            |
| Temperature/K                                 | 100                                                                |
| Crystal system                                | monoclinic                                                         |
| Space group                                   | $P2_1/n$                                                           |
| $a/\text{\AA}$                                | 17.2437(18)                                                        |
| $b/\text{\AA}$                                | 10.7278(10)                                                        |
| $c/\text{\AA}$                                | 29.075(3)                                                          |
| $\alpha/^\circ$                               | 90                                                                 |
| $\beta/^\circ$                                | 103.722(5)                                                         |
| $\gamma/^\circ$                               | 90                                                                 |
| Volume/Å <sup>3</sup>                         | 5224.9(9)                                                          |
| $Z$                                           | 4                                                                  |
| $\rho_{\text{calc}}/\text{g/cm}^3$            | 1.385                                                              |
| $\mu/\text{mm}^{-1}$                          | 0.546                                                              |
| $F(000)$                                      | 2248.0                                                             |
| Crystal size/mm <sup>3</sup>                  | $0.43 \times 0.14 \times 0.08$                                     |
| Radiation                                     | MoK $\alpha$ ( $\lambda = 0.71073$ )                               |
| $2\theta$ range for data collection/ $^\circ$ | 4.906 to 55.308                                                    |
| Index ranges                                  | $-22 \leq h \leq 22$ , $-13 \leq k \leq 13$ , $-37 \leq l \leq 37$ |
| Reflections collected                         | 45782                                                              |
| Independent reflections                       | 11928 [ $R_{\text{int}} = 0.1572$ , $R_{\text{sigma}} = 0.2010$ ]  |
| Data/restraints/parameters                    | 11928/762/802                                                      |
| Goodness-of-fit on $F^2$                      | 1.023                                                              |
| Final R indexes [ $I \geq 2\sigma(I)$ ]       | $R_1 = 0.0931$ , $wR_2 = 0.2018$                                   |
| Final R indexes [all data]                    | $R_1 = 0.2138$ , $wR_2 = 0.2538$                                   |
| Largest diff. peak/hole / e Å <sup>-3</sup>   | 0.98/-0.83                                                         |

**Table S18 Fractional Atomic Coordinates ( $\times 10^4$ ) and Equivalent Isotropic Displacement Parameters ( $\text{\AA}^2 \times 10^3$ ) for D3.  $U_{\text{eq}}$  is defined as 1/3 of the trace of the orthogonalised  $U_{ij}$  tensor.**

| Atom | $x$        | $y$        | $z$        | $U(\text{eq})$ |
|------|------------|------------|------------|----------------|
| Cu1  | 4314.4 (5) | 5500.4 (7) | 6901.6 (3) | 28.5 (2)       |

**Table S18 Fractional Atomic Coordinates ( $\times 10^4$ ) and Equivalent Isotropic Displacement Parameters ( $\text{\AA}^2 \times 10^3$ ) for D3.  $U_{\text{eq}}$  is defined as 1/3 of the trace of the orthogonalised  $U_{ij}$  tensor.**

| Atom | <i>x</i>    | <i>y</i>    | <i>z</i>    | $U(\text{eq})$ |
|------|-------------|-------------|-------------|----------------|
| P1   | 3152.7 (10) | 5755.8 (15) | 6372.5 (5)  | 27.3 (4)       |
| P2   | 5429.4 (10) | 5129.2 (15) | 6604.1 (5)  | 25.5 (4)       |
| O2   | 6958 (3)    | 9481 (6)    | 8484 (2)    | 75.4 (19)      |
| O5   | 5115 (5)    | 3090 (6)    | 9183.8 (19) | 90 (2)         |
| O3   | 6223 (3)    | 8629 (5)    | 8936.2 (16) | 49.2 (13)      |
| O4   | 5541 (5)    | 1392 (7)    | 8862 (2)    | 93 (2)         |
| N1   | 4834 (3)    | 6807 (5)    | 7419.7 (17) | 28.7 (11)      |
| N2   | 4534 (3)    | 4406 (5)    | 7499.9 (17) | 31.7 (12)      |
| C59  | 5431 (10)   | 2542 (12)   | 9666 (3)    | 141 (6)        |
| C48  | 4955 (5)    | 3096 (7)    | 8361 (2)    | 47.5 (18)      |
| C57  | 6394 (6)    | 8903 (10)   | 9759 (3)    | 82 (3)         |
| C34  | 7339 (5)    | 4851 (7)    | 8022 (2)    | 48.4 (18)      |
| C53  | 3975 (4)    | 2558 (6)    | 7091 (2)    | 38.8 (16)      |
| C36  | 6373 (4)    | 3881 (6)    | 7379 (2)    | 36.1 (15)      |
| C46  | 4912 (4)    | 4984 (6)    | 7900 (2)    | 32.6 (14)      |
| C38  | 4788 (4)    | 8453 (6)    | 6858 (2)    | 38.1 (16)      |
| C50  | 4312 (5)    | 1177 (7)    | 7935 (3)    | 48.6 (18)      |
| C40  | 5629 (5)    | 10243 (7)   | 7078 (3)    | 52.2 (19)      |
| C55  | 6409 (4)    | 8838 (7)    | 8535 (3)    | 43.8 (17)      |
| C42  | 5612 (4)    | 8688 (6)    | 7671 (2)    | 37.4 (15)      |
| C44  | 5616 (4)    | 6989 (7)    | 8216 (2)    | 35.9 (15)      |
| C33  | 7215 (4)    | 5962 (7)    | 7781 (2)    | 41.6 (17)      |
| C7A  | 5188 (4)    | 7053 (6)    | 5935 (2)    | 33.4 (14)      |
| C35  | 6913 (4)    | 3795 (7)    | 7821 (2)    | 45.8 (18)      |
| C8A  | 5394 (5)    | 7978 (7)    | 5656 (2)    | 49.7 (18)      |
| C37  | 5075 (4)    | 7979 (6)    | 7322 (2)    | 31.9 (14)      |
| C9A  | 6192 (6)    | 8182 (7)    | 5685 (3)    | 58 (2)         |
| C39  | 5067 (5)    | 9563 (7)    | 6736 (3)    | 47.2 (18)      |
| C10A | 6780 (5)    | 7456 (7)    | 5977 (3)    | 55 (2)         |
| C41  | 5877 (5)    | 9853 (7)    | 7521 (3)    | 49.6 (18)      |
| C11A | 6547 (4)    | 6526 (6)    | 6246 (2)    | 39.6 (16)      |
| C43  | 5857 (4)    | 8157 (7)    | 8135 (2)    | 37.4 (15)      |
| C12A | 5745 (4)    | 6306 (6)    | 6237 (2)    | 30.5 (14)      |
| C45  | 5117 (4)    | 6310 (6)    | 7848 (2)    | 32.1 (14)      |
| C12B | 5501 (4)    | 3702 (6)    | 6275 (2)    | 32.8 (14)      |
| C47  | 5130 (5)    | 4351 (7)    | 8339 (2)    | 45.8 (18)      |
| C7B  | 4804 (5)    | 3106 (6)    | 6026 (2)    | 38.4 (15)      |
| C49  | 4562 (4)    | 2452 (7)    | 7949 (2)    | 39.5 (16)      |
| C8B  | 4850 (6)    | 2046 (7)    | 5753 (2)    | 53.0 (19)      |
| C52  | 3742 (5)    | 1337 (7)    | 7091 (3)    | 47.5 (19)      |
| C9B  | 5578 (6)    | 1575 (7)    | 5738 (3)    | 64 (2)         |

**Table S18 Fractional Atomic Coordinates ( $\times 10^4$ ) and Equivalent Isotropic Displacement Parameters ( $\text{\AA}^2 \times 10^3$ ) for D3.  $U_{\text{eq}}$  is defined as 1/3 of the trace of the orthogonalised  $U_{ij}$  tensor.**

| Atom | <i>x</i>  | <i>y</i>  | <i>z</i>    | $U(\text{eq})$ |
|------|-----------|-----------|-------------|----------------|
| C54  | 4363 (4)  | 3149 (6)  | 7519 (2)    | 33.5 (14)      |
| C10B | 6271 (6)  | 2144 (8)  | 5985 (3)    | 71 (2)         |
| C56  | 6735 (5)  | 9195 (8)  | 9354 (3)    | 62 (2)         |
| C11B | 6231 (5)  | 3188 (7)  | 6257 (2)    | 49.2 (19)      |
| C58  | 5234 (7)  | 2409 (10) | 8827 (3)    | 74 (3)         |
| C31  | 6253 (4)  | 4998 (6)  | 7130.5 (19) | 27.5 (13)      |
| C60  | 5351 (11) | 3383 (14) | 10010 (4)   | 168 (7)        |
| C32  | 6677 (4)  | 6054 (6)  | 7343 (2)    | 33.7 (15)      |
| C51  | 3917 (5)  | 649 (7)   | 7523 (3)    | 48.8 (18)      |
| O1B  | 3980 (9)  | 3925 (13) | 5960 (4)    | 32 (3)         |
| C16B | 1255 (17) | 2730 (30) | 6226 (9)    | 47 (6)         |
| C15B | 1460 (30) | 3330 (40) | 6590 (14)   | 39 (8)         |
| C14B | 2070 (20) | 4290 (40) | 6652 (13)   | 46 (10)        |
| C17B | 1580 (20) | 2880 (30) | 5860 (10)   | 74 (10)        |
| C19B | 2568 (10) | 7163 (14) | 6412 (6)    | 28 (5)         |
| C20B | 1932 (10) | 7581 (15) | 6057 (5)    | 44 (5)         |
| C21B | 1526 (8)  | 8661 (15) | 6124 (5)    | 54 (7)         |
| C22B | 1757 (9)  | 9322 (13) | 6546 (6)    | 40 (5)         |
| C23B | 2394 (10) | 8904 (17) | 6900 (5)    | 53 (8)         |
| C24B | 2800 (9)  | 7825 (18) | 6833 (5)    | 35 (6)         |
| C13B | 2410 (20) | 4590 (30) | 6298 (11)   | 38 (6)         |
| C18B | 2159 (17) | 3800 (30) | 5890 (9)    | 58 (8)         |
| C6B  | 3814 (9)  | 4883 (11) | 5649 (4)    | 27 (4)         |
| C5B  | 4064 (9)  | 4902 (12) | 5228 (5)    | 28 (5)         |
| C4B  | 3892 (9)  | 5925 (14) | 4927 (4)    | 41 (6)         |
| C3B  | 3469 (9)  | 6928 (11) | 5048 (4)    | 33 (5)         |
| C2B  | 3220 (8)  | 6909 (11) | 5468 (4)    | 26 (4)         |
| C1B  | 3392 (8)  | 5886 (13) | 5769 (4)    | 22 (4)         |
| F1   | 2624 (8)  | -837 (12) | 4728 (4)    | 228 (5)        |
| F4   | 2047 (6)  | 952 (9)   | 4595 (5)    | 203 (4)        |
| F2   | 1236 (6)  | -674 (7)  | 4459 (4)    | 177 (4)        |
| F3   | 2078 (6)  | -473 (11) | 4055 (3)    | 201 (4)        |
| B1   | 1996 (13) | -209 (18) | 4484 (7)    | 118 (4)        |
| O1A  | 4323 (3)  | 6863 (5)  | 5920.0 (18) | 26.3 (13)      |
| C16A | 917 (8)   | 3340 (11) | 6361 (4)    | 50 (3)         |
| C15A | 1615 (10) | 3180 (19) | 6731 (5)    | 47 (3)         |
| C13A | 2249 (8)  | 4838 (12) | 6397 (4)    | 30 (3)         |
| C17A | 886 (6)   | 4258 (10) | 6036 (4)    | 43 (2)         |
| C19A | 2740 (4)  | 7329 (5)  | 6320 (2)    | 27 (2)         |
| C20A | 2594 (4)  | 8012 (6)  | 5901.6 (19) | 39 (2)         |
| C21A | 2231 (4)  | 9174 (5)  | 5879 (2)    | 47 (3)         |



**Table S18 Fractional Atomic Coordinates ( $\times 10^4$ ) and Equivalent Isotropic Displacement Parameters ( $\text{\AA}^2 \times 10^3$ ) for D3.  $U_{\text{eq}}$  is defined as 1/3 of the trace of the orthogonalised  $U_{ij}$  tensor.**

| Atom | $x$      | $y$       | $z$         | $U(\text{eq})$ |
|------|----------|-----------|-------------|----------------|
| C22A | 2013 (4) | 9653 (5)  | 6275 (3)    | 48 (3)         |
| C23A | 2159 (5) | 8970 (7)  | 6693 (2)    | 48 (3)         |
| C24A | 2523 (5) | 7808 (6)  | 6715 (2)    | 40 (3)         |
| C1A  | 3321 (3) | 5298 (5)  | 5790.6 (15) | 24.9 (19)      |
| C6A  | 3918 (3) | 5920 (4)  | 5634.8 (17) | 23.4 (17)      |
| C5A  | 4116 (3) | 5550 (5)  | 5218.7 (18) | 29 (2)         |
| C4A  | 3716 (3) | 4558 (5)  | 4958.5 (15) | 32 (2)         |
| C3A  | 3119 (3) | 3936 (4)  | 5114.4 (17) | 34 (2)         |
| C2A  | 2921 (3) | 4306 (5)  | 5530.4 (18) | 28.5 (19)      |
| C18A | 1532 (5) | 5034 (9)  | 6051 (3)    | 37 (2)         |
| C14A | 2279 (9) | 3930 (13) | 6748 (5)    | 37 (3)         |

**Table S19 Anisotropic Displacement Parameters ( $\text{\AA}^2 \times 10^3$ ) for D3. The Anisotropic displacement factor exponent takes the form:  $-2\pi^2[h^2a^*U_{11}+2hka^*b^*U_{12}+\dots]$ .**

| Atom | $U_{11}$ | $U_{22}$  | $U_{33}$ | $U_{23}$  | $U_{13}$ | $U_{12}$ |
|------|----------|-----------|----------|-----------|----------|----------|
| Cu1  | 28.9 (4) | 31.3 (5)  | 23.6 (4) | -4.0 (3)  | 2.7 (3)  | 0.5 (4)  |
| P1   | 25.6 (9) | 32.7 (10) | 22.9 (8) | -2.9 (6)  | 4.1 (6)  | -1.1 (7) |
| P2   | 27.9 (9) | 25.6 (10) | 21.7 (8) | -1.1 (6)  | 3.5 (6)  | 2.2 (7)  |
| O2   | 53 (4)   | 105 (5)   | 67 (4)   | -31 (3)   | 12 (3)   | -35 (3)  |
| O5   | 165 (7)  | 68 (4)    | 33 (3)   | 9 (3)     | 19 (3)   | -19 (4)  |
| O3   | 41 (3)   | 65 (4)    | 34 (2)   | -14 (2)   | -7 (2)   | -9 (2)   |
| O4   | 135 (6)  | 66 (4)    | 62 (4)   | 22 (3)    | -9 (4)   | 8 (4)    |
| N1   | 30 (3)   | 29 (3)    | 27 (2)   | -7.6 (19) | 8 (2)    | 0 (2)    |
| N2   | 34 (3)   | 35 (3)    | 26 (2)   | -2 (2)    | 7 (2)    | -4 (2)   |
| C59  | 262 (16) | 112 (9)   | 33 (4)   | 19 (4)    | 6 (6)    | -42 (9)  |
| C48  | 63 (5)   | 46 (4)    | 34 (3)   | 6 (3)     | 12 (3)   | -4 (3)   |
| C57  | 86 (7)   | 111 (8)   | 41 (4)   | -28 (4)   | -4 (4)   | -36 (6)  |
| C34  | 46 (4)   | 64 (4)    | 31 (3)   | 0 (3)     | 0 (3)    | 12 (3)   |
| C53  | 45 (4)   | 40 (4)    | 34 (3)   | -3 (3)    | 14 (3)   | -10 (3)  |
| C36  | 41 (4)   | 36 (4)    | 31 (3)   | 8 (3)     | 7 (3)    | 11 (3)   |
| C46  | 34 (4)   | 38 (3)    | 26 (3)   | -4 (2)    | 8 (2)    | -2 (3)   |
| C38  | 47 (4)   | 33 (4)    | 35 (3)   | -6 (2)    | 12 (3)   | 10 (3)   |
| C50  | 66 (5)   | 36 (4)    | 48 (4)   | 4 (3)     | 23 (3)   | 1 (3)    |
| C40  | 69 (5)   | 36 (4)    | 57 (4)   | -11 (3)   | 27 (3)   | -9 (3)   |
| C55  | 31 (4)   | 51 (4)    | 44 (3)   | -16 (3)   | -3 (3)   | 0 (3)    |
| C42  | 30 (4)   | 37 (3)    | 45 (3)   | -15 (2)   | 10 (3)   | -1 (3)   |
| C44  | 28 (3)   | 46 (4)    | 31 (3)   | -13 (3)   | 2 (3)    | 1 (3)    |
| C33  | 33 (4)   | 54 (4)    | 33 (3)   | -10 (3)   | -1 (3)   | 4 (3)    |
| C7A  | 45 (3)   | 26 (3)    | 27 (3)   | -1 (2)    | 5 (2)    | 5 (2)    |
| C35  | 49 (4)   | 53 (4)    | 32 (3)   | 10 (3)    | 2 (3)    | 12 (3)   |

**Table S19 Anisotropic Displacement Parameters ( $\text{\AA}^2 \times 10^3$ ) for D3. The Anisotropic displacement factor exponent takes the form:  $-2\pi^2[h^2a^{*2}U_{11}+2hka^*b^*U_{12}+\dots]$ .**

| Atom | $U_{11}$ | $U_{22}$ | $U_{33}$ | $U_{23}$ | $U_{13}$ | $U_{12}$ |
|------|----------|----------|----------|----------|----------|----------|
| C8A  | 79 (5)   | 33 (4)   | 35 (4)   | 3 (3)    | 8 (3)    | -4 (3)   |
| C37  | 32 (3)   | 32 (3)   | 33 (3)   | -8 (2)   | 9 (2)    | 0 (2)    |
| C9A  | 87 (5)   | 41 (5)   | 46 (4)   | 8 (3)    | 17 (4)   | -10 (4)  |
| C39  | 69 (5)   | 31 (4)   | 46 (4)   | -7 (3)   | 22 (3)   | -2 (3)   |
| C10A | 61 (5)   | 54 (5)   | 50 (4)   | 4 (3)    | 14 (3)   | -19 (3)  |
| C41  | 55 (5)   | 40 (4)   | 56 (4)   | -21 (3)  | 16 (3)   | -13 (3)  |
| C11A | 45 (4)   | 38 (4)   | 36 (4)   | 4 (3)    | 10 (3)   | -6 (3)   |
| C43  | 26 (3)   | 44 (4)   | 40 (3)   | -16 (2)  | 3 (3)    | 2 (3)    |
| C12A | 43 (3)   | 23 (3)   | 24 (3)   | -2 (2)   | 6 (2)    | -2 (2)   |
| C45  | 31 (3)   | 38 (3)   | 25 (3)   | -6 (2)   | 4 (2)    | -1 (2)   |
| C12B | 50 (4)   | 30 (3)   | 18 (3)   | 1 (2)    | 9 (2)    | 2 (3)    |
| C47  | 59 (5)   | 50 (4)   | 25 (3)   | 0 (3)    | 3 (3)    | -5 (3)   |
| C7B  | 57 (4)   | 34 (4)   | 23 (3)   | -2 (2)   | 6 (3)    | -3 (3)   |
| C49  | 49 (4)   | 41 (3)   | 35 (3)   | 3 (2)    | 21 (3)   | 2 (3)    |
| C8B  | 95 (5)   | 33 (4)   | 25 (3)   | -4 (3)   | 2 (3)    | -3 (3)   |
| C52  | 67 (5)   | 38 (4)   | 43 (4)   | -3 (3)   | 25 (3)   | -15 (3)  |
| C9B  | 116 (6)  | 31 (4)   | 40 (4)   | -6 (3)   | 8 (4)    | 22 (4)   |
| C54  | 34 (4)   | 37 (3)   | 34 (3)   | -1 (2)   | 17 (3)   | -2 (3)   |
| C10B | 100 (6)  | 56 (5)   | 55 (5)   | -13 (4)  | 13 (4)   | 32 (4)   |
| C56  | 52 (5)   | 80 (6)   | 40 (4)   | -24 (4)  | -15 (3)  | -13 (4)  |
| C11B | 63 (4)   | 48 (4)   | 37 (4)   | -5 (3)   | 13 (3)   | 20 (3)   |
| C58  | 113 (7)  | 65 (5)   | 37 (4)   | 15 (3)   | 5 (4)    | -9 (4)   |
| C31  | 28 (3)   | 34 (3)   | 18 (3)   | 2 (2)    | 2 (2)    | 4 (2)    |
| C60  | 290 (20) | 155 (12) | 61 (6)   | -11 (7)  | 46 (9)   | -92 (12) |
| C32  | 30 (3)   | 39 (4)   | 30 (3)   | -5 (2)   | 5 (3)    | 8 (3)    |
| C51  | 68 (5)   | 39 (4)   | 48 (4)   | 1 (3)    | 31 (3)   | -4 (3)   |
| O1B  | 54 (6)   | 25 (6)   | 13 (6)   | -3 (4)   | -1 (5)   | -1 (5)   |
| C16B | 54 (13)  | 45 (13)  | 45 (10)  | -3 (9)   | 17 (9)   | -11 (11) |
| C15B | 45 (15)  | 35 (13)  | 37 (11)  | 7 (9)    | 11 (10)  | 2 (12)   |
| C14B | 56 (17)  | 48 (17)  | 37 (10)  | -3 (9)   | 19 (10)  | -11 (15) |
| C17B | 91 (18)  | 87 (16)  | 51 (11)  | -21 (11) | 31 (11)  | -48 (16) |
| C19B | 18 (8)   | 34 (8)   | 37 (8)   | 2 (5)    | 15 (6)   | -15 (6)  |
| C20B | 34 (9)   | 51 (10)  | 44 (9)   | -3 (7)   | 6 (7)    | -6 (7)   |
| C21B | 42 (11)  | 55 (11)  | 60 (10)  | -7 (8)   | 1 (8)    | 3 (9)    |
| C22B | 20 (10)  | 44 (10)  | 56 (10)  | -1 (8)   | 7 (8)    | -9 (8)   |
| C23B | 38 (12)  | 59 (12)  | 55 (11)  | -20 (9)  | -5 (9)   | 11 (10)  |
| C24B | 17 (10)  | 45 (10)  | 44 (9)   | -4 (7)   | 9 (7)    | -4 (7)   |
| C13B | 41 (11)  | 44 (10)  | 30 (9)   | 1 (6)    | 9 (7)    | -8 (8)   |
| C18B | 72 (15)  | 68 (13)  | 38 (9)   | -9 (9)   | 21 (9)   | -28 (12) |
| C6B  | 32 (9)   | 31 (7)   | 18 (6)   | 0 (5)    | 3 (6)    | 3 (6)    |
| C5B  | 30 (11)  | 37 (10)  | 15 (6)   | 1 (6)    | 0 (7)    | 10 (8)   |
| C4B  | 50 (14)  | 47 (9)   | 28 (8)   | 11 (7)   | 10 (8)   | 17 (9)   |

**Table S19 Anisotropic Displacement Parameters ( $\text{\AA}^2 \times 10^3$ ) for D3. The Anisotropic displacement factor exponent takes the form:  $-2\pi^2[h^2a^{*2}U_{11}+2hka^*b^*U_{12}+\dots]$ .**

| Atom | $U_{11}$ | $U_{22}$ | $U_{33}$ | $U_{23}$ | $U_{13}$ | $U_{12}$ |
|------|----------|----------|----------|----------|----------|----------|
| C3B  | 31 (11)  | 35 (9)   | 33 (8)   | 10 (6)   | 6 (7)    | 5 (7)    |
| C2B  | 16 (9)   | 31 (8)   | 28 (7)   | 7 (5)    | -1 (6)   | 3 (6)    |
| C1B  | 18 (8)   | 25 (7)   | 21 (6)   | -1 (4)   | -2 (5)   | -1 (6)   |
| F1   | 248 (10) | 280 (11) | 155 (8)  | -18 (7)  | 45 (7)   | 117 (9)  |
| F4   | 171 (8)  | 128 (6)  | 358 (13) | -43 (7)  | 155 (8)  | -11 (5)  |
| F2   | 173 (7)  | 99 (6)   | 310 (11) | -32 (6)  | 159 (7)  | -2 (5)   |
| F3   | 161 (8)  | 316 (12) | 137 (6)  | -31 (7)  | 59 (6)   | 27 (8)   |
| B1   | 144 (9)  | 104 (8)  | 128 (8)  | 10 (7)   | 78 (7)   | 7 (6)    |
| O1A  | 33 (3)   | 21 (3)   | 22 (3)   | -2 (2)   | 3 (2)    | 3 (2)    |
| C16A | 52 (6)   | 57 (6)   | 49 (5)   | -15 (4)  | 26 (5)   | -11 (5)  |
| C15A | 48 (6)   | 59 (7)   | 42 (7)   | -10 (5)  | 28 (5)   | -9 (5)   |
| C13A | 34 (5)   | 28 (5)   | 31 (5)   | -8 (4)   | 12 (3)   | -4 (4)   |
| C17A | 35 (5)   | 54 (6)   | 42 (5)   | -14 (4)  | 13 (4)   | -16 (4)  |
| C19A | 14 (5)   | 31 (4)   | 34 (4)   | -7 (3)   | 1 (3)    | -3 (3)   |
| C20A | 41 (6)   | 36 (5)   | 37 (4)   | -10 (3)  | 2 (4)    | 2 (4)    |
| C21A | 49 (6)   | 33 (5)   | 53 (5)   | -7 (4)   | 3 (4)    | 7 (4)    |
| C22A | 40 (6)   | 39 (6)   | 62 (5)   | -16 (4)  | 5 (4)    | -2 (4)   |
| C23A | 37 (7)   | 42 (5)   | 65 (6)   | -18 (4)  | 10 (5)   | -3 (5)   |
| C24A | 35 (7)   | 45 (5)   | 42 (5)   | -13 (4)  | 10 (4)   | -3 (5)   |
| C1A  | 29 (4)   | 22 (4)   | 20 (4)   | 2 (3)    | -1 (3)   | 4 (3)    |
| C6A  | 28 (4)   | 20 (4)   | 18 (3)   | 2 (3)    | -3 (3)   | 9 (3)    |
| C5A  | 35 (5)   | 28 (5)   | 21 (4)   | -1 (3)   | 1 (3)    | 6 (4)    |
| C4A  | 37 (5)   | 34 (5)   | 22 (4)   | -7 (3)   | 2 (3)    | 7 (4)    |
| C3A  | 36 (5)   | 36 (5)   | 24 (4)   | -6 (3)   | -2 (3)   | 3 (4)    |
| C2A  | 30 (4)   | 29 (5)   | 24 (4)   | -3 (3)   | 2 (3)    | 2 (3)    |
| C18A | 31 (4)   | 50 (5)   | 33 (4)   | -4 (4)   | 11 (3)   | -8 (4)   |
| C14A | 39 (6)   | 43 (7)   | 32 (5)   | 1 (4)    | 17 (4)   | 0 (5)    |

**Table S20 Bond Lengths for D3.**

| Atom | Atom | Length/ $\text{\AA}$ | Atom | Atom | Length/ $\text{\AA}$ |
|------|------|----------------------|------|------|----------------------|
| Cu1  | P1   | 2.2344 (18)          | C10A | C11A | 1.384 (9)            |
| Cu1  | P2   | 2.3222 (18)          | C11A | C12A | 1.398 (9)            |
| Cu1  | N1   | 2.097 (5)            | C12B | C7B  | 1.401 (9)            |
| Cu1  | N2   | 2.058 (5)            | C12B | C11B | 1.387 (9)            |
| P1   | C19B | 1.834 (12)           | C7B  | C8B  | 1.400 (9)            |
| P1   | C13B | 1.77 (3)             | C7B  | O1B  | 1.642 (16)           |
| P1   | C1B  | 1.901 (9)            | C49  | C54  | 1.427 (9)            |
| P1   | C13A | 1.859 (13)           | C8B  | C9B  | 1.364 (12)           |
| P1   | C19A | 1.824 (5)            | C52  | C51  | 1.424 (10)           |
| P1   | C1A  | 1.849 (4)            | C9B  | C10B | 1.382 (13)           |

**Table S20 Bond Lengths for D3.**

| Atom | Atom | Length/Å   | Atom | Atom | Length/Å   |
|------|------|------------|------|------|------------|
| P2   | C12A | 1.818 (6)  | C10B | C11B | 1.382 (10) |
| P2   | C12B | 1.825 (6)  | C31  | C32  | 1.409 (9)  |
| P2   | C31  | 1.830 (6)  | O1B  | C6B  | 1.355 (16) |
| O2   | C55  | 1.208 (9)  | C16B | C15B | 1.22 (5)   |
| O5   | C59  | 1.499 (11) | C16B | C17B | 1.32 (3)   |
| O5   | C58  | 1.325 (11) | C15B | C14B | 1.45 (5)   |
| O3   | C55  | 1.301 (9)  | C14B | C13B | 1.34 (5)   |
| O3   | C56  | 1.455 (8)  | C17B | C18B | 1.39 (4)   |
| O4   | C58  | 1.206 (11) | C19B | C20B | 1.3900     |
| N1   | C37  | 1.374 (8)  | C19B | C24B | 1.3900     |
| N1   | C45  | 1.335 (8)  | C20B | C21B | 1.3900     |
| N2   | C46  | 1.343 (8)  | C21B | C22B | 1.3900     |
| N2   | C54  | 1.384 (8)  | C22B | C23B | 1.3900     |
| C59  | C60  | 1.378 (17) | C23B | C24B | 1.3900     |
| C48  | C47  | 1.385 (10) | C13B | C18B | 1.44 (4)   |
| C48  | C49  | 1.410 (10) | C6B  | C5B  | 1.3900     |
| C48  | C58  | 1.516 (11) | C6B  | C1B  | 1.3900     |
| C57  | C56  | 1.469 (12) | C5B  | C4B  | 1.3900     |
| C34  | C33  | 1.373 (10) | C4B  | C3B  | 1.3900     |
| C34  | C35  | 1.400 (11) | C3B  | C2B  | 1.3900     |
| C53  | C52  | 1.371 (9)  | C2B  | C1B  | 1.3900     |
| C53  | C54  | 1.414 (9)  | F1   | B1   | 1.33 (2)   |
| C36  | C35  | 1.399 (9)  | F4   | B1   | 1.285 (19) |
| C36  | C31  | 1.390 (9)  | F2   | B1   | 1.39 (2)   |
| C46  | C45  | 1.483 (9)  | F3   | B1   | 1.318 (18) |
| C46  | C47  | 1.416 (9)  | O1A  | C6A  | 1.387 (7)  |
| C38  | C37  | 1.417 (9)  | C16A | C15A | 1.42 (2)   |
| C38  | C39  | 1.363 (10) | C16A | C17A | 1.356 (15) |
| C50  | C49  | 1.431 (10) | C15A | C14A | 1.390 (19) |
| C50  | C51  | 1.353 (10) | C13A | C18A | 1.412 (16) |
| C40  | C39  | 1.415 (10) | C13A | C14A | 1.404 (18) |
| C40  | C41  | 1.326 (11) | C17A | C18A | 1.383 (13) |
| C55  | C43  | 1.506 (9)  | C19A | C20A | 1.3900     |
| C42  | C37  | 1.422 (9)  | C19A | C24A | 1.3900     |
| C42  | C41  | 1.434 (10) | C20A | C21A | 1.3900     |
| C42  | C43  | 1.432 (9)  | C21A | C22A | 1.3900     |
| C44  | C43  | 1.357 (10) | C22A | C23A | 1.3900     |
| C44  | C45  | 1.407 (8)  | C23A | C24A | 1.3900     |
| C33  | C32  | 1.390 (9)  | C1A  | C6A  | 1.3900     |
| C7A  | C8A  | 1.381 (9)  | C1A  | C2A  | 1.3900     |
| C7A  | C12A | 1.389 (9)  | C6A  | C5A  | 1.3900     |
| C7A  | O1A  | 1.497 (9)  | C5A  | C4A  | 1.3900     |
| C8A  | C9A  | 1.376 (11) | C4A  | C3A  | 1.3900     |

**Table S20 Bond Lengths for D3.**

| Atom | Atom | Length/Å  | Atom | Atom | Length/Å |
|------|------|-----------|------|------|----------|
| C9A  | C10A | 1.396(11) | C3A  | C2A  | 1.3900   |

**Table S21 Bond Angles for D3.**

| Atom | Atom | Atom | Angle/°    | Atom | Atom | Atom | Angle/°   |
|------|------|------|------------|------|------|------|-----------|
| P1   | Cu1  | P2   | 116.80(6)  | C8B  | C7B  | O1B  | 122.1(8)  |
| N1   | Cu1  | P1   | 124.95(15) | C48  | C49  | C50  | 125.0(6)  |
| N1   | Cu1  | P2   | 97.59(14)  | C48  | C49  | C54  | 117.1(6)  |
| N2   | Cu1  | P1   | 127.37(15) | C54  | C49  | C50  | 117.9(7)  |
| N2   | Cu1  | P2   | 102.40(15) | C9B  | C8B  | C7B  | 119.7(8)  |
| N2   | Cu1  | N1   | 79.2(2)    | C53  | C52  | C51  | 119.6(7)  |
| C19B | P1   | Cu1  | 118.3(6)   | C8B  | C9B  | C10B | 120.6(8)  |
| C19B | P1   | C1B  | 103.8(7)   | N2   | C54  | C53  | 117.5(6)  |
| C13B | P1   | Cu1  | 120.3(12)  | N2   | C54  | C49  | 122.4(6)  |
| C13B | P1   | C19B | 101.2(13)  | C53  | C54  | C49  | 120.0(6)  |
| C13B | P1   | C1B  | 104.5(11)  | C9B  | C10B | C11B | 120.0(9)  |
| C1B  | P1   | Cu1  | 106.8(4)   | O3   | C56  | C57  | 107.5(7)  |
| C13A | P1   | Cu1  | 122.1(4)   | C10B | C11B | C12B | 120.8(8)  |
| C19A | P1   | Cu1  | 116.1(2)   | O5   | C58  | C48  | 110.9(9)  |
| C19A | P1   | C13A | 100.3(5)   | O4   | C58  | O5   | 125.2(8)  |
| C19A | P1   | C1A  | 108.1(3)   | O4   | C58  | C48  | 123.8(9)  |
| C1A  | P1   | Cu1  | 106.71(19) | C36  | C31  | P2   | 119.5(5)  |
| C1A  | P1   | C13A | 102.1(4)   | C36  | C31  | C32  | 117.9(6)  |
| C12A | P2   | Cu1  | 119.3(2)   | C32  | C31  | P2   | 121.6(5)  |
| C12A | P2   | C12B | 102.0(3)   | C33  | C32  | C31  | 120.6(6)  |
| C12A | P2   | C31  | 105.3(3)   | C50  | C51  | C52  | 121.3(7)  |
| C12B | P2   | Cu1  | 120.3(2)   | C6B  | O1B  | C7B  | 121.6(12) |
| C12B | P2   | C31  | 103.8(3)   | C15B | C16B | C17B | 123(3)    |
| C31  | P2   | Cu1  | 104.4(2)   | C16B | C15B | C14B | 122(4)    |
| C58  | O5   | C59  | 115.4(9)   | C13B | C14B | C15B | 121(4)    |
| C55  | O3   | C56  | 116.5(6)   | C16B | C17B | C18B | 118(3)    |
| C37  | N1   | Cu1  | 124.2(4)   | C20B | C19B | P1   | 124.7(10) |
| C45  | N1   | Cu1  | 113.7(4)   | C20B | C19B | C24B | 120.0     |
| C45  | N1   | C37  | 119.7(5)   | C24B | C19B | P1   | 115.3(10) |
| C46  | N2   | Cu1  | 115.1(4)   | C19B | C20B | C21B | 120.0     |
| C46  | N2   | C54  | 118.6(5)   | C22B | C21B | C20B | 120.0     |
| C54  | N2   | Cu1  | 126.2(4)   | C21B | C22B | C23B | 120.0     |
| C60  | C59  | O5   | 110.3(12)  | C22B | C23B | C24B | 120.0     |
| C47  | C48  | C49  | 120.3(6)   | C23B | C24B | C19B | 120.0     |
| C47  | C48  | C58  | 119.2(7)   | C14B | C13B | P1   | 121(3)    |
| C49  | C48  | C58  | 120.5(7)   | C14B | C13B | C18B | 113(3)    |
| C33  | C34  | C35  | 119.1(7)   | C18B | C13B | P1   | 126(2)    |

**Table S21 Bond Angles for D3.**

| Atom Atom Atom | Angle/°   | Atom Atom Atom | Angle/°    |
|----------------|-----------|----------------|------------|
| C52 C53 C54    | 120.4 (7) | C17B C18B C13B | 123 (3)    |
| C31 C36 C35    | 121.3 (7) | O1B C6B C5B    | 122.6 (11) |
| N2 C46 C45     | 115.6 (5) | O1B C6B C1B    | 117.4 (11) |
| N2 C46 C47     | 122.1 (6) | C5B C6B C1B    | 120.0      |
| C47 C46 C45    | 122.3 (6) | C4B C5B C6B    | 120.0      |
| C39 C38 C37    | 119.8 (7) | C3B C4B C5B    | 120.0      |
| C51 C50 C49    | 120.7 (7) | C2B C3B C4B    | 120.0      |
| C41 C40 C39    | 122.0 (7) | C3B C2B C1B    | 120.0      |
| O2 C55 O3      | 125.1 (7) | C6B C1B P1     | 114.6 (7)  |
| O2 C55 C43     | 123.6 (7) | C2B C1B P1     | 125.3 (7)  |
| O3 C55 C43     | 111.3 (7) | C2B C1B C6B    | 120.0      |
| C37 C42 C41    | 116.7 (6) | F1 B1 F2       | 119.0 (16) |
| C37 C42 C43    | 117.1 (6) | F4 B1 F1       | 111.0 (19) |
| C43 C42 C41    | 126.1 (6) | F4 B1 F2       | 111.6 (16) |
| C43 C44 C45    | 120.2 (6) | F4 B1 F3       | 115.5 (15) |
| C34 C33 C32    | 121.2 (7) | F3 B1 F1       | 98.1 (15)  |
| C8A C7A C12A   | 123.4 (7) | F3 B1 F2       | 100.7 (16) |
| C8A C7A O1A    | 118.2 (6) | C6A O1A C7A    | 118.3 (5)  |
| C12A C7A O1A   | 118.4 (6) | C17A C16A C15A | 120.1 (13) |
| C36 C35 C34    | 119.9 (7) | C14A C15A C16A | 119.9 (15) |
| C9A C8A C7A    | 118.1 (7) | C18A C13A P1   | 119.6 (9)  |
| N1 C37 C38     | 118.0 (6) | C14A C13A P1   | 120.6 (10) |
| N1 C37 C42     | 121.3 (6) | C14A C13A C18A | 119.8 (12) |
| C38 C37 C42    | 120.6 (6) | C16A C17A C18A | 121.1 (11) |
| C8A C9A C10A   | 121.4 (7) | C20A C19A P1   | 123.2 (4)  |
| C38 C39 C40    | 119.5 (7) | C20A C19A C24A | 120.0      |
| C11A C10A C9A  | 118.6 (8) | C24A C19A P1   | 116.7 (4)  |
| C40 C41 C42    | 121.2 (7) | C19A C20A C21A | 120.0      |
| C10A C11A C12A | 122.0 (7) | C22A C21A C20A | 120.0      |
| C42 C43 C55    | 121.6 (7) | C21A C22A C23A | 120.0      |
| C44 C43 C55    | 118.6 (6) | C24A C23A C22A | 120.0      |
| C44 C43 C42    | 119.7 (6) | C23A C24A C19A | 120.0      |
| C7A C12A P2    | 120.8 (5) | C6A C1A P1     | 117.4 (3)  |
| C7A C12A C11A  | 116.5 (6) | C6A C1A C2A    | 120.0      |
| C11A C12A P2   | 122.6 (5) | C2A C1A P1     | 122.4 (3)  |
| N1 C45 C46     | 115.8 (5) | O1A C6A C1A    | 117.5 (4)  |
| N1 C45 C44     | 121.7 (6) | O1A C6A C5A    | 122.4 (4)  |
| C44 C45 C46    | 122.4 (6) | C1A C6A C5A    | 120.0      |
| C7B C12B P2    | 119.8 (5) | C6A C5A C4A    | 120.0      |
| C11B C12B P2   | 121.8 (5) | C3A C4A C5A    | 120.0      |
| C11B C12B C7B  | 118.4 (6) | C2A C3A C4A    | 120.0      |
| C48 C47 C46    | 119.5 (6) | C3A C2A C1A    | 120.0      |
| C12B C7B O1B   | 115.4 (7) | C17A C18A C13A | 119.7 (10) |

**Table S21 Bond Angles for D3.**

| Atom Atom Atom | Angle/°   | Atom Atom Atom | Angle/°    |
|----------------|-----------|----------------|------------|
| C8B C7B C12B   | 120.4 (7) | C15A C14A C13A | 119.2 (13) |

**Table S22 Torsion Angles for D3.**

| A   | B    | C    | D    | Angle/°     | A    | B    | C    | D    | Angle/°     |
|-----|------|------|------|-------------|------|------|------|------|-------------|
| Cu1 | P1   | C19B | C20B | 165.7 (9)   | C12B | C7B  | O1B  | C6B  | 74.5 (13)   |
| Cu1 | P1   | C19B | C24B | -14.5 (10)  | C47  | C48  | C49  | C50  | -176.4 (7)  |
| Cu1 | P1   | C13B | C14B | 63 (4)      | C47  | C48  | C49  | C54  | 0.2 (11)    |
| Cu1 | P1   | C13B | C18B | -110 (3)    | C47  | C48  | C58  | O5   | 42.9 (12)   |
| Cu1 | P1   | C13A | C18A | -179.6 (6)  | C47  | C48  | C58  | O4   | -135.3 (10) |
| Cu1 | P1   | C13A | C14A | -1.3 (12)   | C47  | C46  | C45  | N1   | -176.3 (6)  |
| Cu1 | P1   | C19A | C20A | 119.7 (4)   | C47  | C46  | C45  | C44  | 7.1 (10)    |
| Cu1 | P1   | C19A | C24A | -64.3 (4)   | C7B  | C12B | C11B | C10B | 2.7 (11)    |
| Cu1 | P1   | C1A  | C6A  | -57.1 (3)   | C7B  | C8B  | C9B  | C10B | -0.8 (12)   |
| Cu1 | P1   | C1A  | C2A  | 117.6 (3)   | C7B  | O1B  | C6B  | C5B  | 31.6 (17)   |
| Cu1 | P2   | C12A | C7A  | -33.6 (6)   | C7B  | O1B  | C6B  | C1B  | -146.9 (9)  |
| Cu1 | P2   | C12A | C11A | 145.2 (5)   | C49  | C48  | C47  | C46  | 0.1 (11)    |
| Cu1 | P2   | C12B | C7B  | 27.5 (6)    | C49  | C48  | C58  | O5   | -140.7 (8)  |
| Cu1 | P2   | C12B | C11B | -153.3 (5)  | C49  | C48  | C58  | O4   | 41.1 (14)   |
| Cu1 | P2   | C31  | C36  | 80.8 (5)    | C49  | C50  | C51  | C52  | 0.5 (12)    |
| Cu1 | P2   | C31  | C32  | -87.1 (5)   | C8B  | C7B  | O1B  | C6B  | -89.2 (14)  |
| Cu1 | N1   | C37  | C38  | 16.1 (8)    | C8B  | C9B  | C10B | C11B | 1.2 (13)    |
| Cu1 | N1   | C37  | C42  | -162.4 (5)  | C52  | C53  | C54  | N2   | -175.7 (6)  |
| Cu1 | N1   | C45  | C46  | -8.9 (7)    | C52  | C53  | C54  | C49  | 4.2 (10)    |
| Cu1 | N1   | C45  | C44  | 167.8 (5)   | C9B  | C10B | C11B | C12B | -2.1 (12)   |
| Cu1 | N2   | C46  | C45  | -0.6 (7)    | C54  | N2   | C46  | C45  | 176.5 (5)   |
| Cu1 | N2   | C46  | C47  | -177.8 (5)  | C54  | N2   | C46  | C47  | -0.8 (9)    |
| Cu1 | N2   | C54  | C53  | -2.4 (8)    | C54  | C53  | C52  | C51  | -2.2 (11)   |
| Cu1 | N2   | C54  | C49  | 177.8 (5)   | C56  | O3   | C55  | O2   | -1.6 (12)   |
| P1  | C19B | C20B | C21B | 179.7 (13)  | C56  | O3   | C55  | C43  | 177.5 (6)   |
| P1  | C19B | C24B | C23B | -179.7 (12) | C11B | C12B | C7B  | C8B  | -2.4 (9)    |
| P1  | C13B | C18B | C17B | 178 (3)     | C11B | C12B | C7B  | O1B  | -166.4 (7)  |
| P1  | C13A | C18A | C17A | 172.7 (7)   | C58  | O5   | C59  | C60  | 173.6 (12)  |
| P1  | C13A | C14A | C15A | -174.0 (11) | C58  | C48  | C47  | C46  | 176.5 (8)   |
| P1  | C19A | C20A | C21A | 175.8 (5)   | C58  | C48  | C49  | C50  | 7.3 (12)    |
| P1  | C19A | C24A | C23A | -176.1 (5)  | C58  | C48  | C49  | C54  | -176.2 (7)  |
| P1  | C1A  | C6A  | O1A  | -2.1 (5)    | C31  | P2   | C12A | C7A  | -150.3 (5)  |
| P1  | C1A  | C6A  | C5A  | 174.9 (4)   | C31  | P2   | C12A | C11A | 28.6 (6)    |
| P1  | C1A  | C2A  | C3A  | -174.6 (4)  | C31  | P2   | C12B | C7B  | 143.6 (5)   |
| P2  | C12B | C7B  | C8B  | 176.8 (5)   | C31  | P2   | C12B | C11B | -37.2 (6)   |
| P2  | C12B | C7B  | O1B  | 12.8 (9)    | C31  | C36  | C35  | C34  | 0.6 (10)    |
| P2  | C12B | C11B | C10B | -176.5 (6)  | C51  | C50  | C49  | C48  | 178.0 (8)   |

**Table S22 Torsion Angles for D3.**

| A    | B    | C    | D    | Angle/°    | A    | B    | C    | D    | Angle/°     |
|------|------|------|------|------------|------|------|------|------|-------------|
| P2   | C31  | C32  | C33  | 170.0 (5)  | C51  | C50  | C49  | C54  | 1.5 (11)    |
| O2   | C55  | C43  | C42  | -36.8 (11) | O1B  | C7B  | C8B  | C9B  | 164.4 (8)   |
| O2   | C55  | C43  | C44  | 140.5 (8)  | O1B  | C6B  | C5B  | C4B  | -178.4 (15) |
| O3   | C55  | C43  | C42  | 144.1 (6)  | O1B  | C6B  | C1B  | P1   | 2.2 (13)    |
| O3   | C55  | C43  | C44  | -38.7 (9)  | O1B  | C6B  | C1B  | C2B  | 178.5 (14)  |
| N2   | C46  | C45  | N1   | 6.4 (8)    | C16B | C15B | C14B | C13B | 4 (6)       |
| N2   | C46  | C45  | C44  | -170.2 (6) | C16B | C17B | C18B | C13B | -1 (5)      |
| N2   | C46  | C47  | C48  | 0.2 (11)   | C15B | C16B | C17B | C18B | -2 (6)      |
| C59  | O5   | C58  | O4   | 2.9 (16)   | C15B | C14B | C13B | P1   | 180 (3)     |
| C59  | O5   | C58  | C48  | -175.3 (9) | C15B | C14B | C13B | C18B | -6 (5)      |
| C48  | C49  | C54  | N2   | -0.8 (10)  | C14B | C13B | C18B | C17B | 5 (5)       |
| C48  | C49  | C54  | C53  | 179.4 (7)  | C17B | C16B | C15B | C14B | 1 (6)       |
| C34  | C33  | C32  | C31  | -1.1 (10)  | C19B | P1   | C13B | C14B | -70 (3)     |
| C53  | C52  | C51  | C50  | -0.2 (12)  | C19B | P1   | C13B | C18B | 117 (3)     |
| C36  | C31  | C32  | C33  | 2.0 (9)    | C19B | C20B | C21B | C22B | 0.0         |
| C46  | N2   | C54  | C53  | -179.1 (6) | C20B | C19B | C24B | C23B | 0.0         |
| C46  | N2   | C54  | C49  | 1.0 (9)    | C20B | C21B | C22B | C23B | 0.0         |
| C50  | C49  | C54  | N2   | 176.0 (6)  | C21B | C22B | C23B | C24B | 0.0         |
| C50  | C49  | C54  | C53  | -3.8 (10)  | C22B | C23B | C24B | C19B | 0.0         |
| C55  | O3   | C56  | C57  | 176.8 (7)  | C24B | C19B | C20B | C21B | 0.0         |
| C33  | C34  | C35  | C36  | 0.3 (11)   | C13B | P1   | C19B | C20B | -60.5 (15)  |
| C7A  | C8A  | C9A  | C10A | 1.8 (12)   | C13B | P1   | C19B | C24B | 119.2 (13)  |
| C7A  | O1A  | C6A  | C1A  | 146.0 (5)  | C6B  | C5B  | C4B  | C3B  | 0.0         |
| C7A  | O1A  | C6A  | C5A  | -31.0 (7)  | C5B  | C6B  | C1B  | P1   | -176.3 (10) |
| C35  | C34  | C33  | C32  | -0.1 (11)  | C5B  | C6B  | C1B  | C2B  | 0.0         |
| C35  | C36  | C31  | P2   | -170.1 (5) | C5B  | C4B  | C3B  | C2B  | 0.0         |
| C35  | C36  | C31  | C32  | -1.7 (9)   | C4B  | C3B  | C2B  | C1B  | 0.0         |
| C8A  | C7A  | C12A | P2   | 178.6 (5)  | C3B  | C2B  | C1B  | P1   | 175.9 (12)  |
| C8A  | C7A  | C12A | C11A | -0.3 (10)  | C3B  | C2B  | C1B  | C6B  | 0.0         |
| C8A  | C7A  | O1A  | C6A  | 98.2 (7)   | C1B  | P1   | C19B | C20B | 47.6 (12)   |
| C8A  | C9A  | C10A | C11A | -0.8 (12)  | C1B  | P1   | C19B | C24B | -132.7 (9)  |
| C37  | N1   | C45  | C46  | -172.0 (5) | C1B  | P1   | C13B | C14B | -177 (3)    |
| C37  | N1   | C45  | C44  | 4.6 (9)    | C1B  | P1   | C13B | C18B | 10 (3)      |
| C37  | C38  | C39  | C40  | -1.3 (10)  | C1B  | C6B  | C5B  | C4B  | 0.0         |
| C37  | C42  | C41  | C40  | 0.0 (11)   | O1A  | C7A  | C8A  | C9A  | 177.5 (6)   |
| C37  | C42  | C43  | C55  | -178.6 (6) | O1A  | C7A  | C12A | P2   | -0.2 (8)    |
| C37  | C42  | C43  | C44  | 4.2 (9)    | O1A  | C7A  | C12A | C11A | -179.0 (5)  |
| C9A  | C10A | C11A | C12A | -0.8 (11)  | O1A  | C6A  | C5A  | C4A  | 176.9 (6)   |
| C39  | C38  | C37  | N1   | -174.3 (6) | C16A | C15A | C14A | C13A | 0 (2)       |
| C39  | C38  | C37  | C42  | 4.1 (10)   | C16A | C17A | C18A | C13A | 2.7 (15)    |
| C39  | C40  | C41  | C42  | 2.8 (12)   | C15A | C16A | C17A | C18A | 1.5 (18)    |
| C10A | C11A | C12A | P2   | -177.6 (6) | C13A | P1   | C19A | C20A | -106.6 (5)  |
| C10A | C11A | C12A | C7A  | 1.3 (10)   | C13A | P1   | C19A | C24A | 69.4 (5)    |



**Table S22 Torsion Angles for D3.**

| A       | B   | C        | D    | Angle/°    | A        | B    | C    | D    | Angle/°     |
|---------|-----|----------|------|------------|----------|------|------|------|-------------|
| C41     | C40 | C39      | C38  | -2.2 (12)  | C13AP1   | C1A  | C6A  |      | 173.7 (5)   |
| C41     | C42 | C37      | N1   | 174.9 (6)  | C13AP1   | C1A  | C2A  |      | -11.6 (6)   |
| C41     | C42 | C37      | C38  | -3.5 (9)   | C17AC16A | C15A | C14A |      | -3 (2)      |
| C41     | C42 | C43      | C55  | 3.5 (11)   | C19AP1   | C13A | C18A |      | 50.5 (8)    |
| C41     | C42 | C43      | C44  | -173.8 (7) | C19AP1   | C13A | C14A |      | -131.3 (10) |
| C43     | C42 | C37      | N1   | -3.3 (9)   | C19AP1   | C1A  | C6A  |      | 68.4 (4)    |
| C43     | C42 | C37      | C38  | 178.3 (6)  | C19AP1   | C1A  | C2A  |      | -116.8 (4)  |
| C43     | C42 | C41      | C40  | 178.0 (7)  | C19AC20A | C21A | C22A |      | 0.0         |
| C43     | C44 | C45      | N1   | -3.6 (10)  | C20AC19A | C24A | C23A |      | 0.0         |
| C43     | C44 | C45      | C46  | 172.8 (6)  | C20AC21A | C22A | C23A |      | 0.0         |
| C12AP2  |     | C12B     | C7B  | -107.1 (5) | C21AC22A | C23A | C24A |      | 0.0         |
| C12AP2  |     | C12B     | C11B | 72.1 (6)   | C22AC23A | C24A | C19A |      | 0.0         |
| C12AP2  |     | C31      | C36  | -152.8 (5) | C24AC19A | C20A | C21A |      | 0.0         |
| C12AP2  |     | C31      | C32  | 39.4 (6)   | C1A      | P1   | C13A | C18A | -60.8 (9)   |
| C12AC7A | C8A | C9A      |      | -1.2 (11)  | C1A      | P1   | C13A | C14A | 117.5 (10)  |
| C12AC7A | O1A | C6A      |      | -82.9 (7)  | C1A      | P1   | C19A | C20A | -0.1 (5)    |
| C45     | N1  | C37      | C38  | 177.3 (6)  | C1A      | P1   | C19A | C24A | 175.9 (4)   |
| C45     | N1  | C37      | C42  | -1.1 (9)   | C1A      | C6A  | C5A  | C4A  | 0.0         |
| C45     | C46 | C47      | C48  | -176.9 (7) | C6A      | C1A  | C2A  | C3A  | 0.0         |
| C45     | C44 | C43      | C55  | -178.3 (6) | C6A      | C5A  | C4A  | C3A  | 0.0         |
| C45     | C44 | C43      | C42  | -1.0 (10)  | C5A      | C4A  | C3A  | C2A  | 0.0         |
| C12BP2  |     | C12AC7A  |      | 101.6 (5)  | C4A      | C3A  | C2A  | C1A  | 0.0         |
| C12BP2  |     | C12AC11A |      | -79.6 (6)  | C2A      | C1A  | C6A  | O1A  | -177.0 (5)  |
| C12BP2  |     | C31      | C36  | -46.0 (6)  | C2A      | C1A  | C6A  | C5A  | 0.0         |
| C12BP2  |     | C31      | C32  | 146.2 (5)  | C18AC13A | C14A | C15A |      | 4 (2)       |
| C12B    | C7B | C8B      | C9B  | 1.4 (10)   | C14AC13A | C18A | C17A |      | -5.6 (16)   |

**Table S23 Hydrogen Atom Coordinates ( $\text{\AA} \times 10^4$ ) and Isotropic Displacement Parameters ( $\text{\AA}^2 \times 10^3$ ) for D3.**

| Atom | x       | y        | z        | U(eq) |
|------|---------|----------|----------|-------|
| H59A | 5133.49 | 1770.48  | 9698.67  | 169   |
| H59B | 6000.76 | 2322.64  | 9707.35  | 169   |
| H57A | 5873.41 | 9311.76  | 9717.06  | 124   |
| H57B | 6753.31 | 9203.73  | 10051.48 | 124   |
| H57C | 6327.21 | 7999.05  | 9779.13  | 124   |
| H34  | 7708.38 | 4799.44  | 8321.02  | 58    |
| H53  | 3875.98 | 3010.34  | 6802.25  | 47    |
| H36  | 6082.33 | 3161.71  | 7247.09  | 43    |
| H38  | 4401.81 | 7998.38  | 6632.74  | 46    |
| H50  | 4425.4  | 696.33   | 8217.08  | 58    |
| H40  | 5835.4  | 11001.15 | 6986.67  | 63    |

**Table S23 Hydrogen Atom Coordinates ( $\text{\AA}\times 10^4$ ) and Isotropic Displacement Parameters ( $\text{\AA}^2\times 10^3$ ) for D3.**

| Atom | <i>x</i> | <i>y</i> | <i>z</i> | U(eq) |
|------|----------|----------|----------|-------|
| H44  | 5783.8   | 6630.05  | 8522.13  | 43    |
| H33  | 7502.31  | 6680.77  | 7916.22  | 50    |
| H7A  | 4638.5   | 6920.3   | 5921.2   | 40    |
| H35  | 6990.26  | 3020.81  | 7984.68  | 55    |
| H8A  | 4995.41  | 8459.17  | 5449.71  | 60    |
| H9A  | 6345.14  | 8830.1   | 5502.1   | 69    |
| H39  | 4885.62  | 9878.23  | 6423.27  | 57    |
| H10A | 7329.29  | 7598.05  | 5991.15  | 66    |
| H41  | 6237.13  | 10355.5  | 7743.36  | 60    |
| H11A | 6944.62  | 6022.68  | 6442.3   | 48    |
| H47  | 5395.61  | 4784.49  | 8617.09  | 55    |
| H7B  | 4297.12  | 3424.25  | 6042.99  | 46    |
| H8B  | 4375.64  | 1655.77  | 5579.46  | 64    |
| H52  | 3466.04  | 950.48   | 6805.35  | 57    |
| H9B  | 5608.93  | 848.56   | 5556.55  | 77    |
| H10B | 6775.61  | 1818.38  | 5967.61  | 85    |
| H56A | 6758.69  | 10109.3  | 9312.57  | 74    |
| H56B | 7283.37  | 8856.71  | 9407.62  | 74    |
| H11B | 6709.55  | 3557.8   | 6434.65  | 59    |
| H60A | 5620.96  | 4162.97  | 9967.12  | 252   |
| H60B | 5592.37  | 3036.77  | 10323.68 | 252   |
| H60C | 4783.58  | 3546.94  | 9985.43  | 252   |
| H32  | 6594.35  | 6835.83  | 7185.53  | 40    |
| H51  | 3752.87  | -196.14  | 7521.4   | 59    |
| H16B | 845.78   | 2122.04  | 6204.13  | 57    |
| H15B | 1209.69  | 3172.65  | 6841.99  | 46    |
| H14B | 2235.6   | 4701.11  | 6947.89  | 55    |
| H17B | 1420.87  | 2371.02  | 5585.79  | 88    |
| H20B | 1773.78  | 7129.61  | 5768.93  | 53    |
| H21B | 1090.8   | 8946.17  | 5881.76  | 65    |
| H22B | 1479.78  | 10059.12 | 6591.37  | 48    |
| H23B | 2551.74  | 9355.53  | 7188.15  | 64    |
| H24B | 3234.72  | 7538.97  | 7075.33  | 42    |
| H18B | 2400.68  | 3901.59  | 5630.66  | 69    |
| H5B  | 4352.26  | 4215.86  | 5145.65  | 34    |
| H4B  | 4062.38  | 5937.81  | 4639.93  | 50    |
| H3B  | 3351.79  | 7627.43  | 4842.39  | 40    |
| H2B  | 2931.07  | 7595.12  | 5550.55  | 32    |
| H16A | 472.61   | 2802.55  | 6340.56  | 60    |
| H15A | 1628.05  | 2560.61  | 6966.43  | 56    |
| H17A | 412.26   | 4369.98  | 5794.51  | 52    |
| H20A | 2742.52  | 7684.08  | 5631.26  | 47    |

**Table S23 Hydrogen Atom Coordinates ( $\text{\AA}\times 10^4$ ) and Isotropic Displacement Parameters ( $\text{\AA}^2\times 10^3$ ) for D3.**

| Atom | <i>x</i> | <i>y</i> | <i>z</i> | U(eq) |
|------|----------|----------|----------|-------|
| H21A | 2130.71  | 9640.61  | 5593.46  | 56    |
| H22A | 1764.82  | 10447.52 | 6259.37  | 58    |
| H23A | 2010.73  | 9297.91  | 6963.1   | 58    |
| H24A | 2622.54  | 7341.37  | 7000.91  | 48    |
| H5A  | 4523.69  | 5974.9   | 5112.16  | 34    |
| H4A  | 3850.69  | 4305.33  | 4674.12  | 38    |
| H3A  | 2845.43  | 3258.48  | 4936.53  | 40    |
| H2A  | 2513.16  | 3881.19  | 5636.97  | 34    |
| H18A | 1493.8   | 5695.78  | 5829.86  | 44    |
| H14A | 2747     | 3829.09  | 6995.07  | 44    |

**Table S24 Atomic Occupancy for D3.**

| Atom | Occupancy | Atom | Occupancy | Atom | Occupancy |
|------|-----------|------|-----------|------|-----------|
| H7A  | 0.293(4)  | H7B  | 0.707(4)  | O1B  | 0.293(4)  |
| C16B | 0.293(4)  | H16B | 0.293(4)  | C15B | 0.293(4)  |
| H15B | 0.293(4)  | C14B | 0.293(4)  | H14B | 0.293(4)  |
| C17B | 0.293(4)  | H17B | 0.293(4)  | C19B | 0.293(4)  |
| C20B | 0.293(4)  | H20B | 0.293(4)  | C21B | 0.293(4)  |
| H21B | 0.293(4)  | C22B | 0.293(4)  | H22B | 0.293(4)  |
| C23B | 0.293(4)  | H23B | 0.293(4)  | C24B | 0.293(4)  |
| H24B | 0.293(4)  | C13B | 0.293(4)  | C18B | 0.293(4)  |
| H18B | 0.293(4)  | C6B  | 0.293(4)  | C5B  | 0.293(4)  |
| H5B  | 0.293(4)  | C4B  | 0.293(4)  | H4B  | 0.293(4)  |
| C3B  | 0.293(4)  | H3B  | 0.293(4)  | C2B  | 0.293(4)  |
| H2B  | 0.293(4)  | C1B  | 0.293(4)  | O1A  | 0.707(4)  |
| C16A | 0.707(4)  | H16A | 0.707(4)  | C15A | 0.707(4)  |
| H15A | 0.707(4)  | C13A | 0.707(4)  | C17A | 0.707(4)  |
| H17A | 0.707(4)  | C19A | 0.707(4)  | C20A | 0.707(4)  |
| H20A | 0.707(4)  | C21A | 0.707(4)  | H21A | 0.707(4)  |
| C22A | 0.707(4)  | H22A | 0.707(4)  | C23A | 0.707(4)  |
| H23A | 0.707(4)  | C24A | 0.707(4)  | H24A | 0.707(4)  |
| C1A  | 0.707(4)  | C6A  | 0.707(4)  | C5A  | 0.707(4)  |
| H5A  | 0.707(4)  | C4A  | 0.707(4)  | H4A  | 0.707(4)  |
| C3A  | 0.707(4)  | H3A  | 0.707(4)  | C2A  | 0.707(4)  |
| H2A  | 0.707(4)  | C18A | 0.707(4)  | H18A | 0.707(4)  |
| C14A | 0.707(4)  | H14A | 0.707(4)  |      |           |

### 6.1. Crystal structure determination of D3

**Crystal Data** for  $\text{C}_{60}\text{H}_{48}\text{BCuF}_4\text{N}_2\text{O}_5\text{P}_2$  ( $M=1089.29$  g/mol): monoclinic, space group  $\text{P}2_1/\text{n}$  (no. 14),  $a = 17.2437(18)$   $\text{\AA}$ ,  $b = 10.7278(10)$   $\text{\AA}$ ,  $c = 29.075(3)$   $\text{\AA}$ ,  $\beta = 103.722(5)^\circ$ ,  $V = 5224.9(9)$   $\text{\AA}^3$ ,  $Z = 4$ ,  $T = 100$  K,  $\mu(\text{MoK}\alpha) = 0.546$   $\text{mm}^{-1}$ ,  $D_{\text{calc}} = 1.385$   $\text{g/cm}^3$ , 45782 reflections measured ( $4.906^\circ \leq 2\theta \leq 55.308^\circ$ ), 11928 unique

( $R_{\text{int}} = 0.1572$ ,  $R_{\text{sigma}} = 0.2010$ ) which were used in all calculations. The final  $R_1$  was 0.0931 ( $I > 2\sigma(I)$ ) and  $wR_2$  was 0.2538 (all data).

Table S25. Calculated bond lengths and angles

| Complexes                                                                                                 | D2        | D3        | D1       |
|-----------------------------------------------------------------------------------------------------------|-----------|-----------|----------|
| Bond Lengths (Å)                                                                                          |           |           |          |
| Cu-N <sub>1</sub>                                                                                         | 1.99(1)   | 1.99(1)   | 2.04(7)  |
| Cu-N <sub>2</sub>                                                                                         | 1.95(3)   | 1.95(3)   | 2.11(8)  |
| Cu-P <sub>1</sub> /Cu-N <sub>3</sub>                                                                      | 2.46(3)   | 2.46(3)   | 2.04(2)  |
| Cu-P <sub>2</sub> /Cu-N <sub>4</sub>                                                                      | 2.48(5)   | 2.48(5)   | 2.09(8)  |
| Cu-O <sub>1</sub>                                                                                         | 3.08(1)   | 3.08(1)   | -        |
| Dihedral angle                                                                                            |           |           |          |
| N <sub>1</sub> -Cu-N <sub>2</sub> to P <sub>1</sub> -Cu-P <sub>2</sub> /N <sub>3</sub> -Cu-N <sub>4</sub> | 86.7(4)   | 93.3(5)   | 74.7(9)  |
| Bond angles (°)                                                                                           |           |           |          |
| N <sub>1</sub> -Cu-N <sub>2</sub>                                                                         | 88.6(3)   | 88.63(3)  | 80.1(3)  |
| P <sub>1</sub> -Cu-P <sub>2</sub> /N <sub>3</sub> -Cu-N <sub>4</sub>                                      | 123.29(5) | 123.29(5) | 80.6(5)  |
| P <sub>1</sub> -Cu-N <sub>1</sub> /N <sub>1</sub> -Cu-N <sub>3</sub>                                      | 114.98(5) | 114.98(5) | 118.2(2) |
| P <sub>1</sub> -Cu-N <sub>2</sub> /N <sub>2</sub> -Cu-N <sub>3</sub>                                      | 103.90(5) | 103.90(5) | 127.2(6) |
| P <sub>2</sub> -Cu-N <sub>1</sub> /N <sub>1</sub> -Cu-N <sub>4</sub>                                      | 111.06(5) | 111.06(5) | 117.0(1) |
| P <sub>2</sub> -Cu-N <sub>2</sub> /N <sub>2</sub> -Cu-N <sub>4</sub>                                      | 108.54(1) | 108.54(1) | 127.2(6) |

#### References:

- (1) Hoertz, P. G.; Staniszewski, A.; Marton, A.; Higgins, G. T.; Incarvito, C. D.; Rheingold, A. L.; Meyer, G. J. Toward Exceeding the Shockley-Queisser Limit: Photoinduced Interfacial Charge Transfer Processes That Store Energy in Excess of the Equilibrated Excited State. *J Am Chem Soc* **2006**, *128* (25), 8234–8245.
- (2) Fresta, E.; Weber, M. D.; Fernandez-Cestau, J.; Costa, R. D. White Light-Emitting Electrochemical Cells Based on Deep-Red Cu(I) Complexes. *Adv Opt Mater* **2019**, *7* (23), 1900830. <https://doi.org/10.1002/ADOM.201900830>.
